# Supplementary material for: Ligature-Induced Experimental Peri-Implantitis—A Systematic Review
Source: MDPI journal article supplement (doi:10.3390/jcm7120492), 2018-11-28
Supplement: s1 [file s1]

Table S1. Main characteristics of the studies included in the qualitative synthesis.

| Author                    | Published | Species                      | Comparison<br>(X vsY)                                                  | No. of<br>animals | Jaw                     | No. of<br>extracted<br>teeth                                                                                            | Healing<br>period<br>(m=months,<br>w=weeks) | Study<br>design<br>(split<br>mouth, inter<br>quadrant)                                                                                                                  | Shape<br>(cylindrical/<br>screw-type)                                                | Size<br>(withd/<br>Length)<br>(mm) | Type of implant |         | Bone level/<br>Tissue level | Nr of<br>implants/<br>animal                                             | 1 stage/<br>2 stage<br>surgery | Surgical protocol                                  |                                                                                                         | Randomisation                                                                                          | Loading                                                                                                                                                   | Antibiotic                                                                                | Pre- and postoperative care                                                                                           |                                           |                                                                                                                                                                                                                                                |
|---------------------------|-----------|------------------------------|------------------------------------------------------------------------|-------------------|-------------------------|-------------------------------------------------------------------------------------------------------------------------|---------------------------------------------|-------------------------------------------------------------------------------------------------------------------------------------------------------------------------|--------------------------------------------------------------------------------------|------------------------------------|-----------------|---------|-----------------------------|--------------------------------------------------------------------------|--------------------------------|----------------------------------------------------|---------------------------------------------------------------------------------------------------------|--------------------------------------------------------------------------------------------------------|-----------------------------------------------------------------------------------------------------------------------------------------------------------|-------------------------------------------------------------------------------------------|-----------------------------------------------------------------------------------------------------------------------|-------------------------------------------|------------------------------------------------------------------------------------------------------------------------------------------------------------------------------------------------------------------------------------------------|
|                           |           |                              |                                                                        |                   |                         |                                                                                                                         |                                             |                                                                                                                                                                         |                                                                                      |                                    | Material        | Coating |                             |                                                                          |                                | Implant<br>center to<br>center<br>distance<br>(mm) | Time<br>implant<br>healing +<br>abutment-PI<br>induction                                                |                                                                                                        |                                                                                                                                                           |                                                                                           | Plaque<br>control timing<br>(before/ after<br>induction)                                                              | Plaque<br>control<br>duration<br>(months) | Plaque<br>control<br>method                                                                                                                                                                                                                    |
| 1.<br>Klinge              | 1991      | Dog,<br>Beagle               | Implants vs<br>teeth – Pilot<br>studys                                 | 2                 | Mandible                | All PMs<br>on the<br>right side                                                                                         | 75d                                         | Split mouth<br>– implants<br>vs teeth                                                                                                                                   | Screw-type<br>(Nobelpharma<br>Company)                                               | NA                                 | Ti              | NA (U?) | Bone level                  | 7: 3 in one<br>dog and 4 in<br>the other                                 | 2-stage                        | NA                                                 | 6m+4w                                                                                                   | No                                                                                                     | NA-no<br>suprastruct<br>ure                                                                                                                               | Na –<br>perioperative<br>drugs no<br>specified                                            | NA                                                                                                                    | NA                                        | NA                                                                                                                                                                                                                                             |
| 2.<br>Hickey<br>et al     | 1991      | Microsw<br>ine               | Microbiologic<br>changes                                               | 2                 | Mandible                | All<br>mandibula<br>r PMs                                                                                               | >4m                                         | Split mouth                                                                                                                                                             | Screw shaped                                                                         | NA<br>Bånemark                     | Ti              | U       | Bone level                  | 6: 3 in each<br>side of the<br>mandible                                  | 2-stage                        | NA                                                 | 2m+2w                                                                                                   | Yes – Ligatures on<br>randomised side in the<br>first swine. Other side<br>used in the second<br>swine | NA (no<br>suprastruct<br>ure)                                                                                                                             | NA                                                                                        | (A) Only control<br>side. 2w after<br>abutment<br>placement (day<br>0)                                                | (A) 45d                                   | (A) Scaled<br>and<br>cleaned<br>free of<br>plaque<br>and<br>calculus<br>every 5d<br>(1) Brush,<br>interdental<br>brush,<br>electric<br>pencil<br>brush,<br>CHX<br>0,2%.<br>Interval<br>NA.<br>(2) CHX<br>twice a<br>week<br>(3) same<br>as (1) |
| 3.<br>Akagaw<br>a et al.  | 1992      | Monkey,<br>Macaca<br>fuscata | Ligature vs no<br>ligature on<br>implants and<br>teeth                 | 9                 | Maxilla and<br>mandible | 6<br>(Maxillary<br>lateral<br>incisor,<br>mandibula<br>r second<br>premolar<br>and first<br>molar on<br>both<br>sides.) | 3m                                          | Split mouth<br>with<br>ligatures on<br>one side and<br>plaque<br>control on<br>the other.<br>Also inter-<br>quadrant<br>comparison<br>between<br>teeth and<br>implants. | Screw-type with<br>integrated<br>abutment for<br>cementum<br>retained<br>restoration | NA                                 | Sapphire        | NA      | Tissue level                | 4 (1 in each<br>quadrant)                                                | 1 stage                        | NA                                                 | 3m + 0                                                                                                  | No                                                                                                     | NA<br>Implants<br>were<br>connected<br>to both<br>neighborin<br>g teeth<br>with a<br>fixed<br>suprastruct<br>ure 1<br>month after<br>implant<br>insertion | 0,5 g/day<br>cefalologine<br>intramuscula<br>rly for three<br>days<br>postoperative<br>ly | (1) 2 months<br>after extraction<br>(2) After implant<br>installation<br>(3) 2 weeks after<br>implant<br>installation | (1) 1m<br>(2) 2w<br>(3) 3m minus<br>2w    |                                                                                                                                                                                                                                                |
| 4.<br>Ericsson<br>et al   | 1992      | Dog,<br>Beagle               | Effects of<br>plaque<br>accumulation<br>around<br>implants vs<br>teeth | 5                 | Mandible,<br>right side | Right<br>premolars                                                                                                      | 3m                                          | Split mouth                                                                                                                                                             | Screw shaped<br>(Brånemark)                                                          | NA                                 | Ti              | NA      | Bone level                  | 3 on the<br>right side                                                   | 2-stage                        | NA                                                 | 3m+4m                                                                                                   | No                                                                                                     | Na (No<br>suprastruct<br>ure used)                                                                                                                        | NA                                                                                        | After abutment<br>connection                                                                                          | 4m                                        | Brush and<br>dentifrice<br>daily                                                                                                                                                                                                               |
| 5.<br>Leonhar<br>dt et al | 1992      | Dog,<br>Beagle               | Bacteria<br>around<br>implants vs<br>teeth                             | 4                 | Mandible                | PM1<br>PM2<br>PM3<br>PM4<br>On the<br>right side                                                                        | 3m                                          | Split mouth,<br>implants on<br>left side,<br>teeth on the<br>right                                                                                                      | Screw shaped<br>Brånemark                                                            | NA                                 | Ti              | Turned  | Bone level                  | 2 implants<br>and 2 teeth.<br>Third<br>implant<br>used in<br>Lindhe 1992 | 2-stage                        | NA                                                 | 3m+2m (at<br>which<br>plaque<br>accumulatio<br>n was<br>initiated.<br>Ligatures<br>placed 49d<br>later) | No                                                                                                     | NA (No<br>suprastruct<br>ure)                                                                                                                             | NA                                                                                        | (A) After<br>abutment<br>connection                                                                                   | (A) 2m                                    | (A) Brush<br>and<br>dentifrice<br>daily                                                                                                                                                                                                        |
| 6.<br>Lindhe<br>et al     | 1992      | Dog,<br>Beagle               |                                                                        | 5                 | Mandible                | PM1<br>PM2<br>PM3<br>PM4                                                                                                | 3m                                          | Split mouth,<br>implants on<br>left side,<br>teeth on the<br>right                                                                                                      | Screw shaped<br>Brånemark                                                            | NA                                 | Ti              | Turned  | Bone level                  | 3 on the<br>right side of<br>the<br>mandible                             | 2-stage                        | NA                                                 | 3m+6m                                                                                                   | No                                                                                                     | NA (No<br>suprastruct<br>ure)                                                                                                                             | NA                                                                                        | (A) After<br>abutment<br>connection                                                                                   | (A) 6m                                    | (A) Brush<br>and<br>dentifrice<br>daily                                                                                                                                                                                                        |

|                       |      |                             |                                                                                    |    |                      |                                                                                                                   |     |                                                                                                                                                   |                                                                              |                                                               |                         |                                    |              |                                    |         |    |                                                 |                               |                                                                                                                     |                                                                            |                                                                                                                                            |                                     |                                                                                                                        |
|-----------------------|------|-----------------------------|------------------------------------------------------------------------------------|----|----------------------|-------------------------------------------------------------------------------------------------------------------|-----|---------------------------------------------------------------------------------------------------------------------------------------------------|------------------------------------------------------------------------------|---------------------------------------------------------------|-------------------------|------------------------------------|--------------|------------------------------------|---------|----|-------------------------------------------------|-------------------------------|---------------------------------------------------------------------------------------------------------------------|----------------------------------------------------------------------------|--------------------------------------------------------------------------------------------------------------------------------------------|-------------------------------------|------------------------------------------------------------------------------------------------------------------------|
| 7.<br>Akagawa et al   | 1993 | Monkey, Macaca fuscata      | Ligature vs no ligature on implants and teeth                                      | 9  | Maxilla and mandible | On the right side<br><br>6 (Maxillary lateral incisor, mandibular second premolar and first molar on both sides.) | 3m  | Split mouth with ligatures on one side and plaque control on the other. Also inter-quadrant comparison between teeth and implants inter-quadrant. | Screw-type with integrated abutment for cementum retained restoration        | NA                                                            | Sapphire                | NA                                 | Tissue level | 4 (1 in each quadrant)             | 1 stage | NA | 3m + 0                                          | No                            | NA<br>Implants were connected to both neighboring teeth with a fixed suprastructure 1 month after implant insertion | 0,5 g/day cefalologine intramuscularly for three days postoperatively      | (1) 2 months after extraction<br>(2) After implant installation<br>(3) 2 weeks after implant installation                                  | (1) 1m<br>(2) 2w<br>(3) 3m minus 2w | (1) Brush, interdental brush, electric pencil brush, CHX 0,2%. Interval NA.<br>(2) CHX twice a week<br>(3) same as (1) |
| 8.<br>Grunder et al   | 1993 | Dog, Beagle                 | TREATMENT                                                                          | 10 | Mandible, both sides | 4: 2 in each side of the mandible (PM3, PM4)                                                                      | 6m  | Split-mouth                                                                                                                                       | Screw-shape (Screw-vent, Dentsply)                                           | 3,25x7                                                        | Ti                      | NA                                 | Bone level   | 4: 2 on each side                  | 2-stage | NA | 2m+2m                                           | Yes treatment: toss of a coin | NA (Ti-abutments, loading not mentioned)                                                                            | NA                                                                         | (A) after implantation & after abutment & after peri-implant surgery<br>(B) 1w after abutment connection (D) 1w after peri-implant surgery | (A) 1w<br>(B) 2m<br>(C) 3m          | (A) CHX daily<br>(B) Brush, water, pumise daily<br>(C) same as (B)                                                     |
| 9.<br>Jovanovic et al | 1993 | Dog, Beagle                 | TREATMENT STUDY<br>new bone formation on 3 different surfaces                      | 3  | Mandible             | M1, all PMs                                                                                                       | 12w | 5 implants with mixed surfaces on each side of the mandible                                                                                       | Screw shaped                                                                 | (A) Brånemark 4x10 mm<br>(B) IMZ 4x8 mm<br>(C) Integral4x8 mm | Ti                      | (A) U<br>(B) TPS<br>(C) HA-implant | Bone level   | 10: 5 in each side of the mandible | 1-stage | NA | 0+0m (ligature placed at same time as implants) | No                            | No                                                                                                                  | NA                                                                         | NA                                                                                                                                         | NA                                  | NA                                                                                                                     |
| 10.<br>Lang et al     | 1993 | Monkey, cynomolgus          | Plaque accumulation vs ligature                                                    | 4  | Mandible             | 6: PM2 M1 M2<br>On both sides                                                                                     | 90d | Interquadrant: One implant with ligature and one without in each quadrant                                                                         | Cylindrical ITI type F                                                       | 6,0x3,0 mm)                                                   | Ti                      | TPS                                | Tissue level | 4: 2 on each side of the mandible  | 1-stage | NA | 60d+0d                                          | NA                            | No                                                                                                                  | NA                                                                         | (A) After implant placement<br>(B) From day 60-                                                                                            | (A) 60d<br>(B) 30d                  | (A) Rubber cup and pumice 3 times/ w.<br>(B) Suspended plaque control                                                  |
| 11.<br>Schou et al    | 1993 | Monkey, Macaca Fascicularis | Marginal inflammation around implants vs ankylosed teeth – histologic study of ICT | 8  | Mandible             | M1, M2 on both sides                                                                                              | 12w | Split mouth, ligatures on one side (ligature vs no ligature). Upper jaw vs lower jaw                                                              | Cylindrical, custom made. Collar on ligature implants for ligature retention | 2,5 x 10 mm                                                   | Ti-coated polycarbonate | Ti coated polycarbonate            | Tissuelevel  | 4: 2 on each side                  | 1 stage | -  | 12w + 0                                         | YES                           | No                                                                                                                  | Streptomycin - benzylpenicillin (Streptocillin Vet., 200.000 IE/ml, 1 ml), | (1) 2w before and 2w after extractions<br>(2) 2w before and 8w after implant surgery                                                       | (1) 4w<br>(2) 10w                   | (1) Brush, 2% CHX solution 3 min, 3t/w.<br>(2) same as 1                                                               |

|                        |      |                             |                                                                       |                              |                                  |                                              |     |                                                                                                                                     |                                                                              |             |                         |                                                |              |                                        |         |                                                                   |         |                               |                                          |                                                                                                                                                                 |                                                                                                                                         |                                       |                                                                                            |
|------------------------|------|-----------------------------|-----------------------------------------------------------------------|------------------------------|----------------------------------|----------------------------------------------|-----|-------------------------------------------------------------------------------------------------------------------------------------|------------------------------------------------------------------------------|-------------|-------------------------|------------------------------------------------|--------------|----------------------------------------|---------|-------------------------------------------------------------------|---------|-------------------------------|------------------------------------------|-----------------------------------------------------------------------------------------------------------------------------------------------------------------|-----------------------------------------------------------------------------------------------------------------------------------------|---------------------------------------|--------------------------------------------------------------------------------------------|
| 12.<br>Schou et al     | 1993 | Monkey, Macaca Fascicularis | Marginal inflammation round implants vs ankylosed teeth               | 8                            | Mandible                         | M1, M2 on both sides                         | 12w | (implant, vs tooth)<br><br>Split mouth, liagtures on one side (ligature vs no ligature). Upper jaw vs lower jaw (implant, vs tooth) | Cylindrical, custom made. Collar on ligature implants for ligature retention | 2,5 x 10 mm | Ti-coated polycarbonate | Ti coated polycarbonate                        | Tissuelevel  | 4: 2 on each side                      | 1 stage | -                                                                 | 12w + 0 | YES                           | No                                       | 2h preop. And once a day for 10 d. post op Streptomycin - benzylpenicilin (Streptocillin Vet., 200.000 IE/ml, 1 ml), 2h preop. And once a day for 10 d. post op | (1) 2w before and 2w after extractions (2) 2w before and 8w after implant surgery                                                       | (1) 4w (2) 10w                        | (1) Brush, 2% CHX solution 3 min, 3t/w. (2) same as 1                                      |
| 13.<br>Singh et al     | 1993 | Micro Pig                   | TREATMENT STUDY                                                       | 1 (originally 2, but 1 lost) | Mandible                         | NA                                           | NA  | Inter-quadrant                                                                                                                      | Root-form implant (Nobelpharma, USA, Chicago, IL).                           | NA          | Ti                      | NA                                             | NA           | 6: 3 on each side                      | NA      | NA                                                                | NA      | NA                            | NA                                       | NA                                                                                                                                                              | NA                                                                                                                                      | NA                                    |                                                                                            |
| 14.<br>Lang et al      | 1994 | Dog, Beagle                 |                                                                       | 5                            | Mandible                         | 6: PM2 PM3 PM4 On both sides                 | 4m  |                                                                                                                                     | Cylindrical ITI                                                              | 2,8x6 mm    | Ti                      | TPS                                            | Tissue level | 6: 3 on each side of the mandible      | 1-stage | 4 mm adjacent to neighbouring teeth and 4 mm between the implants | 0+2m    | No                            | No                                       | Penicillin for 5d after implant insertion                                                                                                                       | (A) After tooth extractions (B) 1w after implant insertion                                                                              | (A) 4m (B) 2m                         | (A) Rubber cup and pumice once a week. Soft brush 3 times/ w. (B) same as (A) + CHX 0,12%. |
| 15.<br>Schüpbach et al | 1994 | Dog, Beagle                 | TREATMENT – Implant-tissue interfaces following PI-treatment with GBR | 10                           | Mandible, both sides             | 4: 2 in each side of the mandible (PM3, PM4) | 6m  | Split-mouth                                                                                                                         | Screw-shape (Screw-vent, Dentsply)                                           | 3,25x7      | Ti                      | NA                                             | Bone level   | 4: 2 on each side                      | 2-stage | NA                                                                | 2m+2m   | Yes treatment: toss of a coin | NA (Ti-abutments, loading not mentioned) | NA                                                                                                                                                              | (A) after implantation & after abutment & after peri-implant surgery (B) 1w after abutment connection (D) 1w after peri-implant surgery | (A) 1w (B) 2m (C) 3m                  | (A) CHX daily (B) Brush, water, pumise daily (C) same as (B)                               |
| 16.<br>Weber et al     | 1994 | Dog, beagle                 | NSAID: Inhibition of peri-implant bone loss                           | 2                            | Mandible                         | All PMs and M1 on both sides                 | 3m  | Comparison between animals                                                                                                          | Cylindrical, tissue level (Straumann AG, Walderinburg, Switzerland)          | 2,05 x 8 mm | (1) Ti                  | TPS                                            | Tissue level | 10: 5 on each side                     | 1-stage | NA                                                                | 3m+o    | No                            | No loading                               | Bicillin 600,000 units IM prior to implant insertion                                                                                                            | (a) after surgery (b) 14 days after implant insertion                                                                                   | (a) 2w (b) 2,5m                       | (a) 0,12% CHX rinse daily (b) Brush + 2% CHX gel daily                                     |
| 17.<br>Cook et al      | 1995 | Dog, Mongrel                | 2 implant surfaces                                                    | 14                           | Mandible, implants on both sides | 4 premolars on each                          | 2m  | Interquadra nt                                                                                                                      | Cylindrical (Calicitec implants)                                             | 4x10        | Ti                      | A: Cancellous-structured titanium B: HA-coated | Bone level   | 6 (3 on each side. 2 implants were not | 2-stage | NA                                                                | 8w+0    | NA                            | NA (although no suprastruct              | 5 days postoperatively                                                                                                                                          | None at the test side. At the time of abutment                                                                                          | From abutment surgery to end of study | Weekly brushing                                                                            |

|                            |      |                                       |                                                                                                                                                                                                                                                 |   |                         | side of the<br>mandible                                                                                    |    |                                                                                             |                                          |                               |    |                                                                     |              | inserted due<br>to<br>anatomical<br>reasons)                                                                   |         |                                                                   |                   |                                                                                                                     | ure was<br>used)                            |                                                                                                                | connection on<br>the control side.                                         |                  |                                                                                                                                            |
|----------------------------|------|---------------------------------------|-------------------------------------------------------------------------------------------------------------------------------------------------------------------------------------------------------------------------------------------------|---|-------------------------|------------------------------------------------------------------------------------------------------------|----|---------------------------------------------------------------------------------------------|------------------------------------------|-------------------------------|----|---------------------------------------------------------------------|--------------|----------------------------------------------------------------------------------------------------------------|---------|-------------------------------------------------------------------|-------------------|---------------------------------------------------------------------------------------------------------------------|---------------------------------------------|----------------------------------------------------------------------------------------------------------------|----------------------------------------------------------------------------|------------------|--------------------------------------------------------------------------------------------------------------------------------------------|
| 18.<br>Ericsson            | 1995 | Dog,<br>Labrador                      | Plaque control<br>vs no plaque<br>control                                                                                                                                                                                                       | 5 | Mandible,<br>both sides | 8: 4 each<br>side (1 <sup>st</sup> M,<br>4 <sup>th</sup> PM,<br>3 <sup>rd</sup> PM,<br>2 <sup>nd</sup> PM) | 3m | Interquadra<br>nt                                                                           | Screw shaped<br>(Brånemark)              | 3,75x10                       | Ti | NA                                                                  | Bone level   | 6: 3 on each<br>side                                                                                           | 2-stage | NA                                                                | 3m+3m             | No                                                                                                                  | Na (No<br>suprastruct<br>ure)               | NA                                                                                                             | After abutment<br>connection                                               | 3m               | Brush and<br>dentifrice<br>daily                                                                                                           |
| 19.<br>Hürzeler<br>et al   | 1995 | Dog,<br>Beagle                        | TREATMEN<br>T STUDY 6<br>different<br>treatments                                                                                                                                                                                                | 4 | Mandible                | All<br>mandibula<br>r PMs and<br>M1                                                                        | 3m | Ligatures<br>around all<br>implants                                                         | Screw Shaped                             | 3,75x7<br>mm<br>Brånemar<br>k | Ti | U                                                                   | Bone level   | 6: 3 on each<br>side of the<br>mandible                                                                        | 2-stage | NA                                                                | 3m+2w             | Yes, according to<br>treatment                                                                                      | No.                                         | Yes, after<br>ligature<br>removal.<br>systemic<br>Metronidazol<br>e<br>hydrochlorid<br>e 250mg<br>daily for 3w | (A) After ligature<br>removal<br>(B) After Peri-<br>implantitis<br>surgery | (A) 2w<br>(B) 3w | (A) Daily<br>brushing<br>with flour<br>of pumice<br>mixed<br>with<br>0,12%<br>CHX +<br>0,12%<br>CHX<br>spray. (B)<br>0,12%<br>CHX<br>spray |
| 20.<br>Marinell<br>o et al | 1995 | Dog,<br>Labrador                      | Bone loss at<br>different time<br>intervals from<br>ligature<br>removal                                                                                                                                                                         | 5 | Mandible                | PM3<br>PM4<br>M1<br>On both<br>sides of<br>the<br>mandible                                                 | 3m | Comparison<br>between<br>dogs at<br>different<br>time points<br>from<br>ligature<br>removal | Screw shaped,<br>Brånemark               | 3,75x10<br>mm                 | Ti | NA                                                                  | Bone level   | 4: 2 on each<br>side of the<br>mandible                                                                        | 2-stage | NA                                                                | 3m+6m             | No                                                                                                                  | No                                          | NA                                                                                                             | (A) after<br>abutment surgery                                              | (A) 6m           | (A) tooth<br>and<br>implant<br>cleaning<br>1t/d                                                                                            |
| 21.<br>Warrer<br>et al     | 1995 | Monkey,<br>Macaca<br>Fascicul<br>aris | Bone level<br>and clinical<br>features with<br>ligature or<br>passive plaque<br>accumulation<br>in presence or<br>absence of<br>keratinized<br>mucosa<br>TREATMEN<br>T STUDY                                                                    | 5 | Mandible                | PM2, M1,<br>M2 on<br>both sides                                                                            | 3m | Split mouth                                                                                 | Cylindrical<br>(ITI, Hollow<br>cylinder) | 3x 8 mm                       | Ti | TPS                                                                 | Tissue level | 6: 3 on each<br>side<br>22 implants<br>included in<br>study,<br>remaining<br>implants<br>reported<br>elsewhere | 1-stage | Equal<br>distance<br>between<br>implants and<br>adjacent<br>teeth | 3m and 10d<br>+ 0 | Yes, 8 implants<br>placed in keratinized<br>mucosa and 8 placed<br>in non-keratinized<br>mucosta randomly<br>chosen | No – all<br>placed in<br>infraocclus<br>ion | Penicillin,<br>Procaine<br>Vet. Rosco,<br>0,13 ml/kg<br>the first day<br>post op                               | (A) 10d after<br>implant surgery                                           | (A) 3m           | (A) CHX<br>0,2%<br>applied<br>with soft<br>bristle<br>brush 1t/<br>w.                                                                      |
| 22.<br>Ericsson<br>et al   | 1996 | Dog,<br>Labrador                      | Bone level<br>and clinical<br>features with<br>ligature or<br>passive plaque<br>accumulation<br>in presence or<br>absence of<br>keratinized<br>mucosa<br>TREATMEN<br>T STUDY<br>systemic<br>antibiotics<br>with/without<br>local<br>debridement | 5 | Mandible,<br>both sides | 6: 3 each<br>side (1 <sup>st</sup><br>M, 4 <sup>th</sup><br>PM, 3 <sup>rd</sup><br>PM)                     | 3m | Split mouth                                                                                 | Screw shaped<br>(Brånemark)              | 3,75x10                       | Ti | NA                                                                  | Bone level   | 6: 3 on each<br>side                                                                                           | 2-stage | NA                                                                | 3m+3m             | No                                                                                                                  | NA (No<br>suprastruct<br>ure)               | NA                                                                                                             | Immediately<br>following<br>abutment<br>connection                         | 3m               | Tooth and<br>implant<br>cleaning<br>3times/w                                                                                               |
| 23.<br>Isidor              | 1996 | Monkey,<br>Macaca<br>Fascicul<br>aris | Overload vs<br>ligature                                                                                                                                                                                                                         | 4 | Mandible                | M1, all<br>PMs, all Is                                                                                     | 8m | Split mouth                                                                                 | Screw shaped                             | 3,5x8 mm                      | Ti | 2x TiO2 on one side<br>and symfysis, 2x<br>machined on the<br>other | Bone level   | 5: 2 in each<br>side and 1 in<br>the<br>symphysis                                                              | 2-stage | NA                                                                | 6m+0              | No                                                                                                                  | Yes on the<br>overload<br>side              | NA                                                                                                             | (A) On overload<br>side after fixing<br>the prosthesis                     | (A) 18m          | (A) Brush<br>once/<br>week.<br>Gentel<br>mechanica<br>l cleaning                                                                           |

|                          |      |                                       |                                                                                                    |    |                         |                                                           |     |                                                                                                                                     |                                                                                                                       |                                                           |                                |                            |             |                                                                                                                                                                       |         |    |         |                                |                                                                     |                                                                                                                                                                                                                                       |                                                                                                      |                   |                                                                                                                                                                                                                                                                                                                                                        |
|--------------------------|------|---------------------------------------|----------------------------------------------------------------------------------------------------|----|-------------------------|-----------------------------------------------------------|-----|-------------------------------------------------------------------------------------------------------------------------------------|-----------------------------------------------------------------------------------------------------------------------|-----------------------------------------------------------|--------------------------------|----------------------------|-------------|-----------------------------------------------------------------------------------------------------------------------------------------------------------------------|---------|----|---------|--------------------------------|---------------------------------------------------------------------|---------------------------------------------------------------------------------------------------------------------------------------------------------------------------------------------------------------------------------------|------------------------------------------------------------------------------------------------------|-------------------|--------------------------------------------------------------------------------------------------------------------------------------------------------------------------------------------------------------------------------------------------------------------------------------------------------------------------------------------------------|
| 24.<br>Persson<br>et al. | 1996 | Dog,<br>Labrador                      | TREATMEN<br>T STUDY                                                                                | 5  | Mandible                | PM3,<br>PM4,<br>M1 on<br>both sides<br>of the<br>mandible | 3m  | Split mouth                                                                                                                         | Screw type,<br>Brånemark,<br>Nobel Biocare,<br>Göteborg,<br>Sweden                                                    | 3,75x10<br>mm                                             | Ti                             | U                          | Bonelevel   | 6: 3 on each<br>side                                                                                                                                                  | 2 stage | -  | 3m+3m   | No                             | -                                                                   | 1 month after<br>ligature<br>removal:<br>Amoxicillin<br>375mg x2<br>for 3w<br>Streptomycin<br>-<br>benzylpenicil<br>lin<br>(Streptocillin<br>Vet.,<br>200.000<br>IE/ml, 1 ml),<br>2h preop.<br>And once a<br>day for 10 d.<br>post op | (1) After<br>abutment surgery                                                                        | (1) 3m            | of pockets<br>1/ month<br>(1) tooth<br>and<br>abutment<br>cleaning<br>3t /w.                                                                                                                                                                                                                                                                           |
| 25.<br>Schou et<br>al    | 1996 | Monkey,<br>Macaca<br>Fascicul<br>aris | Marginal<br>inflammation<br>round<br>implants vs<br>ankylosed<br>teeth –<br>Microbiologic<br>study | 8  | Mandible                | M1, M2<br>on both<br>sides                                | 12w | Split mouth,<br>ligatures on<br>one side<br>(ligature vs<br>no ligature).<br>Upper jaw<br>vs lower<br>jaw<br>(implant, vs<br>tooth) | Cylindrical,<br>custom made.<br>Collar on<br>ligature<br>implants for<br>ligature<br>retention                        | 2,5 x 10<br>mm                                            | Ti-coated<br>polycarbo<br>nate | Ti coated<br>polycarbonate | Tissuelevel | 4: 2 on each<br>side                                                                                                                                                  | 1 stage | -  | 12w + 0 | YES                            | No                                                                  |                                                                                                                                                                                                                                       | (1) 2w before<br>and 2w after<br>extractions<br>(2) 2w before<br>and 8w after<br>implant surgery     | (1) 4w<br>(2) 10w | (1) Brush,<br>2% CHX<br>solution 3<br>min, 3t/<br>w.<br>(2) same<br>as 1                                                                                                                                                                                                                                                                               |
| 26. Fritz<br>et al       | 1997 | Monkey<br>(Macaca<br>mulatta)         | Plate-form vs<br>root-form<br>implants vs<br>natural teeth                                         | 36 | Mandible,<br>both sides | All<br>mandibula<br>r molars                              | 6m  | Comparison<br>between<br>animals                                                                                                    | Plate-form<br>Screw-shaped<br>(Osseodent.<br>Collagen<br>Corporation,<br>Palo Alto CA.<br>According to<br>Fritz 1994) | Screw-<br>shaped:<br>3,75x7<br>Plate<br>form:<br>14x7x1,6 | Ti                             | Na                         | Bone level  | 12 natural<br>teeth (2 <sup>nd</sup><br>molar), 11<br>plate-form<br>(2 <sup>nd</sup> molar<br>region, 12<br>root form<br>implants<br>(2 <sup>nd</sup> molar<br>egion) | 2-stage | -  | 6m+12m  | Yes.                           | Yes, Fixed<br>bridge<br>placed min<br>3 m after<br>implantatio<br>n | Penicillin G<br>procaine,<br>300,000 post<br>operatively                                                                                                                                                                              | At the time of<br>suprastructure<br>connection, min<br>6 months after<br>implant<br>installation     | 12m               | Monthly<br>cleaning,<br>polishing<br>of<br>implants<br>and teeth<br>and<br>implant<br>scaling<br>with<br>plastic<br>scaler<br>(A)<br>Brusch +<br>2% CHX<br>daily<br>(B)<br>Brusch+<br>2% CHX<br>3times/w<br>(A) Daily<br>brushing<br>with flour<br>of pumice<br>mixed<br>with<br>0,12%<br>CHX +<br>0,12%<br>CHX<br>spray.<br>(B) 0,12%<br>CHX<br>spray |
| 27.<br>Hanisch<br>et al  | 1997 | Monkey,<br>Macaca<br>Mulatta          | Experimental<br>peri-<br>implantitis                                                               | 4  | Maxilla and<br>mandible | All<br>premolars                                          | 3m  | Maxilla vs<br>mandible                                                                                                              | Cylindrical                                                                                                           | NAx10<br>Bio-vent<br>Dentsply                             | Ti                             | HA-coated                  | Bone level  | 8: 2 in each<br>quadrant                                                                                                                                              | 2-stage | NA | 12m+5m  | No                             | NA (no<br>suprastruct<br>ure)                                       | NA                                                                                                                                                                                                                                    | (A) 2m after<br>abutment<br>connection (B)<br>11m after<br>baseline (1m<br>afterligature<br>removal) | (A) 3m<br>(B) 4w  |                                                                                                                                                                                                                                                                                                                                                        |
| 28.<br>Hürzeler<br>et al | 1997 | Dog,<br>Beagle                        | TREATMEN<br>T STUDY<br>6 different<br>treatments                                                   | 7  | Mandible                | All<br>mandibula<br>r PMs and<br>M1                       | 3m  | Ligatures<br>around all<br>implants                                                                                                 | Screw shaped                                                                                                          | 3,75x7<br>mm<br>Brånemar<br>k                             | Ti                             | U                          | Bone Level  | 6: 3 on each<br>side of the<br>mandible                                                                                                                               | 2-stage | NA | 3m+2w   | Yes, according to<br>treatment | No                                                                  | Yes, after<br>ligature<br>removal.<br>systemic<br>Metronidazol<br>e<br>hydrochlorid<br>e 250mg<br>daily for 3w                                                                                                                        | (A) After ligature<br>removal<br>(B) After Peri-<br>implantitis<br>surgery                           | (A) 2w<br>(B) 3w  |                                                                                                                                                                                                                                                                                                                                                        |

|                                  |      |                                   |                                                                                                                                                              |    |          |                                                                                                                                                                    |    |                                                                              |                                                                         |                                 |                       |                                                                                                                                                                                                       |                                           |                                                |                                                            |    |         |                                                                                                                                    |                                                                                                     |                                                                                                     |                                                                              |                                                                                                                                                          |                                                                                                                                                                                          |
|----------------------------------|------|-----------------------------------|--------------------------------------------------------------------------------------------------------------------------------------------------------------|----|----------|--------------------------------------------------------------------------------------------------------------------------------------------------------------------|----|------------------------------------------------------------------------------|-------------------------------------------------------------------------|---------------------------------|-----------------------|-------------------------------------------------------------------------------------------------------------------------------------------------------------------------------------------------------|-------------------------------------------|------------------------------------------------|------------------------------------------------------------|----|---------|------------------------------------------------------------------------------------------------------------------------------------|-----------------------------------------------------------------------------------------------------|-----------------------------------------------------------------------------------------------------|------------------------------------------------------------------------------|----------------------------------------------------------------------------------------------------------------------------------------------------------|------------------------------------------------------------------------------------------------------------------------------------------------------------------------------------------|
| 29.<br>Isidor                    | 1997 | Monkey,<br>Macaca<br>Fascicularis | Overload vs<br>Ligature                                                                                                                                      | 4  | Mandible | M1, all<br>PMs, all Is                                                                                                                                             | 8m | Split mouth                                                                  | Screw shaped                                                            | 3,5x8 mm                        | Ti                    | 2x TiO2 on one side<br>and symfysis, 2x<br>machined on the<br>other                                                                                                                                   | Bone level                                | 5: 2 in each<br>side and 1 in the<br>symphysis | 2-stage                                                    | NA | 6m+0    | No                                                                                                                                 | Yes on the<br>overload<br>side                                                                      | NA                                                                                                  | (A) On overload<br>side after fixing<br>the prosthesis                       | (A) 18m                                                                                                                                                  | (A) Brush<br>once/<br>week.<br>Gentel<br>mechanica<br>l cleaning<br>of pockets<br>1/ month<br>(A) Brush<br>once/<br>week.<br>Gentel<br>mechanica<br>l cleaning<br>of pockets<br>1/ month |
| 30.<br>Isidor                    | 1997 | Monkey,<br>Macaca<br>Fascicularis | Overload vs<br>Ligature                                                                                                                                      | 4  | Mandible | M1, all<br>PMs, all Is                                                                                                                                             | 8m | Split mouth                                                                  | Screw shaped                                                            | 3,5x8 mm                        | Ti                    | 2x TiO2 on one side<br>and symfysis, 2x<br>machined on the<br>other                                                                                                                                   | Bone level                                | 5: 2 in each<br>side and 1 in the<br>symphysis | 2-stage                                                    | NA | 6m+0    | No                                                                                                                                 | Yes on the<br>overload<br>side                                                                      | NA                                                                                                  | (A) On overload<br>side after fixing<br>the prosthesis                       | (A) 18m                                                                                                                                                  | (A) Brush<br>once/<br>week.<br>Gentel<br>mechanica<br>l cleaning<br>of pockets<br>1/ month                                                                                               |
| 31.<br>Saito et<br>al.           | 1997 | Dog,<br>Mongrel                   | Effects of<br>long-term<br>undisturbed<br>plaque<br>formation on<br>peri-implant<br>tissues. 2<br>implant<br>systems vs<br>teeth                             | 4  | Mandible | PM3,<br>PM4 on<br>both sides                                                                                                                                       | 3m | Split mouth                                                                  | Screw type,<br>(BR)<br>Brånemark and<br>Cylinder type,<br>(IN) Integral | NA                              | Ti                    | NA                                                                                                                                                                                                    | Bone level                                | 4: 2 on each<br>side                           | 2 stage                                                    | -  | 2m+1m   | No                                                                                                                                 | Yes,<br>functional<br>loading by<br>means of a<br>bridge                                            | Single dose<br>of Mycillin<br>at implant<br>placement<br>and abutment<br>connection<br>respectively | (1) after<br>abutment<br>connection                                          | (1) 1m                                                                                                                                                   | (1) brush<br>and 0,12<br>CHX 1t<br>/w.                                                                                                                                                   |
| 32.<br>Tillman<br>ns et al       | 1997 | Dog,<br>Beagle                    | Bone loss<br>around 3<br>different<br>implant<br>systems with<br>and without<br>ligatures                                                                    | 16 | Mandible | PM2,<br>PM3,<br>PM4<br>On both<br>sides                                                                                                                            | 3m | Inter-<br>quarant – 1<br>of each<br>implant<br>type on<br>each side          | (a) cylindrical<br>(b) cylindrical<br>(c) screw-form                    | (a)-(c) 4x<br>10 mm             | (a)-(c) Ti-<br>6A1-4V | (a) Calcitite HA<br>coating (Sulzer<br>Calcitek, Carlsbad,<br>CA)<br>(b) Commercially<br>pure TPS coating<br>(APS Materials,<br>Dayton OH)<br>(c) Machined Ti-<br>alloy surface<br>(Sulzer, Calcitek) | Bone level                                | 6: 3 on each<br>side                           | 2-stage                                                    | NA | 3m+4w   | Yes, one implant of<br>each type randomly<br>placed on each side of<br>the mandible<br><br>Ligature side also<br>randomly selected | No –<br>suprastruct<br>ure on<br>neighbouri<br>ng teeth<br>used to<br>prevent<br>implant<br>loading | NA                                                                                                  | (A) 1m on<br>ligature side.<br>4m on<br>control side<br>(until<br>sacrifice) | (A) Brushing,<br>interprox<br>mal<br>brushing<br>and<br>scaling<br>with<br>graphite<br>scaler<br>3t/w. With<br>sedation<br>every 2w<br>when<br>necessary |                                                                                                                                                                                          |
| 33.<br>Abraha<br>msson<br>et al. | 1998 | Dog,<br>Beagle                    | 3 implant<br>systems: 1.<br>Astra tech<br>Implants,<br>Dental<br>System. 2.<br>Nobel biocare,<br>Brånemark<br>System. 3. ITI<br>dental<br>implants<br>system | 5  | Mandible | All<br>mandibula<br>r<br>premolars.<br>(1 <sup>st</sup> 2 <sup>nd</sup><br>and 3 <sup>rd</sup><br>maxillary<br>molars<br>also<br>extracted<br>to avoid<br>occlusal | 3m | One of each<br>fixture in<br>each<br>quadrant in<br>a<br>randomized<br>order | Screw-type                                                              | 1: 3,5x8<br>2: 3,75x7<br>3: 4x8 | Ti                    | 1: NA (TiOblast?)<br>2: NA<br>(TiUnite?)<br>3: TPS                                                                                                                                                    | 1 and 2:<br>Bonelvel<br>3:<br>Tissuelevel | 6                                              | 1-2: 2-stage<br>(submerged)<br>3: 1-stage<br>(tissuelevel) | NA | 3m + 1m | Yes                                                                                                                                | No                                                                                                  | NA                                                                                                  | After implant<br>installation                                                | 4m                                                                                                                                                       | Daily<br>brushing<br>and<br>dentifrice                                                                                                                                                   |

[illegible]

|                       |      |                             |                                                                         |   |                                   |                                                  |    |                                                            |                                                        |                                           |    |                                                                                                                                                  |              |                                                    |         |    |         |                                  |                                          |                                                            |                                                                       |                             |                                                                                                                                                                                                                                                                                                |
|-----------------------|------|-----------------------------|-------------------------------------------------------------------------|---|-----------------------------------|--------------------------------------------------|----|------------------------------------------------------------|--------------------------------------------------------|-------------------------------------------|----|--------------------------------------------------------------------------------------------------------------------------------------------------|--------------|----------------------------------------------------|---------|----|---------|----------------------------------|------------------------------------------|------------------------------------------------------------|-----------------------------------------------------------------------|-----------------------------|------------------------------------------------------------------------------------------------------------------------------------------------------------------------------------------------------------------------------------------------------------------------------------------------|
| 39.<br>Machado et al  | 1999 | Dog, Mongrel                | TREATMENT STUDY                                                         | 4 | Mandible                          | PM2, PM3, PM4<br>On both sides the mandible      | 3  | Ligatures around all implants, then 4 different treatments | Screw shaped                                           | 8,5x3,75 mm                               | Ti | ?                                                                                                                                                | Bone level   | 4: 2 on each side of the mandible                  | 2-stage | NA | 3m+2w   | (Yes but according to TREATMENT) | No                                       | No (Metronidazole 250mg/day for 3w after ligature removal) | (A) After ligature removal before treatment<br>(B) After PI treatment | (A) 2w<br>(B) 5m            | when necessary (A) Brush and CHX 0,12% daily<br>(B) CHX daily<br>Tooth and abutment cleaning every 2 <sup>nd</sup> day<br>(a) tooth polish with rubber cup and pumice + 0,12% CHX 3t/w.<br>CHX rinse (0,12%) for 2 weeks after implant insertion. Daily brushing with 0,2% CHX gel thereafter. |
| 40.<br>Persson et al. | 1999 | Dog, Beagle                 | TREATMENT STUDY                                                         | 4 | Mandible                          | PM1, PM2, PM3, PM4 on each side                  | 4m | Different positions (inter-quadrant)                       | Screw type, Brånemark, Nobel Biocare, Göteborg, Sweden | 7 mm leangth                              | Ti | U                                                                                                                                                | Bonelevel    | 6: 3 on each side                                  | 2 stage | -  | 4m+2m   | No                               | -                                        | No removal,(Imacillin 250 mg x2) for 3w                    | (1) After abutment surgery                                            | (1) 2m                      | (a) tooth polish with rubber cup and pumice + 0,12% CHX 3t/w.<br>CHX rinse (0,12%) for 2 weeks after implant insertion. Daily brushing with 0,2% CHX gel thereafter.                                                                                                                           |
| 41.<br>Wetzel et al   | 1999 | Dog, Beagle                 | TREATMENT STUDY<br>Guided tissue regeneration with 4 different surfaces | 7 | Mandible                          | PM2, PM3, PM4                                    | 5m | Interquadrant distribution of 4 different surfaces         | Hollow cylinder (ITI,                                  | 2,8 x6 mm                                 | Ti | (1) TPS<br>(2) SLA<br>(3) U<br>(4) TPS with perforation to mimic a furcation                                                                     | Tissue level | 41 implants in total                               | 1-stage | NA | 3m+0    | No                               | NA – no suprastructure                   | During treatment                                           | (a) after tooth extraction until induction of PI                      | (a) 8m                      | CHX rinse (0,12%) for 2 weeks after implant insertion. Daily brushing with 0,2% CHX gel thereafter.                                                                                                                                                                                            |
| 42.<br>Comut et al    | 2000 | Dog, Beagle                 | 3 implant surfaces A-C                                                  | 4 | Mandible, implants on both sides. | 4 premolars and 1 molar on each side of mandible | 3m | Inter-quadrant                                             | Screw shaped ITI                                       | 8x3 mm (top 2 mm was a transmucosal part) | Ti | Identical surfaces except the apical 1 mm of the transmucosal part:<br>A: Machined<br>B: HA-plasma sprayed<br>C: HA-ion beam assisted deposition | Tissue level | 9-10 (39 total in all 4 animals, 4-5 per quadrant) | 1-stage | NA | 3+0     | Yes                              | NA (although no suprastructure was used) | NA                                                         | 2w after implant installation                                         | 3m minus 2w                 | Daily brushing with 0,2% CHX gel thereafter.                                                                                                                                                                                                                                                   |
| 43.<br>Machado et al  | 2000 | Dog, Mongrel                | TREATMENT STUDY                                                         | 5 | Mandible                          | PM2, PM3, PM4<br>On both sides the mandible      | 3  | Ligatures around all implants, then 4 different treatments | Screw shaped                                           | 8,5x3,75 mm                               | Ti | ?                                                                                                                                                | Bone level   | 4: 2 on each side of the mandible                  | 2-stage | NA | 3m+2w   | (Yes but according to TREATMENT) | No                                       | No (Metronidazole 250mg/day for 3w after ligature removal) | (A) After ligature removal before treatment<br>(B) After PI treatment | (A) 2w<br>(B) 5m            | (A) Brush and CHX 0,12% daily<br>(B) CHX daily                                                                                                                                                                                                                                                 |
| 44.<br>Miyata et al   | 2000 | Monkey, Macaca fascicularis | Overload supraocclusion<br>100 µm<br>180 µm<br>250 µm                   | 4 | Mandible, right side              | PM2, M1 on the right side of the mandible        | 3m | Comparison between animals                                 | Cylindrical (IMZ, Friatec, Mannheim, Germany)          | 2,8x8 mm                                  | Ti | NA                                                                                                                                               | Bone level   | 2 on the right side of the mandible                | 2-stage | NA | 3m + 2w | No.                              | Yes – overload                           | NS                                                         | Hygiene start up point not specified                                  | During the whole test phase | Cleaning 1/w under general anesthesia                                                                                                                                                                                                                                                          |
| 45.<br>Nocitiet al.   | 2000 | Dog, Mongrel                | TREATMENT STUDY<br>GBR, bone substitute or both                         | 5 | Mandible                          | PM2, PM3, PM4 one both sides                     | 3m | Each defect randomly allocated to one of 4 treatments      | Screw-type (Napio System, Napio, Bauru, Brazil)        | 3.75x8.5                                  | Ti | AE                                                                                                                                               | Bonelevel    | 4: 2 on each side                                  | 2 stage | NA | 3m+2w   | Yes – according to treatment     | No                                       | After ligature removal: Metronidazole 250mg/ d for 3w      | (1) after ligature removal<br>(2) After peri-implantitis surgery      | (1)2w<br>(2) 5m             | (1)Brush + 0,12% CHX daily<br>(2) 0,12 CHX                                                                                                                                                                                                                                                     |



|                            |       |                              |                                                                     |    |                         |                                                        |     |                                                                   |                                                                                                                       |                                                           |    |                           |                             |                                                                                                                                                                       |         |                                                                 |                                                         |                                 |                                                                     |                                                                                               |                                                                                     |                            |                                                                                                                            |
|----------------------------|-------|------------------------------|---------------------------------------------------------------------|----|-------------------------|--------------------------------------------------------|-----|-------------------------------------------------------------------|-----------------------------------------------------------------------------------------------------------------------|-----------------------------------------------------------|----|---------------------------|-----------------------------|-----------------------------------------------------------------------------------------------------------------------------------------------------------------------|---------|-----------------------------------------------------------------|---------------------------------------------------------|---------------------------------|---------------------------------------------------------------------|-----------------------------------------------------------------------------------------------|-------------------------------------------------------------------------------------|----------------------------|----------------------------------------------------------------------------------------------------------------------------|
| 46.<br>Shibuta<br>ni et al | 2000  | Dog,<br>Beagle               | Ligature<br>induced bone<br>loss with-<br>without IV<br>Pamidronate | 10 | Mandible                | PM2,<br>PM3 on<br>the left<br>side                     | 6m  | Comparison<br>between<br>animals                                  | Screw shape<br>(TiOblast, Astra<br>Tech AB,<br>Mölndal,<br>Sweden)                                                    | 3,5x 11<br>mm                                             | Ti | TiOblast                  | Bone-level                  | 2 per animal                                                                                                                                                          | 2-stage | NA                                                              | 4,5m+3w                                                 | NA                              | No                                                                  | NA                                                                                            | (A) After<br>abutment<br>connection                                                 | (A) 3w                     | spray<br>topically<br>2t/d.<br><br>(A) Brush<br>and 0,12%<br>CHX rinse<br>1t/ w.                                           |
| 47.<br>Deppe<br>et al      | 2001  | Dog,<br>Beagle               | TREATMEN<br>T STUDY                                                 | 6  | Mandible,<br>both sides | NS                                                     | NA  | 1 of 3<br>treatment<br>methods in<br>each<br>hemimandib<br>le     | Cylindrical<br>(Frialit 2)                                                                                            | 3,8x11                                                    | Ti | Ti plasma spray<br>coated | Bone Level                  | 10 5 on each<br>side)                                                                                                                                                 | 2-stage | NA                                                              | 3m+4w                                                   | No                              | NA (no<br>suprastruct<br>ure                                        | NA                                                                                            | At abutment<br>connection                                                           | 4w                         | Oral<br>hygiene                                                                                                            |
| 48.<br>McCrac<br>ken et al | 2001  | Monkey,<br>Macaca<br>Mulatta | Plate-from vs<br>root-form<br>implants vs<br>natural teeth          | 36 | Mandible,<br>both sides | All<br>mandibula<br>r molars                           | 6m  | Comparison<br>between<br>animals                                  | Plate-form<br>Screw-shaped<br>(Osseodent.<br>Collagen<br>Corporation,<br>Palo Alto CA.<br>According to<br>Fritz 1994) | Screw-<br>shaped:<br>3,75x7<br>Plate<br>form:<br>14x7x1,6 | Ti | Na                        | Tissue level                | 24 natural<br>teeth (2 <sup>nd</sup><br>molar), 24<br>plate-form<br>(2 <sup>nd</sup> molar<br>region, 24<br>root form<br>implants<br>(2 <sup>nd</sup> molar<br>egion) | 1-stage | Abutment<br>center 12<br>mm distal to<br>the 2 <sup>nd</sup> PM | Ligatures<br>placed after<br>3m healing<br>+ 2y loading | Yes.                            | Yes, Fixed<br>bridge<br>placed min<br>3 m after<br>implantatio<br>n | Penicillin G<br>procaine,<br>300,000 post<br>operatively                                      | At the time of<br>suprastructure<br>connection, 3m<br>after implant<br>installation | 24m                        | Monthly<br>cleaning,<br>polishing<br>of<br>implants<br>and teeth<br>and<br>implant<br>scaling<br>with<br>plastic<br>scaler |
| 49.<br>Nociti et<br>al.    | 2001a | Mongrel<br>dogs              | Absorbable<br>vs.<br>nonabsorbable<br>membrane in<br>GBR            | 5  | Mandible                | 8: 4 each<br>side<br>(1°PM,<br>2°PM,<br>3°PM,<br>4°PM) | 12w | Split-mouth                                                       | Screw-type<br>(Napio System,<br>Napio, Bauru,<br>Brazil)                                                              | 3.75x8.5                                                  | Ti | AE                        | Tissuelevel<br>(bonelevel?) | 6                                                                                                                                                                     | 2 stage | NA                                                              | 12w + 2w                                                | Yes                             | No                                                                  | At implant<br>surgery (one<br>time), after<br>ligatures<br>removal<br>(3w), after<br>GBR (1w) | (1) After<br>abutment, (2)<br>after removal of<br>ligatures, (3)<br>after GBR       | (1) 2w<br>(2) 3w<br>(3) 5m | (1) NA<br>(2) daily<br>brushing<br>+ CHX<br>(3) CHX<br>2x/day                                                              |
| 50.<br>Nociti et<br>al.    | 2001b | Mongrel<br>dogs              | Teeth vs.<br>implants                                               | 5  | Mandible                | 6: 3 each<br>side<br>(2°PM,<br>3°PM,<br>4°PM)          | 12w | Split-mouth                                                       | Screw-type<br>(Napio System,<br>Napio, Bauru,<br>Brazil)                                                              | 3.75x8.5                                                  | Ti | NA                        | Tissuelevel<br>(bonelevel?) | 4                                                                                                                                                                     | 2 stage | NA                                                              | 12w + 2w                                                | No                              | No                                                                  | NA                                                                                            | After abutment                                                                      | 2w                         | daily<br>brushing<br>+ CHX                                                                                                 |
| 51.<br>Nociti et<br>al.    | 2001c | Mongrel<br>dogs              | Absorbable<br>vs.<br>nonabsorbable<br>membrane in<br>GBR            | 5  | Mandible                | 8: 4 each<br>side<br>(1°PM,<br>2°PM,<br>3°PM,<br>4°PM) | 12w | Split-mouth                                                       | Screw-type<br>(Napio System,<br>Napio, Bauru,<br>Brazil)                                                              | 3.75x8.5                                                  | Ti | AE                        | Tissuelevel<br>(bonelevel?) | 6                                                                                                                                                                     | 2 stage | NA                                                              | 12w + 2w                                                | Yes                             | No                                                                  | after ligature<br>removal<br>(3w), after<br>GBR (1w)                                          | (1) After<br>abutment, (2)<br>after GBR                                             | (1) 2w<br>(2) 5m           | (1) daily<br>brushing<br>+ CHX<br>(2) CHX<br>2x/day                                                                        |
| 52.<br>Nocitiet<br>al      | 2001d | Dog,<br>Mongrel              | TREATMEN<br>T STUDY of<br>4 treatments                              | 5  | Mandible                | All PMs<br>on both<br>sides                            | 3m  | Each defect<br>randomly<br>allocated to<br>one of 4<br>treatments | Screw-type<br>(Napio System,<br>Napio, Bauru,<br>Brazil)                                                              | 3.75x8.5                                                  | Ti | AE                        | Bonelevel                   | 4: 2 on each<br>side                                                                                                                                                  | 2 stage | NA                                                              | 3m+2w                                                   | Yes – according to<br>treatment | No                                                                  | After ligature<br>removal:<br>Metronidazol<br>e 250mg/ d<br>for 3w                            | (1) after ligature<br>removal<br>(2) After peri-<br>implantitis<br>surgery          | (1)2w<br>(2) 5m            | (1)Brush<br>+ 0,12%<br>CHX<br>daily<br>(2) 0,12<br>CHX<br>spray<br>topically<br>2t/d.                                      |

|                             |       |                                       |                                                                                                          |   |                         |                                                                             |     |                                                |                                                                     |                                                  |    |                                                      |              |                                              |         |    |         |                                |                                                       |                                                                                                                                                         |                                                                                                         |                                                                                              |                                                                               |
|-----------------------------|-------|---------------------------------------|----------------------------------------------------------------------------------------------------------|---|-------------------------|-----------------------------------------------------------------------------|-----|------------------------------------------------|---------------------------------------------------------------------|--------------------------------------------------|----|------------------------------------------------------|--------------|----------------------------------------------|---------|----|---------|--------------------------------|-------------------------------------------------------|---------------------------------------------------------------------------------------------------------------------------------------------------------|---------------------------------------------------------------------------------------------------------|----------------------------------------------------------------------------------------------|-------------------------------------------------------------------------------|
| 53.<br>Persson<br>et al.    | 2001a | Beague<br>dogs                        | Turned x SLA<br>surface                                                                                  | 4 | Mandible                | 8: 4 each<br>side (1°M,<br>2°PM,<br>3°PM,<br>4°PM)<br>10: 5 each<br>side    | 12m | Split-mouth                                    | Screw-type (ITI<br>Straumann,<br>Waldenburg,<br>Switzerland)        | 3.3x8.0                                          | Ti | U (left side)<br>SA (right side)                     | Tissuelevel  | 6                                            | 1 stage | -  | 3m + 0  | No                             | -                                                     | 5 weeks after<br>removal of<br>ligatures, for<br>17 days                                                                                                | (1) After implant<br>installation; (2) 1<br>month after<br>treatment                                    | (1) 3m<br>(2x/week);<br>(2) 6m                                                               | (1) and (2)<br>Tooth and<br>implant<br>cleaning                               |
| 54.<br>Persson<br>et al.    | 2001b | Labrador<br>dogs                      | 1 part x 2<br>parts implant                                                                              | 2 | Mandible                | 1°PM,<br>2°PM,<br>3°PM,<br>4°PM,<br>1°M)                                    | 3m  | Different<br>positions                         | Screw-type<br>(Brånemark,<br>Nobel Biocare,<br>Göteborg,<br>Sweden) | 10 mm                                            | Ti | U                                                    | Bonelevel    | 8                                            | 2 stage | -  | 4m + 5m | No                             | -                                                     | 15 months<br>after ligature,<br>for 3 weeks                                                                                                             | NP                                                                                                      | NP                                                                                           | NP                                                                            |
| 55.<br>Schou et<br>al       | 2001  | Monkey,<br>Macaca<br>Fascicul<br>aris | Probe tip<br>position<br>around<br>implants vs<br>teeth at health,<br>mucositis and peri-<br>implantitis | 8 | Mandible<br>and Maxilla | M1 OR<br>PM1&<br>PM2                                                        | 3m  | Split mouth                                    | Screw type,<br>Astra tech with<br>customized<br>transmuosal<br>part | 7x4 mm +<br>4 mm<br>transmuco<br>sal part.       | Ti | U                                                    | Tissuelevel  | 4: 1 in each<br>quadrant                     | 1 stage | -  | 3m+0    | YES and blinded<br>observation | No                                                    | Streptomycin<br>-<br>benzylpenicil<br>lin<br>(Streptocillin<br>Vet.,<br>200.000<br>IE/ml, 1 ml),<br>2h preop.<br>And once a<br>day for 10 d.<br>post op | (1) 2w before<br>and 2w after<br>extractions<br>(2) 2w before<br>implant<br>placement until<br>3m after | (1) 4w<br>(2) 2w+3m                                                                          | (1) and (2)<br>Brush,<br>curretage,<br>1% CHX<br>solution 3<br>min, 3t/<br>w. |
| 56.<br>Deppe<br>et al       | 2002  | Dog,<br>Beagle                        | TREATMEN<br>T STUDY<br>Ti release<br>related to CO <sub>2</sub><br>laser treatment                       | 6 | Mandible,<br>both sides | NS                                                                          | NA  | Split mouth                                    | Cylindrical<br>(Frialt 2)                                           | 3,8x11                                           | Ti | Ti plasma spray<br>coated                            | Bone level   | 10 (5 on<br>each side)                       | 2-stage | NA | 3m+4w   | No                             | NA<br>(although<br>no suprastruct<br>ure was<br>used) | NA                                                                                                                                                      | At abutment<br>connection                                                                               | 4w                                                                                           | Oral<br>hygiene                                                               |
| 57.<br>Gotfreds<br>en et al | 2002  | Dog,<br>beagle                        | Loading vs<br>non-loading.<br>SLA vs turned<br>surface                                                   | 5 | Mandible,<br>both sides | 8: 4 in<br>each side<br>of the<br>mandible<br>(PM1,<br>PM2,<br>PM3,<br>PM4) | 12w | Split-mouth                                    | Screw-shape<br>(Straumann<br>tissue level)                          | 3,3x8                                            | Ti | (SLA) sandblasted<br>and acid-etched<br><br>(TURNED) | Tissue level | 6: 3 on each<br>side                         | 1-stage | NA | 0+12w   | No                             | Yes                                                   | NA                                                                                                                                                      | 2w after<br>implantation                                                                                | 10w                                                                                          | Brush and<br>CHX gel<br>1% daily                                              |
| 58.<br>Miyata<br>et al      | 2002  | Monkey,<br>Macaca<br>fascicula<br>ris | Overload                                                                                                 | 4 | Mandible,<br>right side | PM2, M1<br>on the<br>right side<br>of the<br>mandible                       | 3m  | Comparison<br>between<br>animals               | Cylindrical<br>(IMZ, Friatec,<br>Mannheim,<br>Germany)              | 2,8x8 mm                                         | Ti | NA                                                   | Bone level   | 2 on the<br>right side of<br>the<br>mandible | 2-stage | NA | 3m + 2w | No.                            | Yes –<br>overload                                     | NS                                                                                                                                                      | Hygiene start up<br>point not<br>specified                                                              | During the<br>whole test<br>phase but<br>varying for<br>different<br>implant. See<br>table 2 | Cleaning<br>1/w under<br>general<br>anesthesia                                |
| 59.<br>Schou et<br>al       | 2002  | Monkey,<br>Macaca<br>Fascicul<br>aris | TREATMEN<br>T STUDY                                                                                      | 8 | Mandible<br>and Maxilla | Some Ms<br>and PMs                                                          | 3m  | Different<br>treatments<br>in all<br>quadrants | Screw type,<br>Straumann<br>Tissue level,<br>custom type            | 2.8 x 8<br>mm + 3<br>mm<br>transmuco<br>sal part | Ti | TPS at bone part and<br>smooth<br>transmucosal part  | Tissuelevel  | 8: 2 in each<br>quadrant                     | 1 stage | -  | 3m+0    | YES, according to<br>treatment | No                                                    | Metronidazol<br>e 13 mg/ kg<br>x3/ d and<br>ampicillin<br>17mg/ kg x3/<br>d. From 2d<br>before<br>surgery to<br>10d after.                              | Yes, but not<br>further specified.<br>Terminated at<br>ligature<br>placement                            | NA                                                                                           | NA                                                                            |

|                     |      |                             |                                                                        |   |                      |                                  |    |                                                             |                                                                                                                                                                                      |                                             |    |                                                                                                                                                            |             |                                                     |         |    |           |                                                       |                                           |                                                                                                   |                                                          |                                                                    |                                                                                          |
|---------------------|------|-----------------------------|------------------------------------------------------------------------|---|----------------------|----------------------------------|----|-------------------------------------------------------------|--------------------------------------------------------------------------------------------------------------------------------------------------------------------------------------|---------------------------------------------|----|------------------------------------------------------------------------------------------------------------------------------------------------------------|-------------|-----------------------------------------------------|---------|----|-----------|-------------------------------------------------------|-------------------------------------------|---------------------------------------------------------------------------------------------------|----------------------------------------------------------|--------------------------------------------------------------------|------------------------------------------------------------------------------------------|
| 60.<br>Schou et al  | 2002 | Monkey, Macaca Fascicularis | TREATMENT STUDY                                                        | 8 | Mandible and Maxilla | Some Ms and PMs                  | 3m | Different treatments in all quadrants                       | Screw type, Straumann Tissue level, custom type                                                                                                                                      | 2.8 x 8 mm + 3 mm transmucosal part         | Ti | TPS at bone part and smooth transmucosal part                                                                                                              | Tissuelevel | 8: 2 in each quadrant                               | 1 stage | -  | 3m+0      | YES, according to treatment                           | No                                        | Metronidazole 13 mg/ kg x3/ d and ampicillin 17mg/ kg x3/ d. From 2d before surgery to 10d after. | After implant surgery                                    | 3m                                                                 | Cleaning 3t/ w.                                                                          |
| 61.<br>Schou et al  | 2002 | Monkey, Macaca Fascicularis | TREATMENT STUDY: Autogenous bone graft and ePTFE                       | 8 | Mandible and Maxilla | PM1, PM2 and M2 in each quadrant | 3m | Different treatments in all quadrants                       | Screw type, Straumann Tissue level, custom type                                                                                                                                      | 2.8 x 8 mm + 3 mm transmucosal part         | Ti | TPS at bone part and smooth transmucosal part                                                                                                              | Tissuelevel | 8: 2 in each quadrant                               | 1 stage | -  | 3m + 0    | YES                                                   | No                                        | Yes, Metronidazole during PI TREATMENT                                                            | (1) 2w before and until 3m after extractions             | (1) 4w                                                             | (1) Brush, 2 % CHX solution 3 min, 3t/ w.                                                |
| 62.<br>Schou et al  | 2002 | Monkey, Macaca Fascicularis | TREATMENT STUDY: Autogenous bone graft and ePTFE                       | 8 | Mandible and Maxilla | PM1, PM2 and M2 in each quadrant | 3m | Different treatments in all quadrants                       | Screw type, Straumann Tissue level, custom type                                                                                                                                      | 2.8 x 8 mm + 3 mm transmucosal part         | Ti | TPS at bone part and smooth transmucosal part                                                                                                              | Tissuelevel | 8: 2 in each quadrant                               | 1 stage | -  | 3m + 0    | YES                                                   | No                                        | Yes, Metronidazole during PI TREATMENT                                                            | (1) 2w before and until 3m after extractions             | (1) 4w                                                             | (1) Brush, 2 % CHX solution 3 min, 3t/ w.                                                |
| 63.<br>Shibli et al | 2003 | Dog, Mongrel                | Microbiology and bone loss after ligatures around 4 different implants | 6 | Mandible             | All mandibular and maxillary PMs | 3m | Inter-quadrant                                              | Screw-shape (1) Commercially pure Ti (3i) (2) TPS (ITI/ Straumann, Esthetic plus (3) HA-coated (Calcitek) (4) Hybrid: first 3 threads machined, the rest acid etched (Osseotite, 3i) | (1), (3), (4): 3,75 x 10 mm (2) 4,1 x 10 mm | Ti | (1) Turned (3i) (2) TPS (ITI/ Straumann, Esthetic plus (3) HA-coated (Calcitek) (4) Hybrid: first 3 threads machined, the rest acid etched (Osseotite, 3i) | Bone-level  | 6: 3 on each side                                   | 2-stage | NA | 90d + 45d | Yes, at least one implant of each kind in each animal | No                                        | Potassium and sodium benzyl penicillin once/w for 2w postoperatively                              | (A) 2w before extraction (B) After tooth extraction      | (A) at one time (B) 225d (until 45 days after abutment connection) | (A) Oral hygiene (B) Scrubbing with 0,12 % CHX daily and scaling and root planning 1t/m. |
| 64.<br>Shibli et al | 2003 | Dog, Mongrel                | TREATMENT STUDY                                                        | 6 | Mandible             | All PMs on both sides            | 3m | Inter-quadrant                                              | Screw-shape (1) Commercially pure Ti (3i) (2) TPS (ITI/ Straumann, Esthetic plus (3) HA-coated (Calcitek) (4) Hybrid: first 3 threads machined, the rest acid etched (Osseotite, 3i) | NA                                          | Ti | (1) Turned (3i) (2) TPS (ITI/ Straumann, Esthetic plus (3) HA-coated (Calcitek) (4) Hybrid: first 3 threads machined, the rest acid etched (Osseotite, 3i) | Bonelevel   | 19 implants in this study but 36 implants installed | 2-stage | NA | 3m+2m     | NA                                                    | NA – although no suprastructure           | NA (peri-operative drug administration not specified)                                             | (A) after abutment connection (B) After ligature removal | (A) 2m (B) 12m                                                     | (A) not specified (B) daily scrubbing with 0,12% CHX                                     |
| 65.<br>Shibli et al | 2003 | Dog, Mongrel                | TREATMENT STUDY: Lethal photosensitization and GBR                     | 6 | Mandible             | All mandibular and maxillary PMs | 3m | No control group – all implants received the same treatment | Screw-shape (1) Commercially pure Ti (3i) (2) TPS (ITI/ Straumann, Esthetic plus                                                                                                     | (1), (3), (4): 3,75 x 10 mm (2) 4,1 x 10 mm | Ti | (1) Turned (3i) (2) TPS (ITI/ Straumann, Esthetic plus (3) HA-coated (Calcitek)                                                                            | Bone-level  | 6: 3 on each side                                   | 2-stage | NA | 90d + 45d | Yes, at least one implant of each kind in each animal | No – upper PMs extracted to avoid loading | Potassium and sodium benzyl penicillin once/w for 2w                                              | (A) 2w before extraction (B) After tooth extraction      | (A) at one time (B) 225d (until 45 days after                      | (A) Oral hygiene (B) Scrubbing with 0,12 % CHX                                           |

|                    |      |              |                                                                                                                                                                                                             |   |                      |                                                                                                           |    |                                                                                 |                                                                                                         |                |                                                                             |                                                                   |                                            |                                                 |                                    |    |                          |                                                    |                                                          |                                                                           |                                                             |                                                                  |                                                                     |
|--------------------|------|--------------|-------------------------------------------------------------------------------------------------------------------------------------------------------------------------------------------------------------|---|----------------------|-----------------------------------------------------------------------------------------------------------|----|---------------------------------------------------------------------------------|---------------------------------------------------------------------------------------------------------|----------------|-----------------------------------------------------------------------------|-------------------------------------------------------------------|--------------------------------------------|-------------------------------------------------|------------------------------------|----|--------------------------|----------------------------------------------------|----------------------------------------------------------|---------------------------------------------------------------------------|-------------------------------------------------------------|------------------------------------------------------------------|---------------------------------------------------------------------|
|                    |      |              |                                                                                                                                                                                                             |   |                      |                                                                                                           |    |                                                                                 | (3) HA-coated (Calcitek)<br>(4) Hybrid: first 3 threades machined, the rest acid etched (Osseotite, 3i) |                | (4) Hybrid: first 3 threades machined, the rest acid etched (Osseotite, 3i) |                                                                   |                                            |                                                 |                                    |    |                          |                                                    | postoperative ly                                         | (C) After ligature removal                                                | abutment connection)<br>(C) 12m                             | daily and scaling and root planning 1t/m.<br><br>(C) same as (B) |                                                                     |
| 66. Zechner        | 2003 | Dog, Mongrel | (A) One stage and two stage surgery compared<br>(1) 1-stage with integrated abutment<br>(2) 1-stage with screw retained abutment<br>(3) 2-stage with screw retained abutment<br>(B) Ligature vs no ligature | 8 | Mandible             | All PMs and M1 on both sides of the mandible                                                              | 3m | Interquadra nt (implants and technique) and split mouth (ligatures on one side) | Cylinder type – Custom made by Friatec, Friedrichsfeld, Germany                                         | All 3,5 x10 mm | Ti                                                                          | TPS and 1mm polished collar                                       | (1) Tissue level<br>(2) and (3) Bone level | 48 in total, but only 23 reported in this study | (1) and (2) 1-stage<br>(3) 2-stage | NA | (3) 3m+1m (1) & (2) 4m+0 | Yes, random placement of 3 different implant types | Functional loading by means of high plastic healing caps | NA                                                                        | (A) after abutment surgery                                  | (A) 1m (2-stage) and 4m (1-stage)                                | (A) Brush with 0,2% CHX gel 3-4t/ w and 0,12% CHX rinse every 2w.   |
| 67. Deppe et al    | 2004 | Dog, Beagle  | Assessment of reliability of 3 bone attachment measurement methods                                                                                                                                          | 6 | Mandible, both sides | NS                                                                                                        | 3m | Reliability of 2 X-ray methods and pressure-forced probing,                     | Cylindrical (Frialit 2)                                                                                 | 3,8x11         | Ti                                                                          | Ti plasma spray coated                                            | Bone level                                 | 10 (5 on each side)                             | 2-stage                            | NA | 12w+4w                   | NA                                                 | NA (no suprastruct ure)                                  | NA                                                                        | At abutment connection                                      | 4w                                                               | Oral hygiene                                                        |
| 68. Martins et al. | 2004 | Dog, Mongrel | 4 surfaces                                                                                                                                                                                                  | 6 | Mandible             | 8 premolars (4/side). (maxillary also extracted to avoid occlusal trauma interference)<br>10: 5 each side | 3m | ≥ one of each implant in each animal                                            | Screw-type                                                                                              | 3,75x10 4,1x10 | Ti                                                                          | TPS, HA, U + AE (U in 3 first threads and AE in other threads), U | Bone level                                 | 6: 3 on each side of the mandible               | 2 stage (submerged)                | 10 | 3m + 45d                 | No                                                 | No                                                       | 24000 IU/kg benzylpenicil lum 1x/week for 2 weeks after implant placement | Before PI                                                   | 9,5 (2 weeks before extraction to ligature placement.)           | Daily chlorhexid ine scrubbing + Scaling and root planning 1x/month |
| 69. Persson et al. | 2004 | Beague dogs  | Turned x SLA surface                                                                                                                                                                                        | 4 | Mandible             | (1°PM, 2°PM, 3°PM, 4°PM, 1°M)                                                                             | 3m | Split-mouth                                                                     | Screw-type (ITI Straumann, Waldenburg, Switzerland)                                                     | 3.3x8.0        | Ti                                                                          | U (left side) SA (right side)                                     | Tissuelevel                                | 6                                               | 1 stage                            | -  | 3m + 0                   | No                                                 | -                                                        | 1 month after removal of ligatures, for 17 days                           | (1) After implant installation; (2) 5 weeks after treatment | (1) 3m (2x/week); (2) 5m                                         | (1) and (2) Tooth and implant cleaning                              |

|                            |      |                               |                                                                                                                                       |   |          |                                                                                                                       |                              |                                                              |                                                                                              |                                                 |    |                                                                            |              |                                         |                        |                                                               |                                                                             |                                                                 |                                                                     |                                                                                                                                                                                                                                    |                                     |                                                                                   |                                                                                                                     |
|----------------------------|------|-------------------------------|---------------------------------------------------------------------------------------------------------------------------------------|---|----------|-----------------------------------------------------------------------------------------------------------------------|------------------------------|--------------------------------------------------------------|----------------------------------------------------------------------------------------------|-------------------------------------------------|----|----------------------------------------------------------------------------|--------------|-----------------------------------------|------------------------|---------------------------------------------------------------|-----------------------------------------------------------------------------|-----------------------------------------------------------------|---------------------------------------------------------------------|------------------------------------------------------------------------------------------------------------------------------------------------------------------------------------------------------------------------------------|-------------------------------------|-----------------------------------------------------------------------------------|---------------------------------------------------------------------------------------------------------------------|
| 70.<br>Zitzman<br>n et al  | 2004 | Dog,<br>Labrador              | Progression av<br>PI after<br>ligature<br>removal                                                                                     | 5 | Mandible | All PMs<br>snd M1 on<br>both sides                                                                                    | 3m                           | Ligatures<br>around all<br>implants                          | Screw type<br>(Brpnmemark,<br>Nobel biocare)                                                 | 3,75 x10<br>mm                                  | Ti | NA                                                                         | Bone level   | 22 implants<br>in 5 dogs                | 2-stage                | NA                                                            | 4m+5m                                                                       | No                                                              | NA-no<br>suprastruct<br>ure                                         | NA                                                                                                                                                                                                                                 | (A) after<br>abutment surgery       | (A) 5m                                                                            | (A)<br>Brusch<br>and<br>dentifrice<br>5t/w                                                                          |
| 71.<br>Hayek<br>et al      | 2005 | Dog,<br>Labrador<br>Retriever | TREATMEN<br>T –<br>Photodynamic<br>- vs<br>conventional<br>therapy                                                                    | 9 | Mandible | PM3 on<br>both sides                                                                                                  | 0(immediate<br>installation) | Split mouth                                                  | Screw-shaped                                                                                 | NA<br>Conexao<br>System,<br>Sao Paolo<br>Brazil | Ti | AE                                                                         | Bone level   | 2: 1 in each<br>side of the<br>mandible | 2-stage                | -                                                             | 3m+0m (PI<br>induction<br>and<br>abutment<br>connection<br>at same<br>time) | Yes-according to<br>treatment                                   | NA (no<br>suprastruct<br>ure)                                       | NA                                                                                                                                                                                                                                 | None (only<br>submerged<br>healing) | -                                                                                 | -                                                                                                                   |
| 72.<br>Martins<br>et al    | 2005 | Dog,<br>Mongrel               | 4 surfaces                                                                                                                            | 6 | Mandible | 8<br>premolars<br>(4/side).<br>(maxillary<br>also<br>extracted<br>to avoid<br>occlusal<br>trauma<br>interferen<br>ce) | 3m                           | ≥ one of<br>each<br>implant in<br>each animal                | Screw-type                                                                                   | 3,75x10<br>4,1x10                               | Ti | TPS, HA, U + AE<br>(U in 3 first threads<br>and AE in other<br>threads), U | Bone level   | 6: 3 on each<br>side of the<br>mandible | 2 stage<br>(submerged) | 10                                                            | 3m + 45d                                                                    | No                                                              | No                                                                  | 24000 IU/kg<br>benzylpenicil<br>lum 1x/week<br>for 2 weeks<br>post op (after<br>implant<br>placement –<br><u>OTHERWISE, POST-OP.<br/>OF WHICH SURGERY?<br/>THIS MIGHT BE<br/>CONFUSING FOR THE<br/>READER IF NOT<br/>INDICATED</u> | (A) Before PI<br>(B) After PI       | (A) 9,5 (2<br>weeks before<br>extraction to<br>ligature<br>placement.)<br>(B) 12m | (A) Daily<br>chlorhexid<br>ine<br>scrubbing<br>+<br>Scaling<br>and root<br>planning<br>1x/month<br>(B) same<br>as A |
| 73.<br>Sennerb<br>y et al. | 2005 | Dog,<br>Beagle                | Implant<br>stability<br>during<br>initiation and<br>resolution of<br>exp.<br>Periimplantitis                                          | 4 | Mandible | 8: PM1,<br>PM2,<br>PM3,<br>PM4 on<br>both sides                                                                       | 12m                          | Split mouth                                                  | Screw type (ITI<br>Dental implant<br>system,<br>Straumann AG,<br>Waldenburg,<br>Switzerland) | 3,3x8                                           | Ti | Sand-blasted, acid<br>etched (SLA) or U                                    | Tissue level | 6: 3 on each<br>side                    | 1-stage                | NA                                                            | 3m+0                                                                        | No, SLA on right<br>side. U on left side.                       | NA – no<br>suprastruct<br>ure used                                  | NA – No<br>specification<br>of<br>perioperative<br>drugs                                                                                                                                                                           | (A) After implant<br>insertion      | (A) 3m                                                                            | (A)<br>Implants<br>and teeth<br>cleaned 2t<br>/w.                                                                   |
| 74.<br>Stübing<br>er et al | 2005 | Dog,<br>Bealge                | TREATMEN<br>T STUDY<br>CO2 LASER                                                                                                      | 6 | Mandible | NA<br>(molar<br>and<br>premolar<br>region)                                                                            | NA                           | 1 of 3<br>different<br>treatments<br>per<br>hemimandib<br>le | Cylindrical<br>(stepped)<br>Frialit-2<br>(Friadent,<br>Mannheim,<br>Germany)                 | 3,8 x11<br>mm                                   | Ti | TPS                                                                        | Bonelevel    | 10: 5 on<br>each side                   | 2-stage                | NA                                                            | 3m+0                                                                        | No                                                              | NA                                                                  | NA                                                                                                                                                                                                                                 | (A) After implant<br>surgery        | (A)3m                                                                             | (A) oral<br>hygiene,<br>not further<br>specified                                                                    |
| 75.<br>Trejo et<br>al      | 2005 | Monkey,<br>Cynomol<br>gus     | Effect of<br>different<br>hygiene<br>techniques on<br>mucositis and<br>CAL. 3<br>maintenace<br>protocols after<br>ligature<br>removal | 9 | Mandible | PM2, M1,<br>M2 on<br>both sides                                                                                       | 4m                           | Comparison<br>between<br>animals                             | Screw-shape<br>(ITI, tissue<br>level)                                                        | 3,3x 8 mm                                       | Ti | Ti plasma coated                                                           | Tissue level | 4: 2 on each<br>side                    | 1-stage                | At least 3<br>mm between<br>implants and<br>adjacent<br>teeth | 90d+0d                                                                      | Yes, monkeys<br>randomly distributed<br>to different treatments | No – cover<br>screws not<br>used in<br>order to<br>avoid<br>contact | NA                                                                                                                                                                                                                                 | (A) After implant<br>surgery        | (A) 90d                                                                           | (A) 0,12%<br>CHX<br>spray and<br>brushing<br>every 2d                                                               |

|                        |      |                                |                                                                                              |   |                                 |                                              |    |                                                                                                  |                                                                                                                                                                                  |                                                   |                         |                                                                                                                                    |              |                                   |         |            |                                               |                                                         |                                                                                                      |                                                                                             |                                                                                          |                              |                                                                         |
|------------------------|------|--------------------------------|----------------------------------------------------------------------------------------------|---|---------------------------------|----------------------------------------------|----|--------------------------------------------------------------------------------------------------|----------------------------------------------------------------------------------------------------------------------------------------------------------------------------------|---------------------------------------------------|-------------------------|------------------------------------------------------------------------------------------------------------------------------------|--------------|-----------------------------------|---------|------------|-----------------------------------------------|---------------------------------------------------------|------------------------------------------------------------------------------------------------------|---------------------------------------------------------------------------------------------|------------------------------------------------------------------------------------------|------------------------------|-------------------------------------------------------------------------|
| 76.<br>Watzak et al    | 2005 | Monkey, baboon (Papio ursinus) | Bone loss around 3 different implant types after 18m functional loading without oral hygiene | 9 | Maxilla and mandible            | M1, M2 on both sides of maxilla and mandible | 7m | Split mouth: 1-implant type per quadrant. All implant designs used in all animals                | (1) Screw shaped (Brånemark MKII, Nobel Biocare Göteborg, Sweden)<br>(2) Screw shaped (Frialen 20-0340, Friatec Mannheim, Germany)<br>(3) Cylindrical (Frialen 20-0140, Friatec) | All 3,75 mm diameter.<br><br>All 10-13 mm leangth | (1) Ti<br>(2) Ti<br>(3) | (1) U (Ra 0,53 micrometer)<br>(2) Sandblasted + AE (Ra 2,1 micrometer)<br>(3) TPS                                                  | Bone level   | 12: 3 in each quadrant            | 2-stage | NA         | 8m+1m (induction by plaque accumulation only) | No                                                      | Yes – functional loading assured by fixted partial denture splinting all 3 implants in each quadrant | No                                                                                          | NA                                                                                       | NA                           | NA                                                                      |
| 77.<br>Berglundh et al | 2006 | Dog, Beagle                    | 2 surfaces                                                                                   | 5 | Mandible, both premolar regions | All mandibular premolars                     | 3m | Split mouth                                                                                      | Screw shaped. Straumann SP                                                                                                                                                       | 3,3x8                                             | Ti                      | Sandblasted Acid Eched Vs Polished                                                                                                 | Tissue level | 6                                 | 1-stage | NA         | 3 months and 2 weeks + 0                      | No                                                      | No (Not specifically stated, no extraktion of antagonizing teeth reported)                           | NA                                                                                          | 2w after implant installation                                                            | 3m minus 2w                  | Daily cleaning of implants and teeth with toothbrush and 0,12% CHX gel. |
| 78.<br>Kozlovsky et al | 2006 | Dog, Beagle                    | Overloading in healthy or inflamed peri-implant tissue                                       | 4 | Mandible                        | 8: PM1 PM2 PM3 PM4 On both sides             | 3m | Ligatures on one side. 2 posterior implants loaded and 2 anterior implants unloaded on each side | Screw shaped Hi-Tec Implant Ltd., Herzliya, Israel                                                                                                                               | 3,75x10 mm                                        | Ti                      | U                                                                                                                                  | Bone level   | 8: 4 in each side of the mandible | 2-stage | NA         | 3m+3w                                         | No                                                      | Yes                                                                                                  | 20mg/kg Benzanthine Penicillin G (2% chanazine) as pre-medication before implant placement. | (A) After abutment surgery<br>(B) On control side after ligature placement on other side | (A) 3w<br>(B) 12m            | (A) 0,2% CHX swabbing 3 times/w<br>(B) 0,2% CHX brushing 3 times/w      |
| 79.<br>Schwarz et al   | 2006 | Dog, Beagle                    | TREATMENT STUDY: Submerged vs non-submerged healing                                          | 5 | Mandible, both sides            | PM2, PM3, PM4, M1 on both sides              | 4m | Split mouth                                                                                      | Screw-shape (Straumann SP, NN, SLA,                                                                                                                                              | 3,3x10                                            | Ti                      | SLA                                                                                                                                | Tissue level | 6: 3 on each side                 | 1-stage | 8 mm apart | 3m+0                                          | Yes according to treatment, computer generated protocol | No                                                                                                   | No                                                                                          | (A) after implant surgery                                                                | (A) 3m                       | (A) Brush daily                                                         |
| 80.<br>Shibli et al    | 2006 | Dog, Mongrel                   | TREATMENT STUDY: Lethal photosensitization and GBR                                           | 5 | Mandible                        | All PMs and M1 on both sides of the mandible | 3m | Split mouth                                                                                      | Screw shape<br>(1) CpTi Sterngold Implantmed, Attleboro, MA, USA)<br>(2) TPS, Sterngold...<br>(3) Hybrid – machined in first 3 screws and then acid etched (3i                   | 3,75x10 mm                                        | Ti                      | (1)Turned<br><br>(2) TPS,<br><br>(3) Hybrid – machined in first 3 screws and then acid etched<br><br>(4) Sandblasted with ti oxide | Bone level   | 8: 4 on each side                 | 2-stage | NA         | 3m+2m                                         | Yes according to treatment                              | No – upper PMs extracted to avoid loading                                                            | otassium and sodium benzyl penicillin once/w for 2w postoperatively                         | (A) After tooth extraction                                                               | (A) until ligature placement | (A) Scrubbing with 0,12 % CHX daily and scaling and root planning 1t/m. |

|                                                                                           |      |                                                       |                                                                               |                              |                                                                                  |                                                                                             |     |                                                              |                                                                                                                        |                                                |    |                                                             |                                                         |                                   |             |    |         |                                         |                        |                                                                         |                               |             |                                               |  |
|-------------------------------------------------------------------------------------------|------|-------------------------------------------------------|-------------------------------------------------------------------------------|------------------------------|----------------------------------------------------------------------------------|---------------------------------------------------------------------------------------------|-----|--------------------------------------------------------------|------------------------------------------------------------------------------------------------------------------------|------------------------------------------------|----|-------------------------------------------------------------|---------------------------------------------------------|-----------------------------------|-------------|----|---------|-----------------------------------------|------------------------|-------------------------------------------------------------------------|-------------------------------|-------------|-----------------------------------------------|--|
| Osseotite, Implants Innovations (4) Sandblasted with ti oxide Porous, Conexao Implants... |      |                                                       |                                                                               |                              |                                                                                  |                                                                                             |     |                                                              |                                                                                                                        |                                                |    |                                                             |                                                         |                                   |             |    |         |                                         |                        |                                                                         |                               |             |                                               |  |
| 81. Schwarz et al                                                                         | 2007 | Dog, beagle                                           | Human vs dog: Defect size and configuration of natural vs ligature-induced PI | 5 dogs and 24 human patients | Mandible, both sides                                                             | PM2, PM3, PM4, M1, On both sides                                                            | 4m  | Ligatures around all implants                                | Screw-shape (ITI, tissue level)                                                                                        | 3,3 x 10 mm                                    | Ti | Sand-blasted, acid etched (SLA)                             | Tissue level                                            | 6: 3 on each side                 | 1-stage     | NA | 3m+0    | -                                       | No                     | Clindamycin e 11mg/kg during tooth extraction surgery and for 10d after | (A) after implant surgery     | (A) 3m      | (A) Brush daily                               |  |
| 82. Takasaki et al                                                                        | 2007 | Dog, Beagle                                           | TREATMENT STUDY Er:YAG vs curettage                                           | 4                            | Mandible                                                                         | PM1, PM2, PM3, PM4 on both sides                                                            | 3m  | Split mouth                                                  | Screw-form (Standard plus, ITI dental Implant System, Straumann AG, Waldenburg, Switzerland)                           | 3,3x 10 mm                                     | Ti | Sand-blasted Large grit Acid-etched (SLA)                   | Tissue level                                            | 4:2 on each side                  | 1-stage     | NA | 3m+0    | No                                      | NA (no suprastructure) | Penicillin G, 200.000 U/dayfollowing implant installation               | (A) After implant insertion   | (A) 3m      | (A) Clinical plaque control with 2% CHX 3t/w. |  |
| 83. You et al                                                                             | 2007 | Dog, Mongrel                                          | TREATMENT STUDY                                                               | 6                            | Mandible                                                                         | All PMs                                                                                     | 3m  | One of 3 different treatments per quadrant                   | Screw type (Osstem, Seoul, Kora)                                                                                       | 4,1x 10 mm                                     | Ti | AE                                                          | Tissue level                                            | 6: 3 on each side                 | 1-stage     | NA | 3m+0    | No                                      | NA-no suprastructure   | During treatment                                                        | NA                            | NA          | NA                                            |  |
| 84. Albouy et al                                                                          | 2008 | Dog, Labrador (same animals as study 6 in this table) | 4 implants/ -surfaces (A, B, C, D)                                            | 6                            | Mandible, right side                                                             | 12 (All mandibular premolars and the three anterior premolars in the maxilla on both sides) | 3m  | Interquadrant: One of each implant type in the same quadrant | Screw type A: Biomet 3i ICE Micro miniimplant B: Astra Tech MicroThreaded C: Straumann SP NN D: Nobel Biocare MKIII NP | A: 2,35x10 B: 3,5x11 C: 3,3x10 D: 3,3x10       | Ti | A: U B: TiOblast C: Sandblasted AE D: TiUnite               | A,B,D: Bonelevel C: Tissuelevel                         | 4 (all in 1 quadrant)             | 1-stage     | NA | 3m + 0  | Yes                                     | No                     | NA                                                                      | 2w after implant installation | 3m minus 2w | Daily cleaning of implants                    |  |
| 85. Martins et al                                                                         | 2008 | Dog, Beagle                                           | 2 surfaces – Implant mobility and clinical reaction to exp. PI                | 5                            | Mandible                                                                         | PM2 PM3 PM4 On both sides of the mandible                                                   | 90d | Random mesio-distal order                                    | Screw shaped Turned Brånemark and Sandblastid acid/ etched (SLA) Straumann                                             | 4x11 mm (Brånemark) 4,1x10 mm (ITI, Straumann) | Ti | Brånemark: Turned Straumann: SLA (Sandblasted, acid-etched) | Coating level/ shoulder coinciding with the bone crest. | 4: 2 on each side of the mandible | 2-stage (?) | NA | 120d+0d | YES Implants placed in randomized order | No                     | NA                                                                      | (A) after tooth extraction    | (A)210d     | (A) Brushing with 0,12% CHX 3t/w              |  |
| 86. Albouy et al                                                                          | 2009 | Dog, Labrador (same animals as study 7 in this table) | 4 implants/ -surfaces (A, B, C, D)                                            | 6                            | Mandible, right side (4 implants on the left side presented in a separate study) | 12 (All mandibular premolars and the three anterior premolars                               | 3m  | Interquadrant: One of each implant type in the same quadrant | Screw type A: Biomet 3i ICE Micro miniimplant B: Astra Tech MicroThreaded A: Straumann SP NN                           | A 2,35x10 B 3,5x11 C 3,3x10 D 3,3x10           | Ti | A: U B: TiOblast C: Sandblasted AE D: TiUnite               | A,B,D Bonelevel C Tissuelevel                           | 4 (all in 1 quadrant)             | 1-stage     | NA | 3m + 0  | Yes                                     | No                     | NA                                                                      | 2w after implant installation | 3m minus 2w | Daily cleaning of implants                    |  |

|                   |      |               |                                                                              |                                      |                      |                                                                                          |     |                                                              |                                                                                                                            |                                                                                        |    |                                                        |                                                       |                                   |                                    |                                  |        |                             |                                  |                                                                        |                                                                     |                              |                                                                                |
|-------------------|------|---------------|------------------------------------------------------------------------------|--------------------------------------|----------------------|------------------------------------------------------------------------------------------|-----|--------------------------------------------------------------|----------------------------------------------------------------------------------------------------------------------------|----------------------------------------------------------------------------------------|----|--------------------------------------------------------|-------------------------------------------------------|-----------------------------------|------------------------------------|----------------------------------|--------|-----------------------------|----------------------------------|------------------------------------------------------------------------|---------------------------------------------------------------------|------------------------------|--------------------------------------------------------------------------------|
|                   |      |               |                                                                              |                                      |                      | in the maxilla on both sides.)                                                           |     |                                                              | B: Nobel Biocare MKIII NP<br>C: Straumann SP NN<br>D: Nobel Biocare MKIII NP                                               |                                                                                        |    |                                                        |                                                       |                                   |                                    |                                  |        |                             |                                  |                                                                        |                                                                     |                              |                                                                                |
| 87. Parlar et al. | 2009 | Mongrel dogs  | Plaque control (intermediary piece of the implant)                           | 9                                    | Mandible             | 8: 4 each side (2°PM, 3°PM, 4°PM, 1°M)                                                   | 3m  | Split-mouth                                                  | Screw-type                                                                                                                 | 4.1x13.0                                                                               | Ti | SA                                                     | Tissuelevel                                           | 6                                 | 1 stage (however, with 3m healing) | NA                               | 8w + 0 | No                          | No                               | No                                                                     | (1) Pre-experiment, (2) just before ligature removal, (3) after GBR | (1) 3w, (2) only once, (3) ? | (1) scaling, polishing, (2) brushing, local debridement, CHX, (3) CHX spraying |
| 88. Albouy et al  | 2011 | Dog, Labrador | TREATMENT STUDY: 4 implants/ -surfaces (A, B, C, D)                          | 6                                    | Mandible, left side  | 12 (All mandibular premolars and the 3 anterior premolars in the maxilla on both sides.) | 3m  | Interquadrant: One of each implant type in the same quadrant | Screw type<br>A Biomet 3i ICE Micro miniplant<br>B Astra Tech MicroThread<br>C Straumann SP NN<br>D Nobel Biocare MKIII NP | A 3,25x10<br>B 3,5x11<br>C 3,3x10<br>D 3,3x10                                          | Ti | A: U<br>B: TiOblast<br>C: Sandblasted AE<br>D: TiUnite | A,B,D Bonelevel<br>C Tissuelevel                      | 4 (all in 1 quadrant)             | 1-stage                            | NA                               | 3m + 0 | Yes                         | No                               | NA                                                                     | 2w after implant installation                                       | 3m minus 2w                  | Daily cleaning of implants                                                     |
| 89. Levin et al   | 2011 | Dog, Mongrel  | Reiimplantation of failed implants and new implants in failed sites          | 2                                    | Mandible             | All PMs on both sides of the mandible                                                    | 12w |                                                              | Screw shaped SEVEN, MIS implants                                                                                           | NA                                                                                     | Ti | ?                                                      | Bone level                                            | 4: 2 on each side of the mandible | 1-stage                            | NA (placed at PM1 and PM3 sites) | 0+45d  | No                          | NA (No suprastructure)           | NA                                                                     | NA                                                                  | NA                           | NA                                                                             |
| 90. Schwarz et al | 2011 | Dog, beagle   | TREATMENT STUDY: Radiographical and histological bone level after PI-surgery | 6                                    | Mandible, both sides | All PM1, PM2, PM3, PM4, M1, M2<br>In maxilla and mandible                                | 10w | Split mouth according to treatment                           | Screw- shaped                                                                                                              | 3,8 x 11 mm (Camlog Screw line Implant, PromotePlus, Camlog Biotechnologies AG, Basel) | Ti | NA                                                     | Bone level (Implabnt shoulder 0,4 mm over the crest). | 8: 4 on each side of the mandible | 1-stage                            | 10 mm apart                      | 6w+0   | Yes, according to treatment | No – upper teeth also extracted. | Clindamycine 11mg/kg during tooth extraction surgery and for 10d after | (a) 7d after implant surgery (B) after ligature removal             | (A) 6w (B) 4w                | (A) brush 2t/ w. (B) Brush and dentifrice                                      |
| 91. Albouy et al  | 2012 | Dog, Labrador | 2 surfaces                                                                   | 5 according to abstract, 6 according | Mandible, one side   | 6 (All mandibular premolars                                                              | 3m  | Interquadrant: One of each in one side of the mandible       | Screw type (Brånemark MKIII narrow platform)                                                                               | 3,3x10                                                                                 | Ti | Turned, TiUnite                                        | Bone level                                            | 2                                 | 1-stage                            | NA                               | 3m + 0 | Yes                         | No                               | NA                                                                     | 2w after implant installation                                       | 3m minus 2w                  | Daily cleaning of implants                                                     |



| Study                 | Year | Species                                                | Intervention                                                                                                                  | Material                                                    | Site                                                    | Implant                                                                              | Time                                                 | Assessment                                                                                                    | Implant                                                                    | Material | Assessment | Implant                                      | Time                                                                                       | Assessment                                                   | Implant | Time  | Assessment | Implant                                | Time                        | Assessment | Implant                                              | Time          | Assessment                                     |
|-----------------------|------|--------------------------------------------------------|-------------------------------------------------------------------------------------------------------------------------------|-------------------------------------------------------------|---------------------------------------------------------|--------------------------------------------------------------------------------------|------------------------------------------------------|---------------------------------------------------------------------------------------------------------------|----------------------------------------------------------------------------|----------|------------|----------------------------------------------|--------------------------------------------------------------------------------------------|--------------------------------------------------------------|---------|-------|------------|----------------------------------------|-----------------------------|------------|------------------------------------------------------|---------------|------------------------------------------------|
| 92. Golubovic et al   | 2012 | Dog, Beagle                                            | CBCT vs histometric measurement of peri-implant bone loss                                                                     | 3 (6 in the original material)                              | Mandible, both sides                                    | 20:10 in each jaw. all PM1, PM2, PM3, PM4, M1, M2                                    | 10w                                                  | Evaluation of bone loss around 9 compromised sites in a material published in study 104 (Schwartz et al 2011) | Screw-shaped (Camlog Screw-line implant, Promote plus)                     | 3,8x11   | Ti         | Promote plus (abrasive blasted, acid etched) | Bone level (implant shoulder exceeded the buccal aspect of the alveolar crest with 0,4 mm) | 8; 4 on each side (However, 9 implants in the current study) | 1-stage | 10 mm | 0+6w       | Yes. According to treatment modality   | No                          | ?          | (A) 1w after implantation (B) After ligature removal | (A) 5w (B) 4w | (A)Brush twice a week (B) Brush and dentifrice |
| 93. López-Piriz et al | 2012 | Dog, Beagle                                            | Soda-lime-glass/ Ag abutment coating vs control                                                                               | 5                                                           | Mandible                                                | PM1 PM2 PM3 PM4 M1 On both sides of the mandible                                     | 3m                                                   | Interquadrant: Test implants at all central and distal sites.                                                 | Screw shaped Phibo dental solutions                                        | NA       | Ti         | ?                                            | Bone level                                                                                 | 6: 3 on each side of the mandible                            | 2-stage | NA    | 2m+        | No                                     | NA (no suprastructure)      | No         | (A) After abutment connection                        | (A)4w         | (A) Toothbrush and dentifrice 5d/w             |
| 94. Becker et al      | 2013 | Mice                                                   | Ligature/ no ligature                                                                                                         | 8                                                           | Hard palate                                             | None                                                                                 | -                                                    | Animals divided in 2 groups: A: Ligature group B: No ligature                                                 | Membrane tack (Friadent)                                                   | NA       | Ti         | NA                                           | Tissue level                                                                               | 1                                                            | 1-stage | -     | 0+0        | No                                     | No                          | NA         | None                                                 | -             | -                                              |
| 95. Carcuac et al     | 2013 | Dog, Labrador (same animals as study 13 in this table) | Teeth vs implants/ 2 implant surfaces                                                                                         | 6 according to material and method, 5 according to abstract | Mandible, implants on the right side, teeth on the left | Right mandibular premolars and first molar. Three right anterior maxillary premolars | 3m                                                   | Split mouth (IMPLANT S VS TEETH) Interquadrant (2 SURFACES)                                                   | Screw shaped Nobel Biocare MKIII, NP                                       | 3,3x10   | Ti         | A: Turned B: TiUnite                         | Bone level                                                                                 | 4 (On the right side of the mandible)                        | 1-stage | NA    | 3+0        | Yes – Pairwise placement               | No                          | NA         | 2w after implant installation                        | 3m minus 2w   | Tooth and abutment cleaning 3 times a week     |
| 96. Fan et al         | 2013 | Dog, Beagle                                            | TREATMENT Different immunisation protocols: (A) plasmid vecor-rgpA (B) heat-killed P. gingivalis (C) Plasmid-vector (control) | 15                                                          | Mandible, both sides                                    | 4: 2 each side (2ndPM, 3rdPM)                                                        | 0 (simultaneous extraction and implant installation) | 3 animal groups (A), (B), (C): 5 animals in each                                                              | Screw shaped, Beijing Leidon Biomaterial limited (similar to Straumann SP) | 3,5x12   | Ti         | NA                                           | Tissue level                                                                               | 4: 2 on each side                                            | 1-stage | NA    | 4m and 2w. | Yes, dogs randomly divided into groups | NA (No suprastructure used) | NA         | 2 weeks after implantation                           | 4m and 2w     | Brush daily                                    |

|                         |      |                                                        |                                                                                  |                                                              |                                                         |                                                                                      |                            |                                                                                       |                                                                          |                                                       |    |                                                                                                          |              |                                       |                                    |    |        |                                            |                        |                                                      |                                |             |                                            |
|-------------------------|------|--------------------------------------------------------|----------------------------------------------------------------------------------|--------------------------------------------------------------|---------------------------------------------------------|--------------------------------------------------------------------------------------|----------------------------|---------------------------------------------------------------------------------------|--------------------------------------------------------------------------|-------------------------------------------------------|----|----------------------------------------------------------------------------------------------------------|--------------|---------------------------------------|------------------------------------|----|--------|--------------------------------------------|------------------------|------------------------------------------------------|--------------------------------|-------------|--------------------------------------------|
| 97. Madi et al          | 2013 | Dog, Beagle                                            | Experimental PI at different implant surfaces                                    | 6                                                            | Mandible                                                | PM1<br>PM2<br>PM3<br>PM4<br>On both sides of the mandible                            | 3m                         | Interquadrant, anterior-posterior randomized fashion                                  | 3 screw shaped and 1 cylindrical - the (4) HA plasma-sprayed+pressurized | 3,3x10 mm (screw shaped) and 3,25x10 mm (cylindrical) | Ti | (1) Machined<br>(2) Sandblasted, acid-etched<br>(3) Sputter HA-coat<br>(4) HA plasma-sprayed+pressurized | Bone level   | 8: 4 on each side of the mandible     | 1-stage                            | NA | 0+3m   | YES, implants placed in a randomized order | No                     | Metronidazole 11mg/kg postoperatively for three days | (A) 2w after implant placement | (A) 3m      | (A) 2% CHX rinse 3t/w+scaling 1t/m         |
| 98. Charalampakis et al | 2014 | Dog, Labrador (same animals as study 12 in this table) | Teeth vs implants/ 2 implant surfaces                                            | 6 according to material and method, 5 according to abstract. | Mandible, implants on the right side, teeth on the left | Right mandibular premolars and first molar. Three right anterior maxillary premolars | 3m                         | Split mouth (CHX vs SALINE) Inter-quadrant (4 surfaces)                               | Screw shaped Nobel Biocare MKIII, NP                                     | 3,3x10                                                | Ti | A: Turned<br>B: TiUnite                                                                                  | Bone level   | 4 (On the right side of the mandible) | 1-stage                            | NA | 3+0    | Yes- Pairwise placement                    | No                     | NA                                                   | 2w after implant installation  | 3m minus 2w | Tooth and abutment cleaning 3 times a week |
| 99. Guo et al           | 2014 | Dog, Beagle                                            | TREATMENT – DNA vaccines for preventing peri-implantitis and retarding bone loss | 16                                                           | Mandible, both sides                                    | 4: 2 on each side (PM2, PM3)                                                         | 0 – immediate implantation | Animals divided in 4 groups: (A) pVAX1-kpg, (B) pVAX1-rgpA, (C) pVAX1-rgpB, (D) pVAX1 | Screw-shape                                                              | 3,5x10                                                | Ti | NA                                                                                                       | Tissue level | 4: 2 on each side                     | 1-stage                            | NA | 3,5m+0 | NA                                         | NA (no suprastructure) | NA                                                   | NA                             | NA          | NA                                         |
| 100. Madi et            | 2014 | Dog, Beagle                                            | Experimental PI at different implant surfaces                                    | 4                                                            | Mandible                                                | PM1<br>PM2<br>PM3<br>PM4<br>On both sides of the mandible                            | 3m                         | Interquadrant, anterior-posterior randomized fashion                                  | 3 screw shaped and 1 cylindrical - the (4) HA plasma-sprayed+pressurized | 3,3x10 mm (screw shaped) and 3,25x10 mm (cylindrical) | Ti | (1) Machined<br>(2) Sandblasted, acid-etched<br>(3) Sputter HA-coat<br>(4) HA plasma-sprayed+pressurized | Bone level   | 8: 4 on each side of the mandible     | 1-stage                            | NA | 0+3m   | YES, implants placed in a randomized order | No                     | Metronidazole 11mg/kg postoperatively for three days | (A) 2w after implant placement | (A) 3m      | (A) 2% CHX rinse 3t/w+scaling 1t/m         |
| 101. Martinez et al     | 2014 | Dog, Beagle                                            | Soda lime glass coated abutments with silver Nano-particles                      | 5                                                            | Mandible                                                | PM1<br>PM2<br>PM3<br>PM4<br>M1<br>On both sides of the mandible                      | 12w                        | Inter-quadrant: Mesial implant as control, 2 distal ones as test                      | Screw shaped (Phibo dental solutions, Barcelona, Spain)                  | 3,75x11,5                                             | Ti | NA                                                                                                       | Bone level   | 6: 3 on each side of the mandible     | 2-stage                            | NA | 2m+4w  | No                                         | No                     | No                                                   | (A) After abutment connection  | (A) 4w      | (A) brush and dentifrice 5d/w              |
| 102. Pârvu et al.       | 2014 | Dogs                                                   | Placebo and Ibuprofen                                                            | 6                                                            | Maxilla                                                 | 1 (2°PM)                                                                             | 0                          | -                                                                                     | Screw-type (OT medical GmbH, Bremen, Germany)                            | 2.0x8.0                                               | Ti | NA                                                                                                       | Tissuelevel  | 1                                     | 1 stage (however, with 5w healing) | -  | 5w + 0 | Yes                                        | -                      | -                                                    | -                              | -           | -                                          |

|                          |      |                  |                                                                                                        |   |                         |                                                                                                                           |                                                                                        |                                                                                                                                       |                                                                                                                                                           |                                                                                                                   |                                                       |                                                                                                                    |                                                                                                                                              |                                          |                                                                                                 |       |        |                                                                                                  |                                                                                                  |                                                                           |                                                                                                                                                  |                                                        |                                                                                                                                                                                                                                                                                                                 |
|--------------------------|------|------------------|--------------------------------------------------------------------------------------------------------|---|-------------------------|---------------------------------------------------------------------------------------------------------------------------|----------------------------------------------------------------------------------------|---------------------------------------------------------------------------------------------------------------------------------------|-----------------------------------------------------------------------------------------------------------------------------------------------------------|-------------------------------------------------------------------------------------------------------------------|-------------------------------------------------------|--------------------------------------------------------------------------------------------------------------------|----------------------------------------------------------------------------------------------------------------------------------------------|------------------------------------------|-------------------------------------------------------------------------------------------------|-------|--------|--------------------------------------------------------------------------------------------------|--------------------------------------------------------------------------------------------------|---------------------------------------------------------------------------|--------------------------------------------------------------------------------------------------------------------------------------------------|--------------------------------------------------------|-----------------------------------------------------------------------------------------------------------------------------------------------------------------------------------------------------------------------------------------------------------------------------------------------------------------|
| 103.<br>Battula<br>et al | 2015 | Dog,<br>Hound    | 2 implants (A,<br>B) with/<br>without<br>ligature                                                      | 8 | Mandible                | 8<br>(Premolar<br>s 3+4 and<br>molars<br>1+2)                                                                             | 0<br>(immediate<br>post<br>extraktion<br>placement in<br>each<br>respective<br>socket) | Animals<br>divided in 2<br>groups:<br>Experiment<br>al peri-<br>implantitis<br>vs. Control.<br>4 of each<br>implant in<br>all animals | A: Screw<br>shaped –<br>Tapered Screw-<br>Vent MTX,<br>Zimmer Dental<br>B: Screw<br>shaped<br>cervically and<br>apically, central<br>porous<br>structure. | 4,1x13<br>mm                                                                                                      | A: Ti<br>B: Ti with<br>central<br>Tantalum<br>portion | -                                                                                                                  | Bone level.                                                                                                                                  | 8                                        | 2-stage<br>(Allograft<br>bone material<br>and collagen<br>membrane<br>used for all<br>implants) | NA    | 3m + 0 | Yes                                                                                              | No (Not<br>specifically<br>stated, no<br>extraktion<br>of<br>antagonizin<br>g teeth<br>reported) | NA                                                                        | None (ligatures<br>were placed<br>during the<br>abutment surgery<br>in the<br>experimental<br>group).                                            | -                                                      | -                                                                                                                                                                                                                                                                                                               |
| 104.<br>Carcuac<br>et al | 2015 | Dog,<br>labrador | TREATMEN<br>T STUDY<br>4 implants/<br>surfaces. CHX<br>vs Saline                                       | 6 | Mandible,<br>both sides | All<br>mandibula<br>r<br>premolars.<br>1 <sup>st</sup> , 2 <sup>nd</sup> and<br>3 <sup>rd</sup><br>maxillary<br>premolars | 3m                                                                                     | Split mouth<br>(CHX vs<br>SALINE)<br>Inter-<br>quadrant (4<br>surfaces)                                                               | Screw shaped.<br>A, B, and C:<br>Astra Tech<br>Implant system.<br>D: Nobel<br>Biocare.                                                                    | A,B,C:<br>3,5x11<br>D:<br>3,3x11,5                                                                                | Ti                                                    | A: TiOblast<br>B: Osseospeed<br>C: AT-I<br>D: TiUnite                                                              | Bone level                                                                                                                                   | 8 (4 on each<br>side of the<br>mandible) | 1-stage                                                                                         | NA    | 3+0    | Yes – identical<br>placementsequence on<br>both sides but<br>randomized sequence<br>between dogs | No                                                                                               | NA                                                                        | 2w after implant<br>installation                                                                                                                 | 3m minus 2w                                            | Plaque<br>control 3<br>times a<br>week                                                                                                                                                                                                                                                                          |
| 105.<br>Fickl et<br>al   | 2015 | Dog,<br>Beagle   | Experimental<br>peri-<br>implantitis<br>around 3<br>different<br>implants                              | 5 | Mandible,<br>both sides | 8: 4 each<br>side<br>(1stM,<br>2ndPM,<br>3rdPM,<br>4thPM)                                                                 | 8w                                                                                     | Inter-<br>quadrant                                                                                                                    | Screw-type: (B)<br>BIOMET 3i T3<br>(N) Nobel<br>Replace<br>Tapered (S)<br>Straumann bone<br>level                                                         | (B)<br>3,25x8,5<br>(N) 3,5x8)<br>(S) 3,3x8)                                                                       | Ti                                                    | (B) OsseoTite (N)<br>TiUnite (S)<br>SLActive (from<br>manufacturers info,<br>not specified in<br>article)          | Bone level,<br>although<br>placed in a 2<br>mm epi-<br>crestal<br>position                                                                   | 10: 5 on<br>each side                    | 1-stage                                                                                         | NA    | 0+2m   | Yes, implants<br>randomly inserted                                                               | NA (No<br>suprastruct<br>ure used)                                                               | For 1w after<br>surgery:<br>Amoxicillin<br>500mg x2 IV                    | (1) After<br>implantation<br>(2) After<br>ligature removal                                                                                       | (1) 2m<br>(2) 8w                                       | (1) 0,12%<br>CHX rinse<br>(interval?)<br>(2) Daily<br>brush with<br>pumice+0,<br>12% CHX<br>followed<br>by 0,12%<br>CHX<br>spray<br>(A)<br>Scaling to<br>remove<br>supragingi<br>val<br>calculus<br>(B) CHX<br>rinse<br>every<br>second<br>day 0,12%<br>(C) Brush<br>with 0,2%<br>chx gel<br>every<br>other day |
| 106.<br>Huang<br>et al   | 2015 | Dog,<br>beagle   | Crestal vs<br>subcrestal<br>position.<br>Screwed in vs<br>tapped<br>implant-<br>abutment-<br>interface | 6 | Mandible                | 8: M1,<br>PM4,<br>PM3,<br>PM2 on<br>one side<br>of the<br>mandible                                                        | 8w                                                                                     | Ligatures<br>around all<br>implants                                                                                                   | Screw-shaped                                                                                                                                              | (A) Astra<br>teck<br>OsseoSpe<br>ed 3,5x8<br>mm<br>(B) Bicon<br>Dental<br>Implants,<br>Integra-<br>CP 3,5x8<br>mm | TI                                                    | (A) Fluoride-<br>modified TiO2 grit<br>blasted surfaces<br>(OsseoSpeed)<br>(B) Plasma-sprayed<br>calcium-phosphate | (A) 1 crestal<br>and 1<br>subcrestal (1,5<br>mm) in each<br>animal<br><br>(B) 1 crestal<br>and 1<br>subcrestal (1,5<br>mm) in each<br>animal | 4 on one<br>side of each<br>mandible     | 2-stage                                                                                         | 10 mm | 12w+4w | NA                                                                                               | No                                                                                               | Penicillin G<br>40.000IU/kg<br>intramuscula<br>rly once/ day<br>in 1 week | (A) 1 week<br>before implant<br>surgery<br>(B) After<br>abutment surgery<br>(C) from 10d<br>post abutment<br>surgery to<br>ligature<br>placement | (A) at one<br>occasion<br>(B) 10d<br>(C) Approx<br>18d | (1) 0,12%<br>CHX rinse<br>every<br>second<br>day 0,12%<br>(C) Brush<br>with 0,2%<br>chx gel<br>every<br>other day                                                                                                                                                                                               |
| 107.<br>Ikumi et<br>al   | 2015 | Dog,<br>Beagle   | Overload –<br>various<br>magnitudes of<br>static<br>compressive<br>stress (0-180<br>MPa)               | 2 | Tibia                   | -                                                                                                                         | 2m                                                                                     | Compressiv<br>e stress in<br>different<br>magnitudes                                                                                  | Screw shaped                                                                                                                                              | 4,0x?<br>custom<br>made<br>implant                                                                                | Ti                                                    | NA                                                                                                                 | Bone Level                                                                                                                                   | 8: 4 in each<br>tibia                    | 2-stage                                                                                         | NA    | 2m+2m  | NA                                                                                               | Yes                                                                                              | Single dose<br>ampicillin<br>50mg/kg<br>after implant<br>surgery          | -                                                                                                                                                | -                                                      | -                                                                                                                                                                                                                                                                                                               |

|                               |       |                      |                                                                                             |    |          |                                               |     |                                                                                              |                                                                  |            |    |              |                               |                                   |                     |    |          |                     |                        |                                                                                                                                                                                 |                                                               |             |                                                                                                   |
|-------------------------------|-------|----------------------|---------------------------------------------------------------------------------------------|----|----------|-----------------------------------------------|-----|----------------------------------------------------------------------------------------------|------------------------------------------------------------------|------------|----|--------------|-------------------------------|-----------------------------------|---------------------|----|----------|---------------------|------------------------|---------------------------------------------------------------------------------------------------------------------------------------------------------------------------------|---------------------------------------------------------------|-------------|---------------------------------------------------------------------------------------------------|
| 108.<br>López-<br>Piriz et al | 2015  | Dog,<br>Beagle       | 3 different antimicrobial glassy coated abutments effect on bacteria, biofilm and bone loss | 5  | Mandible | All Ms and PMs on both sides of the mandible  | 3m  | Inter-quadrant:<br>(1)control<br>(2) ZnO-glassy<br>(3) G3 glassy coating<br>(4) n-Ag coating | Screw shaped SEVEN, MIS                                          | NA         | Ti | ?            | Bone level                    | 8; 4 on each side of the mandible | 2-stage             | NA | 8w+      | No                  | NA (No suprastructure) | NA                                                                                                                                                                              | (A) After abutment connection                                 | (A)4w       | (A) Toothbrush and dentifrice 5d/w                                                                |
| 109.<br>Namgoong et al.       | 2015  | Beagle dogs          | 3 surfaces: U, SA, SA/HA                                                                    | 5  | Mandible | 10: 5 each side (1°PM, 2°PM, 3°PM, 4°PM, 1°M) | 12w | Split-mouth                                                                                  | Screw-type (Osstem, Busan, Korea)                                | 3.0x8.5    | Ti | U, SA, SA/HA | Bonelevel (1 mm subcrestally) | 3                                 | 2 stage (submerged) | NA | 12w + 2w | Yes                 | No                     | NP                                                                                                                                                                              | During implant healing: toothbrush 2x/w for 12w. Post-op.: NP | 12w pre-op. | toothbrush                                                                                        |
| 110.<br>Park et al.           | 2015a | Beagle dogs          | Different plaque control methods                                                            | 6  | Mandible | 10: 5 each side (1°PM, 2°PM, 3°PM, 4°PM, 1°M) | 3m  | Split-mouth                                                                                  | Screw-type (GS II RBM fixture; Osstem, Seoul, Republic of Korea) | 3.5x8.5    | Ti | NA           | Tissuelevel                   | 4                                 | 2 stage             | NA | 3m + 0   | No                  | No                     | After GBR (2d)                                                                                                                                                                  | 1m after ligature removal                                     | Only once   | 3 groups: (G1) manual irrigation-syringe; (G2) dental water jet; (G3) dental water jet + flossing |
| 111.<br>Park et al.           | 2015b | Beagle dogs          | Different GBR methods                                                                       | 6  | Mandible | 10: 5 each side (1°PM, 2°PM, 3°PM, 4°PM, 1°M) | 3m  | Split-mouth                                                                                  | Screw-type (TSIII SA fixture; Osstem, Seoul, Republic of Korea)  | 3.5x8.5    | Ti | SB/AE        | Tissuelevel                   | 4                                 | 2 stage             | NA | 3m + 0   | No                  | No                     | No                                                                                                                                                                              | 1m after ligature removal                                     | Only once   | Dental water jet + flossing                                                                       |
| 112.<br>Pirih et al           | 2015  | Mice, C57BL/6 J male | Ligature (10 mice) vs control (8 mice)                                                      | 18 | Maxilla  | 3: M1, M2, M3 on the left side                | 8w  | Comparison between animals                                                                   | Screw type (G. Hartzell and Son, Concord, CA, USA)               | 0,5x1      | Ti | U            | Tissuelevel                   | 1                                 | 1 stage             | -  | 4w+0     | Yes, toss of a coin | No                     | For 4w aft tooth extractions/ implant surgery respectively. Diluted in drinking water Sulfamethoxazole and trimethoprim oral suspension 850 micro g/ 170 micro g/mL in drinking | No                                                            | No          | No                                                                                                |
| 113.<br>Pirih et al           | 2015  | Mouse, C57BL/6 J     | Local P. gingivalis lipopolysaccharide injection vs No injection and vehicle injection      |    | Maxilla  | M1, M2, M3 on the left side of the maxilla    | 8w  |                                                                                              | Screw type, custom made.                                         | 0,5 x 1 mm | Ti | U            | Bonelevel                     | 1                                 | 1 stage             | -  | 4w+0     | No                  | -                      |                                                                                                                                                                                 | -                                                             | -           | -                                                                                                 |

|                       |      |                        |                                                                                     |                                                                                            |          |                                                           |                                           |                                      |                                               |                       |           |                                                                                                                                            |                          |                                   |         |    |        |                                            |                        |                                                      | water for 4w after extraction and 4w after implant surgery |                                    |                                                        |
|-----------------------|------|------------------------|-------------------------------------------------------------------------------------|--------------------------------------------------------------------------------------------|----------|-----------------------------------------------------------|-------------------------------------------|--------------------------------------|-----------------------------------------------|-----------------------|-----------|--------------------------------------------------------------------------------------------------------------------------------------------|--------------------------|-----------------------------------|---------|----|--------|--------------------------------------------|------------------------|------------------------------------------------------|------------------------------------------------------------|------------------------------------|--------------------------------------------------------|
| 114. Shi et al        | 2015 | Dog, Beagle            | TREATMENT STUDY non-equilibrium plasma vs conventional treatment                    | 6                                                                                          | Mandible | PM4 on both sides of the mandible                         |                                           | Split mouth (treatment)              | Screw-shape (Anthofit, OIIM, 35100, Anthogyr) | 3,5 x 10              | Ti        | A BCP sandblasted surface consisting of a mixture of hydroxyapatite and beta-tricalcium phosphate with Ra ranging from 1,5 to 2,0 micro-m. | Bone level               | 2: 1 on each side                 | 1-stage | -  | 0+3m   | Yes, according to treatment                | No                     | NA                                                   | (a) From start of study                                    | (A) NA                             | (A) Toothbrush and sahline every 3 <sup>rd</sup> day   |
| 115. Takamori et al   | 2015 | Rat, Lewis             | Onset of peri-implantitis vs periodontitis                                          | 25                                                                                         | Maxilla  | Maxillary right M1                                        | 0 – implant placed directly               | Comparison between animals           | Screw-form (Sky Blue, Fukuoka, Japan)         | 2x 4,5 mm             | Ti-6AL-4V | NA                                                                                                                                         | Tissue level             | 1: 1 on the right side            | 1-stage | -  | 0+     | No                                         | NA                     | No                                                   | None                                                       | None                               | None                                                   |
| 116. Htet et al       | 2016 | Dog, Beagle            | TREATMENT Er:YAG VS Photodynamic therapy and titanium bur with/ without citric acid | 5                                                                                          | Mandible | All mandibular PMs                                        | 6w                                        | Ligatures around all implants        | Screw shaped                                  | 3,3x10 mm Brånemark   | Ti        | Ti-unite                                                                                                                                   | Bone level               | 6: 3 in each side of the mandible | 1-stage | NA | 8w     | Yes – according to treatment               | NA (no suprastructure) | NA                                                   | (A) After implant surgery<br>(B) After ligature removal    | (A) 8w<br>(B) 3w                   | (A)+(B) CHX 0,12% 3 times a week. Scaling once a month |
| 117. Ishii et al      | 2016 | Dog, Beagle            | UV-light irradiated SLA-surface vs conventional SLA-surface                         | 3                                                                                          | Mandible | PM2, PM3, PM4 on both sides                               | 0m immediate post extraction implantation | Split mouth                          | Screw shaped                                  | 3,3x8 mm Straumann SP | Ti        | SLA (sandblasted + AE)                                                                                                                     | Bone level               | 4: 2 on each side of the mandible | 1-stage | NA | 90d+0d | No                                         | No                     | -                                                    | (A) After implant surgery                                  | (A) 90d                            | (A) 0,12% CHX                                          |
| 118. Machtei et al    | 2016 | Dog, American foxhound | TREATMENT STUDY                                                                     | 5                                                                                          | Mandible | All PMs on both sides of the mandible                     | 12w                                       | Ligatures around all implants        | Screw shaped Seven, MIS                       | 3,75x10 mm            |           | Sand blasted, acid etched                                                                                                                  | Bone level               | 6: 3 on each side of the mandible | 2-stage | NA | 2m+0   | No                                         | No                     | No                                                   | (A) after implant installation                             | (A) 2m – until abutment connection | (A) 0,2% CHX rinse daily                               |
| 119. Madi et al       | 2016 | Dog, beagle            | Experimental PI at different implant surfaces                                       | 4 (3 according to number, but 4 according to the amount of implants 8 per animal total 32) | Mandible | PM1<br>PM2<br>PM3<br>PM4<br>On both sides of the mandible | 3m                                        | Inter-quadrant, randomized placement | Screw shaped                                  | 3,3x13 mm             | Ti        | (1) Machined<br>(2) Sandblasted, acid-etched<br>(3) Sputter HA-coat<br>(4) HA plasma-sprayed+pressurized                                   | Bone level               | 8: 4 on each side of the mandible | 1-stage | NA | 0+3m   | YES, implants placed in a randomized order | No                     | Metronidazole 11mg/kg postoperatively for three days | (A) 2w after implant placement                             | (A) 3m                             | (A) 2% CHX rinse 3t/ w                                 |
| 120. Nguyen Vo et al. | 2016 | Mice                   | Different follow-up times                                                           | 60                                                                                         | Maxilla  | 1 (1°M right side)                                        | 8w                                        | One quadrant                         | Screw-type                                    | 0.8x1.5               | Ti        | U                                                                                                                                          | Tissuelevel (bonelevel?) | 1                                 | 1 stage | -  | 4w + 0 | No                                         | No                     | NP                                                   | -                                                          | -                                  | -                                                      |
| 121. Xu et al         | 2016 | Dog, Beagle            | TREATMENT STUDY – bone fill with addition of                                        | 6                                                                                          | Mandible | PM1, PM2, PM3, PM4                                        | 3m                                        | Interquadrant and split mouth        | Screw type                                    | 3,8 x 10 mm           | Ti        | NA                                                                                                                                         | Bone level               | 4: 2 on each side                 | 2-stage | NA | 2m+1m  | No                                         | NA- no suprastructure  | During treatment                                     | NA                                                         | NA                                 | NA                                                     |

|                           |      |             |                                                                                                                                                 |                      |                  |                                                                           |                        |                               |                                                                 |          |                    |                                                                                                                      |              |                                    |                                  |                                                                                             |                               |                                                          |                           |                                                         |                                                                 |                   |                                                              |
|---------------------------|------|-------------|-------------------------------------------------------------------------------------------------------------------------------------------------|----------------------|------------------|---------------------------------------------------------------------------|------------------------|-------------------------------|-----------------------------------------------------------------|----------|--------------------|----------------------------------------------------------------------------------------------------------------------|--------------|------------------------------------|----------------------------------|---------------------------------------------------------------------------------------------|-------------------------------|----------------------------------------------------------|---------------------------|---------------------------------------------------------|-----------------------------------------------------------------|-------------------|--------------------------------------------------------------|
| 122. Godoy-Gallardo et al | 2016 | Dog, Beagle | stem cells and BMP-2 in 4 different groups<br><br>Implants with 3 surfaces: Ti, Ti_Ag Ti-TSP                                                    | 5                    | Mandible         | All PMs on both sides of the mandible                                     | 3m                     | Inter-quadrant                | Screw-type (Soadco S.A., Escaldes-Engordany, Andorra)           | 3,5x8 mm | Ti                 | Ti-group: Sandblasted and acid etched<br>Ti-Ag: same + silverelectrodeposition<br>Ti-Tsp: same + TESPA sinlanisation | Tissue level | 6: 3 on each side                  | 1-stage                          | Min 3 mm between implants                                                                   | 2m+0                          | Yes, random implant placement                            | NA-no suprastructure      | Amoxicillin post op.                                    | (A) After implant insertion.<br>(B) 10d after implant insertion | (A) 10d<br>(B) 2m | (A) cleanin with CHX on gauze.<br>(B) Brusch with CHX 3t/ w. |
| 123. Park et al.          | 2017 | Beagle dogs | Immediate vs. delayed implantation                                                                                                              | 4                    | Mandible         | 6: 3 each side (3°PM, 4°PM, 1°M)<br>All PMs on both sides of the mandible | 0 (3°PM) and 3m (4°PM) | Split-mouth                   | Screw-type (TSIII SA fixture; Osstem, Seoul, Republic of Korea) | 3.5x8.5  | Ti                 | SB/AE                                                                                                                | Tissuelevel  | 4                                  | 1 stage (3°PM)<br>2 stage (4°PM) | NA                                                                                          | 0 + 0 (3°PM)<br>3m + 0 (4°PM) | No                                                       | No                        | After GBR (3d)                                          | 2w after ligature removal                                       | Only once         | Dental water jet + flossing                                  |
| 124. Lin et al            | 2017 | Dog, Beagle | Stainless steel ligature investigated                                                                                                           | 6                    | Mandible         | All PMs on both sides of the mandible                                     | 4w                     | Ligatures around all implants | Screw-type (Straumann tissue levele)                            | 3,3x8 mm | Ti                 | Sand blasted and acid etched (SLA)                                                                                   | Tissue level | 6: 3 on each side, tot 36          | 1-stage                          | NA                                                                                          | 12w+0                         | No                                                       | NA-no suprastructure used | 30 min before all surgical treatment                    | (A) after abutment connection                                   | (A) 12w           | (A) brusch 2t/w                                              |
| 125. Koutouzis et al      | 2017 | Rat, Wistar | Polymicrobial inocula by gingival lavage vs sham<br>TREATMENT STUDY<br>Influence of abutment material on tissue regeneration after PI treatment | 12 (5 were analyzed) | Maxilla          | M1, on both sides                                                         | 1m                     | Comparison between animals    | Screw-type custom made                                          | 1,5x2    | Ti                 | Turned                                                                                                               | Bone level   | 2: one on each side of the maxilla | 2-stage                          | -                                                                                           | 2m+1w                         | No                                                       | No                        | Yes, before for 4 consecutive days prior to inoculation | (A) Prior to inoculation                                        | (A) 4d            | (A) CHX swabbing                                             |
| 126. Moest et al          | 2017 | Dog, Beagle | Influence of abutment material on tissue regeneration after PI treatment                                                                        | 8                    | Maxilla+Mandible | All PM2, PM3, PM4                                                         | 8w                     | Inter-quadrant                | Screw-type (Straumann Bone Level Roxolid)                       | 3,3x10   | Ti-alloy (Roxolid) | SLActive                                                                                                             | Bone level   | 51 in total in 8 animals           | 1-stage                          | Min. 10 mm center to center                                                                 | 2m+0                          | Yes, according to abutment type after surgical treatment | No                        | No                                                      | (A) After implant insertion                                     | (A) 2m            | (A) Brushing of teeth and implants                           |
| 127. Ramos et al          | 2017 | Dog, Beagle | TREATMENT STUDY                                                                                                                                 | 8                    | Mandible         | PM1, PM2, PM3, PM4, M1 on both sides of the mandible                      | 8w                     | Inter-quadrant                | Screw-ty (Straumann Bone Level)                                 | 3,3x10   | Ti                 | SLA                                                                                                                  | Bone level   | 8: 4 on each side                  | 1-stage                          | NA                                                                                          | 2m+0                          | Yes, according to treatment                              | No                        | Yes, for 3d after implant insertion                     | (A) 4w after extraction<br>(B) After implant insertion          | (A) 4w<br>(B) 8w  | (A) Dental prophylaxis<br>(B) Dental prophylaxis every 4w    |
| 128. Rodriguez et al      | 2017 | Mini-pig    | Influence of microtextured implant surfaces on PI-induction (5 animals) on PI-treatment (3 animals)                                             | 6                    | Mandible         | PM2, PM3, PM4                                                             | 12w                    | Split-mouth                   | Screw-type (BioHorizons, tapered internal system)               | 3,4x9 mm | Ti                 | (RBT) Resorbable blast textured And (LM) Laser-microtextured                                                         | Bone level   | 6: 3 on each side                  | 1-stage                          | PI group (3 animals)<br>3,451 ± 1,03 mm<br>Treatment group (3 animals):<br>3,385 ± 1,445 mm | 12w+0                         | Yes, according to implant type                           | No                        | No                                                      | NA                                                              | NA                | NA                                                           |

|                    |      |             |                                                                                           |    |          |                                                 |    |                                                                                                                                                                                          |                                                                                             |               |    |                                                                     |                                         |                                                      |         |    |        |                                           |    |                                                                                                                          |                                      |                                                                                                                                                  |    |
|--------------------|------|-------------|-------------------------------------------------------------------------------------------|----|----------|-------------------------------------------------|----|------------------------------------------------------------------------------------------------------------------------------------------------------------------------------------------|---------------------------------------------------------------------------------------------|---------------|----|---------------------------------------------------------------------|-----------------------------------------|------------------------------------------------------|---------|----|--------|-------------------------------------------|----|--------------------------------------------------------------------------------------------------------------------------|--------------------------------------|--------------------------------------------------------------------------------------------------------------------------------------------------|----|
| 129.<br>Wong et al | 2017 | Mouse       | Spontaneous healing potential after ligature removal at implants and teeth                | 35 | Maxilla  | Left maxilla molars                             | 8w | Split mouth – implant on left side and tooth on right side and comparison between animals                                                                                                | Screw-type (DP Machining Inc, La Verne, Calif)                                              | 0,5x1         | Ti | Turned                                                              | Tissue level                            | 1: 1 on the left side                                | 1-stage | -  | 4w+0   | Yes                                       | No | NA                                                                                                                       | NA                                   | NA                                                                                                                                               | NA |
| 130. Yu et al      | 2017 | Mouse       | Experimental periodontitis and peri-implantitis in toll-like receptor 2 vs wild type mice | 62 | Maxilla  | Left maxillary molars                           | 6w | Split mouth – implant on the left side and tooth on the right side                                                                                                                       | Screw-type (DP Machining Inc, La Verne, Calif)                                              | 0,5x1 mm      | Ti | Turned                                                              | Tissue level                            | 1: 1 on the left side                                | 1-stage | -  | 4w+0   | No                                        | No | Yes – for 2w after tooth extractions and 4w after implant insertion                                                      | NA                                   | NA                                                                                                                                               | NA |
| 131. Hiyari et al  | 2018 | Mouse       | Ligature induced PI in different mouse strains                                            | 65 | Maxilla  | Left maxillary molars                           | 8w | Comparison of 3 mouse strains<br>(1) C57BL/6J (n=22)<br>(2) C3H/HeJ (n=22)<br>(3) A/J (n=21)<br>Comparison between animals + split mouth with implant on one side and tooth on the other | Screw-type (DP Machining Inc, La Verne, Calif)                                              | 0,5x1         | Ti | Turned                                                              | Tissue level                            | 1: 1 on the left side                                | 1-stage | -  | 4w+0   | Yes, to ligature or control (no ligature) | No | For 4w aft tooth extractions/ implant surgery respectively. Diluted in drinking water                                    | NA                                   | NA                                                                                                                                               | NA |
| 132. Hiyari et al  | 2018 | Mouse       | Progression of ligature induced periodontitis vs peri-implantitis                         | 85 | Maxilla  | Left maxillary molars (M1, M2, M3)              | 8w | Comparison between animals + split mouth with implant on one side and tooth on the other                                                                                                 | Screw-type (DP Machining Inc, La Verne, Calif)                                              | 0,5x1         | Ti | Turned                                                              | Tissue level                            | 1: 1 on the left side                                | 1-stage | -  | 4w+0   | Yes, to ligature or control (no ligature) | No | For 4w aft tooth extractions/ implant surgery respectively. Diluted in drinking water                                    | NA                                   | NA                                                                                                                                               | NA |
| 133. Huang et al   | 2018 | Dog, Beagle | Bone defect configuration depending on implant placement depth and implant type           | 6  | Mandible | PM2, PM3, PM4, M1 on both sides of the mandible | 8w | Interquadra nt: 2 of each implant type. 1 of each implant type placed 1,5 mm sub-crestally and the other 2 at bone level                                                                 | Screw-type (OsseoSpeed, (A) Astra, Mölndal, Sweden and (B) Integra-CP. Bicon, Boston, USA I | (A)&(B) 3,5x8 | Ti | (A) Fluoride modified TiOblast (B) Plasma-sprayed calcium-phosphate | Bone level and 1,5 mm sub-crestal level | 4 on the left side, total of 24 implant in the study | 2-stage | NA | 12w+4w | Yes                                       | No | For 7d after extractions.<br>(1) After tooth extraction<br>(2) After implant insertion<br>(3) 10d after abutment surgery | (1) 1w<br>(2) 1w<br>(3) 4w minus 10d | (1) & (2) Cleaning with 0,12% CHX solution<br>(3) 0,12% CHX irrigation every 2 <sup>nd</sup> day initially, then brush every 2 <sup>nd</sup> day |    |

Ti = titanium; TPS = titanium plasma sprayed; HA = hydroxyapatite, U = uncoated, turned/machined, AE – acid-etched, Before PI = prior to induction of experimental peri implantitis; After PI = following induction of experimental peri-implantitis; NA = Not available; CHX = Chlorhexidine

**Table S2.** Induction and outcome of experimentally induced peri-implant bone loss in studies included in the qualitative synthesis.

| Induction of peri-implant bone loss |           |                                                                             |                   |               |                   |                                     |                                                              |                                                                        |                                                         |                                                                          |                                |                                                                                     |                                                                                                              |       |                                                       |                                                    |                                     |                                                                                                            |                                                           |                                     |                    |
|-------------------------------------|-----------|-----------------------------------------------------------------------------|-------------------|---------------|-------------------|-------------------------------------|--------------------------------------------------------------|------------------------------------------------------------------------|---------------------------------------------------------|--------------------------------------------------------------------------|--------------------------------|-------------------------------------------------------------------------------------|--------------------------------------------------------------------------------------------------------------|-------|-------------------------------------------------------|----------------------------------------------------|-------------------------------------|------------------------------------------------------------------------------------------------------------|-----------------------------------------------------------|-------------------------------------|--------------------|
| Diagnostic markers                  |           |                                                                             |                   |               |                   |                                     |                                                              |                                                                        |                                                         |                                                                          | Peri-implant bone defect       |                                                                                     |                                                                                                              |       |                                                       |                                                    |                                     |                                                                                                            |                                                           |                                     |                    |
| Author                              | Published | Method (ligature/ overload/other)                                           | Ligature material | Ligature size | Ligature exchange | Duration                            | Control side protocol                                        | Clinical measurements (BoP/ PPD etc)                                   | Mobility                                                | Microbiological sampling (cultivation/ PCR)                              | X-ray                          | Histometric measurements                                                            | Histologic evaluation                                                                                        | Other | Registration (days from baseline/ ligature placement) | Vertical Bone loss Mean ± SD (mm)                  | Horizontal Bone loss Mean ± SD (mm) | Measuring method                                                                                           | Development after ligature removal (progression/ healing) | Bone loss ± SD (mm) at control side | Lost implants      |
| 1. Klinge                           | 1990      | Ligature                                                                    | Silk              | NA            | NA                | 5m                                  | Ligatures around corresponding PMs on the contralateral side | -                                                                      | -                                                       | -                                                                        | Periapical radiographs monthly | Marginal bone breakdown measured                                                    | Ground sections                                                                                              | -     | 150                                                   | Implants: 1 mm on average<br>Teeth 5 mm on average | NA                                  | Periapical radiographs                                                                                     | -                                                         | -                                   | No losses reported |
| 2. Hickey et al                     | 1991      | Ligature (submarginal, wrapped around abutment 15 times)                    | Silk              | 4-0           | No                | 45d                                 | Scaling and cleaning every 5d.                               | CAL, PPD, GI, PI,                                                      | -                                                       | Subgingival samples/ cultivation from all implants. At day 0, 14 and 45. | Periapical x-rays              | -                                                                                   | -                                                                                                            | -     | 45                                                    | NA, only CAL was measured                          | -                                   | -                                                                                                          | -                                                         | Control side: 0,08 mm               | -                  |
| 3. Akagawa et al                    | 1992      | Ligature (1 mm above gingival margin)                                       | Silk floss        | NA            | No                | 12m (monthly clinical examinations) | Brush, interdental brush, electric pencil brush. Interval NA | Pi, Gingival index according to Löe & Silness -63, PPD at 25g pressure | -                                                       | -                                                                        | -                              | -                                                                                   | -                                                                                                            | -     | 365                                                   | -                                                  | -                                   | -                                                                                                          | -                                                         | -                                   | None reported      |
| 4. Ericsson et al                   | 1992      | Spontaneous plaqueaccumulation                                              | -                 | -             | -                 | 90d                                 | -                                                            | Gross examination of plaque and inflammation                           | “non mobile” at end of experiment. Method NA            | -                                                                        | -                              | Decalcified blocks sectioned for light microscopy. Size and composition of ICT etc. | Composition of plaque associated ICT and abutment ICT tissues and cells. Some differences teeth and implants | -     | 90                                                    | Measurements in pocket depth, not in bone loss     | -                                   | -                                                                                                          | -                                                         | -                                   | -                  |
| 5. Leonhardt et al                  | 1992      | Ligature, subgingival around 2 implants and 2 teeth                         | Cotton            | NA            | No                | 42d                                 | None                                                         | -                                                                      | -                                                       | At baseline, atd21 plaque accumulation and 30d after ligature removal    | -                              | Middle implant reported in Lindhe 1992                                              | -                                                                                                            | -     | 42                                                    | -                                                  | -                                   | -                                                                                                          | -                                                         | -                                   | -                  |
| 6. Lindhe et al                     | 1992      | Ligature, submarginal Followed by 1 month plaque accumulation after removal | Silk              | NA            | Replaced after 3w | 6w                                  | Ligatures around 2 teeth                                     | PI, BoP,                                                               | All teeth and implantsclinically stable at end of study | In Leonhardt et al, 1992                                                 | Periapical radiographs         | Size and content of ICT reported in Morphometric measurements                       | Size and content of ICT reported in Morphometric measurements                                                | -     | 32 with ligature + 30 with spontaneous accumulation   | Implant 3,2±0,3<br>Tooth 1,1±0,6                   | -                                   | X-rays, periapical with eggen holder. Not specified whehter a mean- or max value was used for each implant | -                                                         | -                                   | None               |
| 7. Akagawa et al                    | 1993      | Ligature (1 mm above gingival margin)                                       | Silk              | NA            | No                | 12m (Bacterial sampling             | Brush, interdental brush,                                    | -                                                                      | -                                                       | Types and number of bacteria classified                                  | -                              | -                                                                                   | -                                                                                                            | -     | 365                                                   | -                                                  | -                                   | -                                                                                                          | -                                                         | -                                   | None reported      |





|                     |      |                                                                                        |              |     |                                             |                            |                                                                                       |                                                                                                                               |                                                         |   |                                                                   |                                                                                                                                                                          |                                                                                                                    |   |               |                                                                                    |   |                                                    |   |                                                                                                      |                                                                                  |
|---------------------|------|----------------------------------------------------------------------------------------|--------------|-----|---------------------------------------------|----------------------------|---------------------------------------------------------------------------------------|-------------------------------------------------------------------------------------------------------------------------------|---------------------------------------------------------|---|-------------------------------------------------------------------|--------------------------------------------------------------------------------------------------------------------------------------------------------------------------|--------------------------------------------------------------------------------------------------------------------|---|---------------|------------------------------------------------------------------------------------|---|----------------------------------------------------|---|------------------------------------------------------------------------------------------------------|----------------------------------------------------------------------------------|
| 13. Singh et al     | 1993 | Ligature                                                                               | Silk         | NA  | NA                                          | NA                         | Ligatures around all implants                                                         | Clinical evalutation of defect before and after treatment                                                                     | -                                                       | - | -                                                                 | Ground sections SEM                                                                                                                                                      | -                                                                                                                  | - | NA            | CTRL: 3,75±0,46<br>TEST 1: 2,94±0,49<br>TEST 2: 3,00±0,92                          | - | -                                                  | - | -                                                                                                    | -                                                                                |
| 14. Lang et al      | 1994 | (A) Ligature<br>(B) Spontaneous plaque accumulation<br>(C) Control                     | Silk         | NA  | New ligatures on top of old every 4w        | (A) 4m<br>(B) 2m<br>(C) 2m | Rubber cup and pumice once a week + Soft brush 3 times/w.                             | PI, GI, BoP, PPD with Florida probe set at 0,2N, CAL                                                                          | -                                                       | - | -                                                                 | Ground sections with fixed probe tip on mesial and distal sides: histologic probing depth, alveolar bone to probe tip distance, histologic attachment level              | -                                                                                                                  | - | 60, 240       | NA, only CAL was measured                                                          | - | -                                                  | - | Registered in vertical bone loss box                                                                 | Proble tip closer to bone crest in ligature group, similar in the 2 other groups |
| 15. Schüpbach et al | 1994 | Ligature                                                                               | Cotton floss | NA  | Yes every 1m                                | 5m                         | Ligatures around all implants                                                         | PI, GI, PPD, CAL                                                                                                              | Periodontometer of Muhlemann, 500g force                | - | Periapical, long cone, monthly                                    | Ground sections. New bone after surgery measured                                                                                                                         | -                                                                                                                  | - | 150           | NA, 30-50% bone loss, not further specified                                        | - | -                                                  | - | -                                                                                                    | -                                                                                |
| 16. Weber et al     | 1994 | Ligature, submarginal                                                                  | Silk         | 4-0 | No                                          | 60d                        | Ligatures around all implants, one dog received NSAID treatment and the other Placebo | Increasing GI and probing depths during ligature phase<br><br>TC-Sn-MDP given IV, uptake then measured with a radiation probe | All implants firmly anchored at start of ligature phase | - | IO at postsurgery, after 3m healing and after 60d ligature phase. | -                                                                                                                                                                        | -                                                                                                                  | - | 60            | NSAID (bone loss %/ m)<br>0,866±0,351%<br><br>Placebo<br>5.729±0,384%              | - | X-ray, periapical. Stents fabricated for each site | - | -                                                                                                    | All implants integrated at baseline (after 3m healing)                           |
| 17. Cook et al      | 1995 | Ligature (tightened between fixture and abutment, suture ends extended to oral cavity) | Silk         | 4-0 | No                                          | 4w, 8w, 16w and 26w        | Weekly brushing. No ligature                                                          | -                                                                                                                             | -                                                       | - | Routine dental radiographs                                        | Ground sections - Bone and tissue apposition, porosity of coating on experimental implants, HA thickness on contral implants                                             | Degree of inflammatory response (0-5): Minimal in both CSTi and HA at all time periods examined.                   | - | 28+56+112+182 | Histology results at 182d (5 animals):<br>14x CSTi: 1,96±0,94<br>28x HA: 2,69±1,27 | - | Histo. Mean + SD                                   | - | 2 lost: One prior to abutment surgery, the other removed at 2 <sup>nd</sup> surgery due to infection |                                                                                  |
| 18. Ericsson et al  | 1995 | Spontaneous plaque accumulation around the most distal implant on both sides           | -            | -   | -                                           | 9m                         | Daily brushing and dentifrice around the 2 medial implants on each side               | Gross examination of plaque and inflammation                                                                                  | -                                                       | - | -                                                                 | Decalcified blocks sectioned prepared for light microscopy according to method described by Berglundh in 1994 (EPON embedded sections). Size and composition of ICT etc. | Composition of plaque associated ICT and abutment ICT tissues and cells. No significant differences between groups | - | 270           | Measurements in pocket depth, not in bone loss                                     | - | Clinical                                           | - | -                                                                                                    | -                                                                                |
| 19. Hürzeler et al  | 1995 | Ligature                                                                               | Silk         | 4-0 | Additional ligatures over old ones every 2w | 3m                         | Ligatures around all implants                                                         | -                                                                                                                             | -                                                       | - | -                                                                 | -                                                                                                                                                                        | -                                                                                                                  | - | 90            | 30-50% bone loss. No further details provided.                                     | - | -                                                  | - | -                                                                                                    | -                                                                                |

|                        |      |                                                                                                |                |    |                                                |                                                                                                                         |                                                                                                                                                                                                                                                                    |               |                                        |   |                             |                                                             |                                                                                         |   |                                                                                          |                                                                                                                                                                                                                                   |                                                       |                                               |   |                         |                                                                        |
|------------------------|------|------------------------------------------------------------------------------------------------|----------------|----|------------------------------------------------|-------------------------------------------------------------------------------------------------------------------------|--------------------------------------------------------------------------------------------------------------------------------------------------------------------------------------------------------------------------------------------------------------------|---------------|----------------------------------------|---|-----------------------------|-------------------------------------------------------------|-----------------------------------------------------------------------------------------|---|------------------------------------------------------------------------------------------|-----------------------------------------------------------------------------------------------------------------------------------------------------------------------------------------------------------------------------------|-------------------------------------------------------|-----------------------------------------------|---|-------------------------|------------------------------------------------------------------------|
| 20.<br>Marinello et al | 1995 | Ligature, submarginal position                                                                 | Cotton         | NA | No                                             | 4-6w (at approx. 25% destruction of original bone height) + 1m (2 dogs) and 3 m (3 dogs)spontaneous plaque accumulation | Ligatures around all implants                                                                                                                                                                                                                                      | -             | -                                      | - | -                           | Various measures of mucosa and plaque associated infiltrate | Various measures of mucosa and cell+tissue composition of plaque associated infiltrate. | - | 150+90                                                                                   | NA – At 3m from ligature removal, scar tissue healing without evidence of ongoing tissue destruction was noticed compared to the 1m group.                                                                                        | -                                                     | -                                             | - | -                       | -                                                                      |
| 21.<br>Warrer et al    | 1995 | Ligature – supramarginal position without attempt to place them submarginally                  | Cotton-wool    | NA | Every 3m with the same supramarginal technique | 9m                                                                                                                      | 4 groups:<br>1-2: Keratinized mucosa with- (1) and without ligature (2)<br>3-4: Non-keratinized mucosa with- (3) and without ligature (4)<br><br>PI, BoP, PPD, CAL and recession on 4 surfaces per implant (later pooled) every 3m<br><br>Data in table 1 of paper | -             | -                                      | - | -                           | Ground sections                                             | Remaining bone height on mesial and distal sides                                        | - | 270                                                                                      | Bone loss calculated from fig 7:<br><br>(1) 0,96 mm<br>(2) 0,8 mm<br>(3) 1,65 mm<br>(4) 1,05 mm<br><br>Bone-implant contact leangth in % of implant leangth (table 1):<br><br>(1) 63±7,5<br>(2) 65±9,01<br>(3) 54,38<br>(4) 61,88 | Histo - mean of mesial and distal aspects of implants |                                               |   | All implants integrated |                                                                        |
| 22.<br>Ericsson et al  | 1996 | Ligature (submarginal)                                                                         | Cotton (floss) | NA | No                                             | 6-8w (about 20% bone loss) + 1m spontaneous plaqueaccumulation followed by amoxicillin for 3w                           | Ligatures around all implants                                                                                                                                                                                                                                      | -             | -                                      | - | Before ligature and at 6-8w | Ground sections                                             | -                                                                                       | - | 5m + 1w+10d attfer ligature removal. (3w amoxicillin starting 1m after ligature removal) | No specific measurement at ligature removal                                                                                                                                                                                       | -                                                     | X-ray                                         | - | -                       | -                                                                      |
| 23. Isidor             | 1996 | (1) Overload on one side, (2) Ligature on other side and symphysial region (marginal position) | Cotton cord    | NA | -                                              | 18m                                                                                                                     | (1) Brush once/ week. Debridement once/ month. (2)                                                                                                                                                                                                                 | BoP, PPD, CAL | Periotest and manual mobility every 3m | - | IO. Parallelling technique  | Ground sections<br>Marginal bone loss<br>BIC                | -                                                                                       | - | 540                                                                                      | (1) Periotest: 2 implants removed due to mobility. 6 remaining with values 6, 18, 45, 25, -7, -7. Almost complete loss of integration in all but 2                                                                                | -                                                     | Light microscopic analysis of ground sections | - | -                       | 2 implants removed at abutment surgery<br>2 lost during overload phase |

|                    |      |                                                            |                         |     |                                             |                                         |                                                                                                                                                                                                              |                                                   |                                        |                                                                                                                           |                                                   |                                        |                                          |   |        |                                                                                                                                                                           |                                                     |                                                                                                        |   |   |                                                            |  |  |
|--------------------|------|------------------------------------------------------------|-------------------------|-----|---------------------------------------------|-----------------------------------------|--------------------------------------------------------------------------------------------------------------------------------------------------------------------------------------------------------------|---------------------------------------------------|----------------------------------------|---------------------------------------------------------------------------------------------------------------------------|---------------------------------------------------|----------------------------------------|------------------------------------------|---|--------|---------------------------------------------------------------------------------------------------------------------------------------------------------------------------|-----------------------------------------------------|--------------------------------------------------------------------------------------------------------|---|---|------------------------------------------------------------|--|--|
|                    |      |                                                            |                         |     |                                             |                                         | No hygiene                                                                                                                                                                                                   |                                                   |                                        |                                                                                                                           |                                                   |                                        |                                          |   |        | implants with 1,8 and 1,9 mm bone loss resp. CAL loss: 0,6 mm (2) Periotest: -6, -5, -6, -7, -2, -5, -5, -4, -6, -5 Marginal bone loss (mm): 2,4 (0,8-4) CAL loss: 1,1 mm |                                                     |                                                                                                        |   |   |                                                            |  |  |
| 24. Persson et al  | 1996 | Ligature, submarginal                                      | Cotton                  | NA  | -                                           | About 6w/ 20% radiographic bone loss    | Ligatures on both sides                                                                                                                                                                                      | Bone loss measured with probe during PI-surgery.  | -                                      | -                                                                                                                         | IO                                                | Marginal bone loss after GBR.          | Cell composition and localisation of ICT | - | 42     | Implant shoulder to bottom of defect: 1,8±0,45 (30 days after ligature removal)                                                                                           | -                                                   | Periodontal probe, mean value of 4 sides per implant                                                   | - | - | -                                                          |  |  |
| 25. Schou et al    | 1996 | Ligature – subgingival and supragingival with lingual knot | Silk, braided (Ethicon) | 3-0 | no                                          | 7w                                      | (1) Implant + - ligature (2) Ankylosed tooth +- ligature (3) normal tooth +- ligature Ligatures around all implants, contralateral 2 <sup>nd</sup> molar and non-ligated second premolar (anterior abutment) | BoP, PPD, CAL. Electronic probe 25g, 0,5 mm diam. | -                                      | Phase contrast microscopy for presence and amount of various bacteria                                                     | -                                                 | -                                      | -                                        | - | 49     | -                                                                                                                                                                         | -                                                   | -                                                                                                      | - | - | 1 implant and 2 replanted teeth planned to remain ligated. |  |  |
| 26. Fritz et al    | 1997 | Ligature                                                   | Silk (braided)          | NA  | No                                          | 6m                                      |                                                                                                                                                                                                              | Plaque score, redness, PPD                        | NA                                     | -                                                                                                                         | Periapical with “quantitative subtraction method” | -                                      | -                                        | - | 90+180 | Root form implants: 90d: 1,35±0,24 180d: 1,72±0,28<br><br>Plate form: 90d: 1,59±0,44 180d: 1,89±0,45                                                                      | -                                                   | "X-ray periapical with standardized technique Quantitative subtraction method"                         | - | - | -                                                          |  |  |
| 27. Hanisch et al  | 1997 | Ligature (submarginal)                                     | Cotton                  | NA  | Yes, every 1m                               | 10m + 1m additional plaque accumulation | Ligatures around all implants                                                                                                                                                                                | Modified PI, GI, BOP, PPD, CAL. Calibrated probe  | Periotest, Siemens                     | Submucosal samples from 1 randomly chosen implant in maxilla and mandible respectively. Morphotype, culture and DNA-probe | -                                                 | -                                      | -                                        | - | 300    | Maxilla: 3,3±1,2 Mandible: 3,4±1,4 Overall: 3,3±1,3 (2 months after ligature removal)                                                                                     | Maxilla: 2,0±0,5 Mandible: 2,0±0,4 Overall: 2,0±0,5 | Clinical measurement at abutment connection and at reconstructive surgery after removal of soft tissue | - | - | 1                                                          |  |  |
| 28. Hürzeler et al | 1997 | Ligature                                                   | Silk                    | 4-0 | Additional ligatures over old ones every 2w | 3m                                      | Ligatures around all implants                                                                                                                                                                                | --                                                | -                                      | -                                                                                                                         | -                                                 | -                                      | -                                        | - | 90     | -                                                                                                                                                                         | -                                                   | -                                                                                                      | - | - | -                                                          |  |  |
| 29. Isidor         | 1998 | (1) Overload on one side, (2) Ligature on other side and   | Cotton cord             | NA  | -                                           | 18m                                     | (1) Brush once/ week. Debridem                                                                                                                                                                               | -                                                 | Periotest and manual mobility every 3m | -                                                                                                                         | IO. Parallelling technique                        | Ground sections Marginal bone loss BIC | -                                        | - | 540    | Fig. 2 in article X-rays (540 d) Overload: 4,6 Ligature: : 1,8                                                                                                            | -                                                   | "X-rays Periapical with                                                                                | - | - | 2 implants removed at abutment surgery                     |  |  |

|                              |      |                                                                                                                  |                                                                                                            |                                                        |                                                                  |                            |                                                                                                                 |                                                                            |                                                 |                                                                                                                                         |  |                                                                                                                                |                                                                                                                                                                     |                                                                                                                                                                  |   |                                                                                  |                                                                                                                                                                                                                                                                                                                    |   |                                                                                                                                                                                                                         |   |   |                                                                                       |
|------------------------------|------|------------------------------------------------------------------------------------------------------------------|------------------------------------------------------------------------------------------------------------|--------------------------------------------------------|------------------------------------------------------------------|----------------------------|-----------------------------------------------------------------------------------------------------------------|----------------------------------------------------------------------------|-------------------------------------------------|-----------------------------------------------------------------------------------------------------------------------------------------|--|--------------------------------------------------------------------------------------------------------------------------------|---------------------------------------------------------------------------------------------------------------------------------------------------------------------|------------------------------------------------------------------------------------------------------------------------------------------------------------------|---|----------------------------------------------------------------------------------|--------------------------------------------------------------------------------------------------------------------------------------------------------------------------------------------------------------------------------------------------------------------------------------------------------------------|---|-------------------------------------------------------------------------------------------------------------------------------------------------------------------------------------------------------------------------|---|---|---------------------------------------------------------------------------------------|
|                              |      | symphysial<br>region (marginal<br>position)                                                                      |                                                                                                            |                                                        |                                                                  |                            | ent once/<br>month. (2)<br>No<br>hygiene                                                                        |                                                                            |                                                 |                                                                                                                                         |  |                                                                                                                                |                                                                                                                                                                     |                                                                                                                                                                  |   |                                                                                  | Histology (540 d)<br>Overload: 4,8<br>Ligature: 2,4                                                                                                                                                                                                                                                                |   | parallelling<br>technique<br>Not specified<br>whehter a<br>mean- or<br>max value<br>was used for<br>each implant<br>Histo.<br>Mean of 2<br>mid-implant<br>sections from<br>the buccal<br>aspect of<br>each implant<br>" |   |   | 2 lost during<br>overload<br>phase                                                    |
| 30. Isidor                   | 1997 | (1) Overload on<br>one side, (2)<br>Ligature on other<br>side and<br>symphysial<br>region (marginal<br>position) | Cotton<br>cord                                                                                             | NA                                                     | -                                                                | 18m                        | (1) Brush<br>once/<br>week.<br>Debridem<br>ent once/<br>month. (2)<br>No<br>hygiene                             | -                                                                          | Periotesta<br>nd manual<br>mobility<br>every 3m | -                                                                                                                                       |  | IO.<br>Parallelling<br>technique                                                                                               | Ground sections<br>Marginal bone loss<br>BIC                                                                                                                        | -                                                                                                                                                                | - | 540                                                                              | (1) Periotest: 2 implants<br>removed due to mobility.<br>6 remaining with values<br>6, 18, 45, 25, -7, -7.<br>Almost complete bone<br>loss in all but 2 implants<br>with 1,8 and 1,9 mm<br>bone loss resp.<br>(2) Periotest: -6, -5, -6, -<br>7, -2, -5, -5, -4, -6, -5<br>Marginal bone loss<br>(mm): 2,4 (0,8-4) | - | Light<br>microscopic<br>analysis of<br>ground<br>sections                                                                                                                                                               | - | - | 2 implants<br>removed at<br>abutment<br>surgery<br>2 lost during<br>overload<br>phase |
| 31. Saito<br>et al           | 1996 | Spontaneous<br>plaque<br>accumulation<br>around<br>functionally<br>loaded implants.<br>Soft food.                | None                                                                                                       | -                                                      | -                                                                | 180d                       | 2 different<br>implant<br>types vs<br>control<br>teeth,<br>plaque<br>accumulat<br>ion around<br>all<br>implants | At baseline, 90d<br>and 180d: PI,<br>PPD, BoP,                             | At<br>baseline<br>90d and<br>180d:<br>Periotest | Yes, baseline, 90d<br>and 180d:<br>detection of black<br>pigmented rods<br>and actinobacillus<br>actinomycetemco<br>mitans respectively |  | IOs with<br>semi-<br>standardized<br>film holder<br>at implant<br>installation,<br>abutment<br>connection,<br>90d and<br>180d. | -                                                                                                                                                                   | -                                                                                                                                                                | - | 180                                                                              | No obvious bone<br>resorption in any group                                                                                                                                                                                                                                                                         | - | -                                                                                                                                                                                                                       | - | - |                                                                                       |
| 32.<br>Tillmann<br>s et al   | 1997 | Ligature,<br>submarginal                                                                                         | Cotton,<br>braided<br>retraction<br>cord<br>(GingiBrai<br>d, VanR<br>Dental<br>Products,<br>Oxnard,<br>CA) | NA<br>(although<br>type and<br>brand<br>mentione<br>d) | Only if<br>necessary<br>at plaque<br>control<br>appointmen<br>ts | 3m 6 dogs<br><br>6m 8 dogs | Ligatures<br>on one<br>side,<br>continued<br>plaque<br>control on<br>the other<br>side of the<br>mandible       | CAL, PPD at<br>baseline and then<br>monthly                                | Periotest<br>at baseline<br>and then<br>monthly | No (reported in<br>separate paper)                                                                                                      |  | No                                                                                                                             | No (reported in separate<br>study)                                                                                                                                  | No (reported in separate study)                                                                                                                                  | - | 90 (n=14)<br>and 180<br>(n=8)<br>respectivel<br>y after<br>ligature<br>placement | NA, only CAL measures<br>provided                                                                                                                                                                                                                                                                                  | - | CAL<br>measured<br>with probe                                                                                                                                                                                           | - | - | 3 implants<br>lost, 1 of each<br>kind.                                                |
| 33.<br>Abraham<br>sson et al | 1998 | Plaque<br>accumulation                                                                                           | -                                                                                                          | -                                                      | -                                                                | 5m                         | -                                                                                                               | "redness, swelling<br>and bleeding on<br>gentle probing in<br>all systems" | -                                               | -                                                                                                                                       |  | -                                                                                                                              | LM analysis of ground<br>sections. Localisation,<br>vertical extension and area of<br>ICT. Marginal bone position<br>with abutment/fixture<br>junction as reference | Fractions of ICT infiltrated with<br>Collagen, vascular structures,<br>fibroblasts, macrophages,<br>lymphocytes, plasma cells, PMN cells<br>and residual tissue. | - | 150                                                                              | NO BASELINE<br>RECORDED Distance<br>from abutment-fixture<br>(Polished-TPS in ITI-<br>implants) junction to<br>marginal bone:                                                                                                                                                                                      | - | Histo.<br>Mean + sd                                                                                                                                                                                                     | - | - | None reported                                                                         |



|                         |      |                                                                                                          |        |    |                                        |    |                                     |                                                                                                                                   |                               |   |                                  |                                               |                                                                                                                                                                                                                                                                                                                                     |   |     |                                                                                                                                                                 |   |                                                                                                                                                                                              |   |                                                                                                                     |                     |
|-------------------------|------|----------------------------------------------------------------------------------------------------------|--------|----|----------------------------------------|----|-------------------------------------|-----------------------------------------------------------------------------------------------------------------------------------|-------------------------------|---|----------------------------------|-----------------------------------------------|-------------------------------------------------------------------------------------------------------------------------------------------------------------------------------------------------------------------------------------------------------------------------------------------------------------------------------------|---|-----|-----------------------------------------------------------------------------------------------------------------------------------------------------------------|---|----------------------------------------------------------------------------------------------------------------------------------------------------------------------------------------------|---|---------------------------------------------------------------------------------------------------------------------|---------------------|
| 39.<br>Machado<br>et al | 1999 | Lugatures,<br>submarginal<br>technique                                                                   | Cotton | NA | No                                     | 1m | Ligatures<br>around all<br>implants | -                                                                                                                                 | -                             | - | -                                | -                                             | -                                                                                                                                                                                                                                                                                                                                   | - | 30  | Bone loss not<br>specifically measured                                                                                                                          | - | -                                                                                                                                                                                            | - | -                                                                                                                   | -                   |
| 40.<br>Persson<br>et al | 1999 | Ligature                                                                                                 | Cotton | NA | New<br>ligatures<br>after 1m<br>and 2m | 3m | -                                   | -                                                                                                                                 | -                             | - | IO                               | -                                             | -                                                                                                                                                                                                                                                                                                                                   | - | 90  | Baseline<br>Average of 1,33±0,91,<br>1,60±0,47 and<br>1,42±0,76<br><br>30 days after ligature<br>removal<br>Average of 1,47±0,91,<br>3,37±0,20 and 3,54±0,67    | - | Periapical x-<br>rays with<br>individual<br>film holders<br>prepared for<br>each animal<br>and site. Not<br>specified<br>whehter a<br>mean- or<br>max value<br>was used for<br>each implant. | - | -                                                                                                                   |                     |
| 41.<br>Wetzel et<br>al  | 1999 | Ligature around<br>implants                                                                              | Silk   | NA | NA                                     | 4m | Ligatures<br>around all<br>implants | -                                                                                                                                 | -                             | - | IO at<br>different<br>intervcals | Saw sections of plastic<br>embedded specimens | After treatment: Original defect and<br>bone fill after GTR                                                                                                                                                                                                                                                                         | - | 120 | (1) TPS: 3,22 mm<br>(1), (4): SLA: 2,77<br>(3) U: 3,18                                                                                                          | - | Histo. Mesial<br>and distal<br>aspects<br>investigated.<br>Not specified<br>whether an<br>average of<br>mesial and<br>distal/ or<br>greatest<br>value was<br>used.                           | - | 2 lost during<br>ligature phase.<br>6 lost after<br>membrane<br>phase and 1<br>during<br>histological<br>sectioning |                     |
| 42.<br>Comut et<br>al   | 2000 | Ligature (2 of 4<br>dogs in the study.<br>Other 2<br>euthanized before<br>peri-implantitis<br>induction) | Silk   | NA | No                                     | 4w | Daily<br>brushing                   | PPD (0,2 N<br>standardized<br>force, average<br>depth from 4<br>measuring sites).<br>No significant<br>increase between<br>groups | -                             | - | -                                | Ground sections.                              | Inflammatory cell count. Percentage of<br>epithelium, connective tissue and bone<br>apposed to the area of interest (the<br>apical 1 mm of the transmucosal part<br>ot the implant). Orientation of collagen<br>fibers in the gingival connective tissue.<br>More inflammatory cells in ligature,<br>but no meaningful differences. | - | 28  | -                                                                                                                                                               | - | -                                                                                                                                                                                            | - | None                                                                                                                |                     |
| 43.<br>Machado<br>et al | 2000 | Lugatures,<br>submarginal<br>technique                                                                   | Cotton | NA | No                                     | 1m | Ligatures<br>around all<br>implants | -                                                                                                                                 | -                             | - | -                                | -                                             | -                                                                                                                                                                                                                                                                                                                                   | - | 30  | Bone loss not<br>specifically measured                                                                                                                          | - | -                                                                                                                                                                                            | - | -                                                                                                                   | -                   |
| 44.<br>Miyata et<br>al  | 2000 | Overload<br>100 µm<br>180 µm<br>250 µm<br>during 4w                                                      | -      | -  | -                                      | 4w | No<br>overload                      | No inflammatory<br>responses at end<br>of study but<br>increase PPD with<br>increasing<br>overload<br>(PPD, BoP)                  | Yes<br>assessed<br>clinically | - | -                                | Marginal bone loss measured                   | Inflammatory cell infiltrate assessed                                                                                                                                                                                                                                                                                               | - | 28  | No specific values<br>provided<br>Control: No bone loss<br>100 µm: None<br>180 µm: To half the<br>implant<br>250 µm: Almost to the<br>apical end of the implant | - | Histological<br>measrement                                                                                                                                                                   | - | -                                                                                                                   |                     |
| 45.<br>Nociti et<br>al  | 2000 | Ligature,<br>submarginal                                                                                 | Cotton | NA | No                                     | 1m | Ligatures<br>around all<br>implants | -                                                                                                                                 | -                             | - | -                                | -                                             | -                                                                                                                                                                                                                                                                                                                                   | - | 30  | Amount of bone loss not<br>reported                                                                                                                             | - | Histo                                                                                                                                                                                        | - | -                                                                                                                   | No implants<br>lost |

|                            |       |                                                                                                                                |                 |    |                       |     |                                                                                                                                                     |                                                        |   |                               |                                                                                      |                                                                                                                                                                                                   |   |   |     |                                                                                                                                                                                                     |    |                                                                                                                                                                                                                                                                  |   |   |                                                                       |
|----------------------------|-------|--------------------------------------------------------------------------------------------------------------------------------|-----------------|----|-----------------------|-----|-----------------------------------------------------------------------------------------------------------------------------------------------------|--------------------------------------------------------|---|-------------------------------|--------------------------------------------------------------------------------------|---------------------------------------------------------------------------------------------------------------------------------------------------------------------------------------------------|---|---|-----|-----------------------------------------------------------------------------------------------------------------------------------------------------------------------------------------------------|----|------------------------------------------------------------------------------------------------------------------------------------------------------------------------------------------------------------------------------------------------------------------|---|---|-----------------------------------------------------------------------|
| 46.<br>Shibutani<br>et al  | 2000  | Ligature,<br>submarginal<br>technique                                                                                          | Silk            | NA | NA                    | 12w | Ligaures<br>around all<br>implants.<br>IM<br>bisphosph<br>onate<br>injection<br>(Pamidron<br>ate 0,6<br>mg/ kg IM<br>every 3<br>days) vs<br>control | -                                                      | - | -                             | Pariapical                                                                           | -                                                                                                                                                                                                 | - | - | 84  | Clinical bone loss (mm)<br>in:<br><br>Pamidronate group<br>1,59±0,55<br><br>Control group<br>2,41±0,48                                                                                              | NA | Clinical<br>measurement<br>with<br>periodontal<br>probe on the<br>buccal side<br>at center of<br>the implant                                                                                                                                                     | - | - | -                                                                     |
| 47.<br>Deppe et<br>al      | 2001  | Ligature                                                                                                                       | Cotton<br>floss | NA | No                    | 3m  | Ligatures<br>around all<br>implants                                                                                                                 | -                                                      | - | -                             | Periapical<br>X-rays Long<br>cone<br>technique<br>with custom<br>made film<br>holder | Ground sections – computer<br>assisted histometry: Size of<br>former bone defect and<br>reappositioned bone                                                                                       | - | - | 90  | Group 1: 1,7±0,8 min<br>0,00 max 2,90<br>Group 2: 1,7±0,9 min 0,1<br>max 3,70<br>Group 3: 1,7±0,5 min 0,9<br>max 3,30<br>(all 3 groups identical in<br>PI but differing in<br>subsequent treatment) | -  | X-ray<br>peripical,<br>customized<br>holder. Mean<br>value of<br>mesial and<br>distal aspect<br>of each<br>implant.<br>X-ray,<br>periapical,<br>Quantitative<br>subtraction<br>technique.<br>Average of<br>mesial and<br>distal bone<br>loss for each<br>implant | - | - | -                                                                     |
| 48.<br>McCrack<br>en et al | 2001  | 2 years of normal<br>loading (partial<br>god denture)<br>followed by Silk<br>suture around 20<br>randomly selected<br>implants | Silk suture     | NA | No                    | 6m  | NA –<br>Continued<br>monthly<br>plaque<br>control?                                                                                                  | -                                                      | - | -                             | Quantitative<br>substraction<br>technique                                            | Plastic embedded ground<br>sections – Bone to implant<br>contact. Vertical marginal<br>bone loss                                                                                                  | - | - | 180 | Root form with ligature:<br>1.33 ± 0,30<br>Root form control:<br>0,71 ± 0,32<br>Plate form with ligature:<br>1,72 ± 0,47<br>Plate form control:<br>0,28 ± 0,13                                      | -  |                                                                                                                                                                                                                                                                  | - | - | 1 root form<br>and 4 plate<br>form implants<br>failed to<br>integrate |
| 49.<br>Nociti et<br>al.    | 2001a | Ligature                                                                                                                       | Cotton          | NA | NP                    | 4w  | -                                                                                                                                                   | -                                                      | - | -                             | -                                                                                    | BIC                                                                                                                                                                                               | - | - | 182 | Only BIC was measured                                                                                                                                                                               | -  | Histo                                                                                                                                                                                                                                                            | - | - | None reported                                                         |
| 50.<br>Nociti et<br>al.    | 2001b | Ligature                                                                                                                       | Cotton          | NA | NP                    | 30d | -                                                                                                                                                   | Attachment level                                       | - | A lot of bacterial<br>species | -                                                                                    | -                                                                                                                                                                                                 | - | - | 30  | Loss of attachment level<br>3.70±0.54                                                                                                                                                               | -  | X-ray and<br>histo                                                                                                                                                                                                                                               | - | - | None reported                                                         |
| 51.<br>Nociti et<br>al.    | 2001c | Ligature                                                                                                                       | Cotton          | NA | NP                    | 4w  | -                                                                                                                                                   | Vertical bone fill                                     | - | -                             | -                                                                                    | -                                                                                                                                                                                                 | - | - | 28  | Bone loss was not<br>measured, only vertical<br>bone fill after different<br>GBR approaches                                                                                                         | -  | Clinical                                                                                                                                                                                                                                                         | - | - | None reported                                                         |
| 52.<br>Nociti et<br>al     | 2001d | Ligature,<br>submarginal                                                                                                       | Cotton          | NA | No                    | 4w  | Ligatures<br>around all<br>implants                                                                                                                 | Bone loss<br>measured before<br>and after<br>treatment | - | -                             | -                                                                                    | -                                                                                                                                                                                                 | - | - | 28  | Bone loss was not<br>measured, only vertical<br>bone fill after different<br>GBR approaches                                                                                                         | -  | Clinical                                                                                                                                                                                                                                                         | - | - | None reported                                                         |
| 53.<br>Persson<br>et al.   | 2001a | Ligature                                                                                                                       | Cotton          | NA | (1) 1 mo;<br>(2) 2 mo | 3m  | -                                                                                                                                                   | -                                                      | - | -                             | IO                                                                                   | IC-BDc (mm), IC-PM (mm),<br>PM-aJE (mm), aJE-CBI<br>(mm), IC-CBI (mm), IC-<br>BDh (mm)<br>Legends: implant shoulder<br>(IC), bottom of the<br>bone defect (BDc), the<br>marginal level of bone in | - | - | 90  | Turned: 3.1±0.5 SLA:<br>3.2±0.3 (120 days)                                                                                                                                                          | -  | X-ray                                                                                                                                                                                                                                                            | - | - | -                                                                     |



|                         |       |                                                                                                                                                                                                                                                                                                          |                         |     |                                                           |                                               |                                 |                                                                                                                                          |   |   | contact with the implant (CBI), the marginal portion of the periimplant mucosa (PM), the apical termination of the barrier epithelium (aJE), bottom of the defect (BDh) |                                                                                                                 |                                                                                                                                  |   |     |                                                                                                                                                                     |   |                                                                                                         |   |   |   |
|-------------------------|-------|----------------------------------------------------------------------------------------------------------------------------------------------------------------------------------------------------------------------------------------------------------------------------------------------------------|-------------------------|-----|-----------------------------------------------------------|-----------------------------------------------|---------------------------------|------------------------------------------------------------------------------------------------------------------------------------------|---|---|-------------------------------------------------------------------------------------------------------------------------------------------------------------------------|-----------------------------------------------------------------------------------------------------------------|----------------------------------------------------------------------------------------------------------------------------------|---|-----|---------------------------------------------------------------------------------------------------------------------------------------------------------------------|---|---------------------------------------------------------------------------------------------------------|---|---|---|
| 54.<br>Persson et al.   | 2001b | Ligature                                                                                                                                                                                                                                                                                                 | Cotton                  | NA  | -                                                         | 3-4 mo                                        | -                               | -                                                                                                                                        | - | - | IO                                                                                                                                                                      | BIC (%)                                                                                                         | -                                                                                                                                | - | 90  | Approx. 50% of bone was lost after 150 days. Measurements of re-osseointegration                                                                                    | - | Histo                                                                                                   | - | - | - |
|                         |       | 4 first monkeys:<br>(1) Healthy group: Maintained hygiene VS<br>(2) Mild mucositis/gingivitis group: Discontinued hygiene and special cover screw                                                                                                                                                        |                         |     |                                                           |                                               |                                 |                                                                                                                                          |   |   |                                                                                                                                                                         |                                                                                                                 |                                                                                                                                  |   |     |                                                                                                                                                                     |   |                                                                                                         |   |   |   |
| 55.<br>Schou et al      | 2001  | 4 last monkeys:<br>(3) Severe mucositis/gingivitis group: Discontinued hygiene and special cover screw FOR 8M + ligature during last 3w before sacrifice VS<br>(4) Periimplantitis/periodontitis group: Liagture for 7m + inoculation of P. Gingivalis 3t/ w for 2w starting 1m after ligature placement | Silk, braided (Ethicon) | 3-0 | Ligatures pushed further down the pocket or changed 1t /m | 3w and 7m respectively for groups (3) and (4) | See the method box: 4 groups    | Width of keratinized gingiva, PI, BoP, PPD, CAL with Peri-probe (40 g at 3 mm and 30g at 9 mm. (Peri Probe; Samhall Pile Dental, Sweden) | - | - | IO, long cone                                                                                                                                                           | Probe tip glued to specimen at sacrifice. Histologic probing depth and Probe tip to alveolar bone was assessed. | Cutting and grinding technique – general description of the different groups                                                     | - | 210 | See figure 7 in the paper, result presented in diagram, no numbers provided. 2-4 mm bone loss generally in the 7m ligature group, no bone loss in the other groups. | - | Probing. (Probe tip closer to bone around implants than teeth in all groups except (1) healthy controls | - | - | - |
| 56.<br>Deppe et al      | 2002  | Ligature                                                                                                                                                                                                                                                                                                 | Cotton floss            | NA  | No                                                        | 3m                                            | Ligatures around all implants   | -                                                                                                                                        | - | - | -                                                                                                                                                                       |                                                                                                                 | Determination of Ti deposition in oral mucosa, regional lymph nodes, spleen, liver, lung and kidney after 3 different treatments | - | 90  | -                                                                                                                                                                   | - | -                                                                                                       | - | - |   |
| 57.<br>Gotfredsen et al | 2002  | Ligature (submarginal) and loading                                                                                                                                                                                                                                                                       | Cotton                  | NA  | Yes, every 4w                                             | 16w+8w continued plaque accumulat             | Inter-quadrant. 3 groups: (M+L) | -                                                                                                                                        | - | - | Peri-apical X-rays. Custom made film                                                                                                                                    | Ground sections                                                                                                 | Fluorochrome labels (Calcein green 15mg/kg injected iv at w50 and w52; Alizarin Complexone 25mg/kg injected iv w56 and w58)      | - | 112 | 2,5 (at 112d/ ligature removal)                                                                                                                                     | - | X-ray peripical, customized holder. Mean                                                                | - | - | - |

|                  |      |                                                                                                                                                                                                                                   |                         |     |                                                           |                                             |                                                                           |                                                                                                          |   |                                           |               |                             |                                       |                                                                                                     |         |                                                                                                                                                        |   |                                                                                                                             |                                                    |   |                                                                  |  |  |
|------------------|------|-----------------------------------------------------------------------------------------------------------------------------------------------------------------------------------------------------------------------------------|-------------------------|-----|-----------------------------------------------------------|---------------------------------------------|---------------------------------------------------------------------------|----------------------------------------------------------------------------------------------------------|---|-------------------------------------------|---------------|-----------------------------|---------------------------------------|-----------------------------------------------------------------------------------------------------|---------|--------------------------------------------------------------------------------------------------------------------------------------------------------|---|-----------------------------------------------------------------------------------------------------------------------------|----------------------------------------------------|---|------------------------------------------------------------------|--|--|
|                  |      |                                                                                                                                                                                                                                   |                         |     |                                                           | ion followed by 12 weeks of lateral loading | mucositis +load (P) Peri-implantitis Loading (P+L) Peri-implantitis +load |                                                                                                          |   | holder. Every 2 weeks between w24 and w60 |               |                             |                                       | Bone density measured: Higher in loaded implants. No significant differences between TURNED and SLA |         |                                                                                                                                                        |   |                                                                                                                             | value of mesial and distal aspect of each implant. |   |                                                                  |  |  |
| 58. Miyata et al | 2002 | Test (2 monkeys): Overload 250 μm + no hygiene control for 4w, then hygiene and no overload for an additional 4w. Neg. control (1 monkey): Hygiene and no overload for 8w Pos. control (1 monkey): Overload and no hygiene for 8w | -                       | -   | -                                                         | 4 and 8 w respectively                      | No overload. Weekly hygiene.                                              | No mobility and no BoP in test and neg. control monkeys. BoP and moderate pus discharge in Pos. control. | - | -                                         | -             | Marginal bone loss measured | Inflammatory cell infiltrate assessed | -                                                                                                   | 28, 56  | Test monkeys: Bone resorption reaching the apical third<br>Neg. control: No bone resorption<br>Pos. control: Bone resorption reaching the apical third | - | Histo                                                                                                                       | -                                                  | - | -                                                                |  |  |
| 59. Schou et al  | 2002 | Submarginal ligature and supragingival cross elastics and inoculation of P. Gingivalis                                                                                                                                            | Silk, braided (Ethicon) | 3-0 | NA                                                        | 9-18 mm until 4-6 mm marginal bone loss     | Ligatures around all implants                                             | Width of keratinized mucosa, PI, BoP, PPD, CAL                                                           | - | -                                         | IO, long cone | -                           | -                                     | -                                                                                                   | 270-540 | NA, since ligature period differed among animals                                                                                                       | - | X-ray, periapical, quantitative digital subtraction<br>Not specified whehter a mean- or max value was used for each implant | -                                                  | - | 2 maxillary implants lost due to mobility during PI-induction    |  |  |
| 60. Schou et al  | 2002 | ubmarginal ligature and supragingival cross elastics and inoculation of P. Gingivalis                                                                                                                                             | Silk, braided (Ethicon) | 3-0 | NA                                                        | 9-17 mm until 4-6 mm marginal bone loss     | Ligatures around all implants                                             | PI, BoP, PPD, CAL                                                                                        | - | -                                         | IO, long cone | -                           | -                                     | -                                                                                                   | 270-510 | NA, since ligature period differed among animals                                                                                                       | - | X-ray, periapical, quantitative digital subtraction<br>Not specified whehter a mean- or max value was used for each implant | -                                                  | - | 1 mandibular implant removed before PI-induction due to mobility |  |  |
| 61. Schou et al  | 2002 | 1-2 submarginal ligatures + 2-4 supragingival orthodontic elastics tied around implants. + Inoculation of                                                                                                                         | Silk, braided (Ethicon) | 3-0 | Ligatures pushed further down the pocket or changed 1t /m | 14-22 mm to achieve 4-6 mm bone-loss        | Ligatures around all implants                                             | -                                                                                                        | - | -                                         | -             | -                           | -                                     | -                                                                                                   | 420-660 | NA, since ligature period differed among animals                                                                                                       | - | -                                                                                                                           | -                                                  | - | 3 maxillary implants removed during PI induction                 |  |  |

|                   |      |                                                                                                                                                                                                                                                                                                   |                                    |                                         |                                                           |                                     |                                             |                                                  |   |                                                                                                             |                                                                                                     |                                                                                                    |                                                                                                 |   |                                          |                                                                                                                          |    |                                                                        |   |   |                                                                                  |
|-------------------|------|---------------------------------------------------------------------------------------------------------------------------------------------------------------------------------------------------------------------------------------------------------------------------------------------------|------------------------------------|-----------------------------------------|-----------------------------------------------------------|-------------------------------------|---------------------------------------------|--------------------------------------------------|---|-------------------------------------------------------------------------------------------------------------|-----------------------------------------------------------------------------------------------------|----------------------------------------------------------------------------------------------------|-------------------------------------------------------------------------------------------------|---|------------------------------------------|--------------------------------------------------------------------------------------------------------------------------|----|------------------------------------------------------------------------|---|---|----------------------------------------------------------------------------------|
| 62. Schou et al   | 2002 | P. gingivalis 3t /w for 2w + 1w after 1w interruption starting 1m after ligature placement. 1-2 submarginal ligatures + 2-4 supragingival orthodontic elastics tied around implants. + Inoculation of P. gingivalis 3t /w for 2w + 1w after 1w interruption starting 1m after ligature placement. | Silk, braided (Ethicon)            | 3-0                                     | Ligatures pushed further down the pocket or changed 1t /m | 14-22 m to achieve 4-6 mm bone-loss | Ligatures around all implants               | -                                                | - | -                                                                                                           | -                                                                                                   | -                                                                                                  | -                                                                                               | - | 420-660                                  | NA, since ligature period differed among animals                                                                         | -  | -                                                                      | - | - | 3 maxillary implants removed during PI induction                                 |
| 63. Shibli et al  | 2003 | Ligature, submarginal and sutured in the peri-implant mucosa for retention                                                                                                                                                                                                                        | Cotton floss                       | NA                                      | Further ligatures on top of old every 20d                 | 60d                                 | Ligatures around all implants               | -                                                | - | Before ligature placement and at 20d, 40d and 60d after ligature placement. Cultivation of various bacteria | Periapical, long cone technique at ligature placement and 20d, 40d and 60d after ligature placement | -                                                                                                  | -                                                                                               | - | 60                                       | (1) cpTi 2,09±1,70<br>(2) TPS 1,70±1,52<br>(3) HA-coated 1,94±1,59<br>(4) hybrid turned+acid etched 1,62±1,32            | NA | X-ray, periapical. Average of mesial and distal aspect of each implant | - | - | NA                                                                               |
| 64. Shibli et al. | 2003 | Ligature, Cotton floss, submarginal and sutured to gingiva. Followed by a 12m plaque control phase                                                                                                                                                                                                | Cotton floss                       | NA                                      | Further ligatures on top of old every 20d                 | 60d                                 | Ligatures around all implants               | -                                                | - | Before and after treatment                                                                                  | -                                                                                                   | -                                                                                                  | -                                                                                               | - | 60                                       | NA (approx. 40%, not further specified)                                                                                  | -  | -                                                                      | - | - | Only 19 of 36 implants still integrated after ligature pahse + 12m hygiene phase |
| 65. Shibli et al  | 2003 | Ligature, submarginal and sutured in the peri-implant mucosa for retention                                                                                                                                                                                                                        | Cotton floss                       | NA                                      | Further ligatures on top of old every 20d                 | 60d                                 | Ligatures around all implants               | -                                                | - | Before ligature placement and at 20d, 40d and 60d after ligature placement. Cultivation of various bacteria | Periapical, long cone technique at ligature placement and 20d, 40d and 60d after ligature placement | -                                                                                                  | -                                                                                               | - | 60d with ligature + 260d hygiene program | NA since measurement was carried out 12m after ligature removal. Approx 40% bone loss att removal. Not further specified | NA | Histomorpho metrics                                                    | - | - | 17 implants lost after 60d ligature + 12m plaque control phase                   |
| 66. Zechner       | 2003 | Ligature – polyfiber polyester sutures (Mersilene) under 2.0 stainless steel wire ligatures                                                                                                                                                                                                       | Polyester and stainless-steel wire | Mersilene : 2-0<br>Stainless-steel: 2-0 | No                                                        | 4m                                  | No ligatures on contrl side. Continued oral | GI and PPD before ligature placement and monthly | - | -                                                                                                           | IOs monthly from 2-nd stage surgery until end of study                                              | 4 dogs, 23 implants: Ground sections<br>4 dogs, 24 implants: light microscopic immunochemistry and | Active and previous bone resorption. Active bone formation and presence of fluorochrome labels. | - | 120                                      | See fig 4 in paper. Bone loss measured as a radiologic score                                                             | -  | X-ray, concnctional periapical technique. A score from -3 (severe bone | - | - | 1 implant lost. Signs of injury after previous gingival probing around non-      |

|                          |      | under the<br>abutments                                                                               |                   |    |                                                |                                   | hygiene<br>until end<br>of<br>experimen<br>t. |                                                                 |           |   | electron microscopy:<br>Reported elsewhere                                             |                                                                                                                                                                                                                                |   |   |                                  |                                                                                                                                                                                                                                                                                                                                                                       | bone loss) to<br>+3<br>(extensive<br>bone<br>apposition)<br>was used.<br>Conventional<br>X-ray with<br>indiviaual<br>template<br>Digital X-<br>ray with<br>individual<br>template<br>Not specified<br>whether a<br>mean value<br>or max value<br>has been<br>used for each<br>implant<br>Periapical x-<br>rays,<br>standardized<br>with<br>individual<br>bite-blocks.<br>Average of<br>mesial and<br>distal aspects<br>of each<br>implant.<br>Baseline<br>value greater<br>than 0 due to<br>ref. point<br>above the<br>bone crest.<br>Subtraction<br>of baseline<br>value from<br>reseptive<br>measurement<br>values will<br>give amount<br>of bone loss |   |               | ligated<br>implants. (p<br>27) |
|--------------------------|------|------------------------------------------------------------------------------------------------------|-------------------|----|------------------------------------------------|-----------------------------------|-----------------------------------------------|-----------------------------------------------------------------|-----------|---|----------------------------------------------------------------------------------------|--------------------------------------------------------------------------------------------------------------------------------------------------------------------------------------------------------------------------------|---|---|----------------------------------|-----------------------------------------------------------------------------------------------------------------------------------------------------------------------------------------------------------------------------------------------------------------------------------------------------------------------------------------------------------------------|----------------------------------------------------------------------------------------------------------------------------------------------------------------------------------------------------------------------------------------------------------------------------------------------------------------------------------------------------------------------------------------------------------------------------------------------------------------------------------------------------------------------------------------------------------------------------------------------------------------------------------------------------------|---|---------------|--------------------------------|
| 67.<br>Deppe et<br>al    | 2004 | Ligature                                                                                             | Cotton<br>(floss) | NA | No                                             | 3m                                | Ligatures<br>around all<br>implants           | Pressure-froced<br>pocket probing in<br>anesthetized<br>animals | -         | - | Periapical<br>X-rays, long<br>cone<br>technique.<br>Conventional<br>film VS<br>digital | Ground sections – computer<br>assisted histometry                                                                                                                                                                              | - | - | 90                               | Conventional X-ray:<br>2,92±0,51<br>Digital X-ray:<br>2,97±0,44<br>Histology:<br>3,29±0,50                                                                                                                                                                                                                                                                            | -                                                                                                                                                                                                                                                                                                                                                                                                                                                                                                                                                                                                                                                        | - | -             |                                |
| 68.<br>Martins<br>et al  | 2004 | Ligature<br>(submarginal<br>position)<br>followed by 1<br>year of<br>supragingival<br>plaque control | Cotton<br>floss   | NA | Further<br>ligatures at<br>20 day<br>intervals | 60 days or<br>at 40%<br>bone loss | Ligatures<br>around all<br>implants           | Pi, GR, BoP,<br>PPD, CAL,                                       | Periotest | - | IO for<br>vertical and<br>horizontal<br>bone loss                                      | -                                                                                                                                                                                                                              | - | - | Baseline to<br>20d<br>40d<br>60d | Baseline<br>TPS: 2,50 ± 0,61<br>HA: 2,01 ± 0,46<br>AE: 2,36 ± 0,54<br>cpTi: 2,40 ± 0,51<br>20 days<br>TPS: 3,85 ± 0,95<br>HA: 3,62 ± 0,29<br>AE: 3,64 ± 0,17<br>cpTi: 4,12 ± 0,72<br>40 days<br>TPS: 4,62 ± 0,90<br>HA: 4,65 ± 0,84<br>AE: 5,19 ± 0,51<br>cpTi: 5,20 ± 0,71<br>60 days<br>TPS: 6,00 ± 0,70<br>HA: 6,22 ± 0,50<br>AE: 6,06 ± 0,27<br>cpTi: 6,32 ± 0,00 | Available in paper                                                                                                                                                                                                                                                                                                                                                                                                                                                                                                                                                                                                                                       | - | -             | None reported                  |
| 69.<br>Persson<br>et al. | 2004 | Ligature                                                                                             | Cotton            | NA | -                                              | 3m                                | -                                             | -                                                               | -         | - | IO                                                                                     | BIC (%), IC-PM (mm), PM-<br>aJE (mm), aJE-CBI (mm),<br>BC-BD (mm), re-<br>osseointegration (mm), re-<br>osseointegration (% of bone<br>defect), defect area (mm²),<br>bone fill (mm²), bone fill<br>(%), regenerated bone (%), | - | - | 90                               | Measurements of re-<br>osseointegration, not<br>bone loss                                                                                                                                                                                                                                                                                                             | -                                                                                                                                                                                                                                                                                                                                                                                                                                                                                                                                                                                                                                                        | - | None reported |                                |

|                           |      |                                                                                           |                 |    |                                                |                                                             |                                     |                                    |                            |   |                                                                                                         |                                                                                                        |                                                                                                   |   |                                          |                                                                                                                                                                                                                                                                                                                                                                               |                    |                                                                                                                                                                                                                                                                                                                                                                 |   |   |                                                                                                                  |
|---------------------------|------|-------------------------------------------------------------------------------------------|-----------------|----|------------------------------------------------|-------------------------------------------------------------|-------------------------------------|------------------------------------|----------------------------|---|---------------------------------------------------------------------------------------------------------|--------------------------------------------------------------------------------------------------------|---------------------------------------------------------------------------------------------------|---|------------------------------------------|-------------------------------------------------------------------------------------------------------------------------------------------------------------------------------------------------------------------------------------------------------------------------------------------------------------------------------------------------------------------------------|--------------------|-----------------------------------------------------------------------------------------------------------------------------------------------------------------------------------------------------------------------------------------------------------------------------------------------------------------------------------------------------------------|---|---|------------------------------------------------------------------------------------------------------------------|
| 70.<br>Zitzmann<br>et al  | 2004 | Ligature,<br>submarginal<br>+ 12 m<br>spontaneous<br>plaque<br>accumulation               | Cotton          | NA | Every 2w                                       | 2m (+12<br>m<br>spontaneo<br>us plaque<br>accumulat<br>ion) | Ligatures<br>around all<br>implants |                                    |                            |   | IO at<br>baseline,<br>ligature<br>removal<br>(2m) and<br>after<br>spontaneous<br>accumulatio<br>n (14m) | Ground sections of resin<br>blocks – various<br>measurements of peri-<br>implant bone and soft tissues | ICT, plaque and pus areas measured                                                                | - | 60+365                                   | Bone loss after ligature<br>removal:<br><br>2,58±0,39 mm<br><br>Additional bone loss<br>after 12m accumulation:<br><br>1,02±1,62                                                                                                                                                                                                                                              | -                  | X-ray,<br>periapical,<br>mean of<br>mesial and<br>distal aspect                                                                                                                                                                                                                                                                                                 | - | - | 1 implant lost<br>during ligature<br>phase. 2<br>implants lost<br>during<br>spontaneous<br>accumulation<br>phase |
| 71.<br>Hayek et<br>al     | 2005 | Ligature                                                                                  | NA              | NA | No                                             | 120d +<br>120d<br>additional<br>plaque<br>accumulat<br>ion  | Ligatures<br>around all<br>implants | Clinical status and<br>radiographs | -                          | - | -                                                                                                       | One implant in 1 animal<br>removed and investigated<br>with SEM to validate implant<br>contamination   | One implant in 1 animal removed and<br>investigated with SEM to validate<br>implant contamination | - | 120+120                                  | -                                                                                                                                                                                                                                                                                                                                                                             | -                  | -                                                                                                                                                                                                                                                                                                                                                               | - | - | 1                                                                                                                |
| 72.<br>Martins<br>et al   | 2005 | Ligature<br>(Submarginal<br>position) + 1 year<br>passive phase<br>with daily<br>cleaning | Cotton<br>floss | NA | Further<br>ligatures at<br>20 day<br>intervals | 60 days                                                     | Ligatures<br>around all<br>implants | PD, CAL                            | Periotest                  | - | IO for<br>vertical and<br>horizontal<br>bone loss                                                       | -                                                                                                      | -                                                                                                 | - | Baseline to<br>20d<br>40d<br>60d<br>425d | Baseline<br>cpTi: 2,32 ± 0,53<br>TPS: 2,50 ± 0,61<br>HA: 2,01 ± 0,46<br>Acid: 2,36 ± 0,54<br>20 days<br>cpTI: 4,12 ± 0,72<br>TPS: 3,85 ± 0,95<br>HA: 3,62 ± 0,29<br>Acid: 3,64 ± 0,17<br>40 days<br>cpTI: 5,20 ± 0,71<br>TPS: 4,61 ± 0,90<br>HA: 4,65 ± 0,84<br>Acid: 5,19 ± 0,51<br>60 days<br>cpTI: 6,32 ± 0,33<br>TPS: 6,00 ± 0,70<br>HA: 6,22 ± 0,50<br>Acid: 6,06 ± 0,27 | Available in paper | Periapical x-<br>rays,<br>standardized<br>with<br>individual<br>bite-blocks.<br>Average of<br>mesial and<br>distal aspects<br>of each<br>implant.<br>Baseline<br>value greater<br>than 0 due to<br>ref. point<br>above the<br>bone crest.<br>Subtraction<br>of baseline<br>value from<br>reseptive<br>measurement<br>values will<br>give amount<br>of bone loss | - | - | None during<br>ligature phase,<br>17 during the<br>1 year follow<br>up                                           |
| 73.<br>Sennerby<br>et al. | 2005 | Ligature,<br>submarginal                                                                  | Cotton          | NA | Every 3w                                       | 3m                                                          | Ligatures<br>around all<br>implants | -                                  | Resonanc<br>e<br>frequency | - | Standardize<br>d IOs with<br>individualiz                                                               | Re-osseointegration after<br>treatment measured                                                        | -                                                                                                 |   | 90                                       | SLA group<br>3,1±1,2<br>U group                                                                                                                                                                                                                                                                                                                                               | -                  | X-ray,<br>periapical,<br>standardized                                                                                                                                                                                                                                                                                                                           | - | - | NA                                                                                                               |

|                            |      |                                                                                                                                                                                                                                       |        |    |                                                                    |                                                                                   |                                                            |                                                                                                                         | analysis<br>(RFA) at<br>baseline,<br>after<br>ligature<br>phase and<br>after<br>treatment |   |                      |                                                                                                                                                                                                                                                       |                                                                                                                                          |   |         | 3,4±0,3                                                                                                                                                                                                                                                                                                                           |    | with<br>individual<br>film holder                                                                    |                                                                                                    |    |                                                                                    |  |
|----------------------------|------|---------------------------------------------------------------------------------------------------------------------------------------------------------------------------------------------------------------------------------------|--------|----|--------------------------------------------------------------------|-----------------------------------------------------------------------------------|------------------------------------------------------------|-------------------------------------------------------------------------------------------------------------------------|-------------------------------------------------------------------------------------------|---|----------------------|-------------------------------------------------------------------------------------------------------------------------------------------------------------------------------------------------------------------------------------------------------|------------------------------------------------------------------------------------------------------------------------------------------|---|---------|-----------------------------------------------------------------------------------------------------------------------------------------------------------------------------------------------------------------------------------------------------------------------------------------------------------------------------------|----|------------------------------------------------------------------------------------------------------|----------------------------------------------------------------------------------------------------|----|------------------------------------------------------------------------------------|--|
| 74.<br>Stübinger<br>et al  | 2005 | Ligature                                                                                                                                                                                                                              | Cotton | NA | No                                                                 | 3m                                                                                | Ligatures<br>around all<br>implants                        | -                                                                                                                       | -                                                                                         | - | -                    | -                                                                                                                                                                                                                                                     | -                                                                                                                                        | - | 90      | Noticable<br>circumferential peri-<br>implant bone defects.<br>Not further specified                                                                                                                                                                                                                                              | NA | NA                                                                                                   | NA                                                                                                 | NA | NA                                                                                 |  |
| 75. Trejo<br>et al         | 2005 | Ligature 1w +<br>plaque<br>accumulation 2w<br>+ ligature 3w +<br>2m with different<br>hygiene<br>protocols:<br>(a) mechanical<br>cleaning<br>(b) mechanical<br>cleaning + 0,2%<br>CHX gel + 0,12%<br>CHX irrigation<br>(c) No hygiene | Silk   | NA | Ligature<br>1w +<br>plaque<br>accumulati<br>on 2w +<br>ligature 3w | Ligature<br>1w +<br>plaque<br>accumulat<br>ion 2w +<br>ligature<br>3w             | Ligatures<br>around all<br>implants                        | PI, GI, PPD,<br>CAL, recession,<br>BoP<br>PPD, CAL,<br>recession from 6<br>ponts around the<br>implant to nearest<br>mm | -                                                                                         | - | -                    | Saw sectioned plastic<br>embedded specimens                                                                                                                                                                                                           | Bone level and various other<br>measurements                                                                                             | - | 7+14+21 | NA, only CAL measures<br>provided                                                                                                                                                                                                                                                                                                 | -  | -                                                                                                    | -                                                                                                  | -  | 1 implant not<br>inserted due to<br>lack of<br>stability at<br>implant<br>surgery. |  |
| 76.<br>Watzak<br>et al     | 2005 | Spontaneous<br>plaque<br>accumulation                                                                                                                                                                                                 | -      | -  | -                                                                  | 18m                                                                               | 3 implant<br>systems,<br>all treated<br>in the<br>same way | All implants had<br>signs of peri-<br>implant<br>inflammation after<br>18m                                              | -                                                                                         | - | -                    | Ground sections – severe<br>inflammation with<br>comparatively little crestal<br>bone loss around all<br>implants. Lymphocytes,<br>plasmacells and<br>macrophages dominated<br>inflammatory infiltrates.<br>Minor difference between<br>implant types | Mucosal margin<br>apical extension of sulcus and<br>junctional epithelium,<br>implant-abutment connection, first<br>bone-implant contact | - | 540     | Maxilla:<br>All implant types: 0,9<br>mm (0,5/1,6 CI)<br>CpTi screw: 0,9 (0,5/1,6)<br>TPS cylinder: 0,9<br>(0,5/1,5)<br>GBAE screw: 0,9<br>(0,5/1,6)<br>Mandible:<br>All implant types:<br>0,6 mm (0,4/0,9) to 0,8<br>mm (0,5/1,2)<br>CpTi screw: 0,8 (0,5/1,2)<br>TPS cylinder: 0,6<br>(0,4/0,9)<br>GBAE screw: 0,7<br>(0,5/1,6) | -  | Histo - each<br>implant<br>measured on<br>3 sites:<br>buccal and<br>lingual +<br>mesial or<br>distal | -                                                                                                  | -  | No implants<br>and no<br>suprastructure<br>s lost                                  |  |
| 77.<br>Berglund<br>h et al | 2006 | Ligature (sub-<br>marginal<br>position)<br>+spontaneous<br>accumulation                                                                                                                                                               | Cotton | NA | Every 2<br>weeks                                                   | 4m with<br>ligature<br>and 5m<br>with<br>additional<br>plaque<br>accumulat<br>ion | -                                                          | -                                                                                                                       | -                                                                                         | - | Periapical<br>X-rays | LM analysis of ground<br>sections. Greater amount of<br>bone loss at the SLA sites<br>than at Polished sites. (7,34<br>vs 5,95 mm)                                                                                                                    | -                                                                                                                                        | - | 120     | SLA: 2,51± 0,55<br>Polished: 2,27±1,05                                                                                                                                                                                                                                                                                            |    | X-ray<br>periapical,<br>customized<br>film holder.<br>Mean values<br>for each<br>variable            | Additional loss 5<br>months after<br>ligature removal:<br>SLA: 1,12±1,07<br>Polished:<br>0,07±0,72 | -  | None reported                                                                      |  |

|                      |      |                                                                                                                    |                |    |                                           |                                                |                                |                                                            |                                                                     |   |                                          |                                                                                                   |                                                                          |   |                  |                                                                                                                                                                                                                                                                                                |                                                                                                                                                                                                                                                                                       |                                                                                                                                 |   |                                                                    |                                                                                                                                |
|----------------------|------|--------------------------------------------------------------------------------------------------------------------|----------------|----|-------------------------------------------|------------------------------------------------|--------------------------------|------------------------------------------------------------|---------------------------------------------------------------------|---|------------------------------------------|---------------------------------------------------------------------------------------------------|--------------------------------------------------------------------------|---|------------------|------------------------------------------------------------------------------------------------------------------------------------------------------------------------------------------------------------------------------------------------------------------------------------------------|---------------------------------------------------------------------------------------------------------------------------------------------------------------------------------------------------------------------------------------------------------------------------------------|---------------------------------------------------------------------------------------------------------------------------------|---|--------------------------------------------------------------------|--------------------------------------------------------------------------------------------------------------------------------|
| 78. Kozlovsk y et al | 2006 | (A) No ligature, no overload<br>(B) No ligature, overload<br>(C) Ligature no overload<br>(D) Ligature and overload | Cotton floss   | NA | Replaced every 4w                         | 12m                                            | Brushing with 2% CHX 3 times/w | PI, GI, PPD monthly                                        | Periotest monthly                                                   | - | Periapical radiographs every 3m          | Ground sections – BIC, Vertical bone level from implant top and bony crest, horizontal bone level | -                                                                        | - | 365              | Buccal implant margin to bottom of bone defect:<br>(A) $0,37 \pm 0,54$<br>(B) $0,12 \pm 0,61$<br>(C) $-2,53 \pm 0,77$<br>(D) $3,08 \pm 0,89$<br>Lingual implant margin to bottom of bone defect:<br>(A) $0,80 \pm 0,68$<br>(B) $0,50 \pm 0,64$<br>(C) $-2,50 \pm 0,65$<br>(D) $-3,28 \pm 0,31$ | Buccal intrabony defect horizontal distance:<br>(A) $0,39 \pm 0,23$<br>(B) $0,41 \pm 0,34$<br>(C) $1,20 \pm 0,35$<br>(D) $1,69 \pm 0,72$<br>Lingual intrabony defect horizontal distance:<br>(A) $0,72 \pm 0,57$<br>(B) $0,53 \pm 0,19$<br>(C) $2,20 \pm 0,07$<br>(D) $2,35 \pm 0,33$ | Histo. Bucco-lingual sections, both measurements reported separately                                                            | - | Registered in vertical and horizontal bone loss boxes respectively | All implants stable throughout the study (-0,76 mean periotest value)                                                          |
| 79. Schwarz et al    | 2006 | Ligature, submarginal                                                                                              | Cotton         | NA | Every 3w                                  | At approximately.. 40% bone loss (around 3m)   | Ligatures around all implants  | BOP, PPD, Gingival recession, CAL at 5 aspects per implant | -                                                                   | - | Periapical before and 3m after treatment | Ground sections. New bone after surgery                                                           | Various measurements on both soft and hard tissues                       | - | NA               | NA, ligatures removed at approx 40% bone loss at approx 3m                                                                                                                                                                                                                                     | -                                                                                                                                                                                                                                                                                     | -                                                                                                                               | - | -                                                                  | No losses                                                                                                                      |
| 80. Shibli et al     | 2006 | Ligature, submarginal and sutured in the peri-implant mucosa for retention                                         | Cotton floss   | NA | Further ligatures on top of old every 20d | 90d                                            | Ligatures around all implants  | -                                                          | -                                                                   | - | -                                        | -                                                                                                 | -                                                                        | - | 90               | (1) Turned $2,43 \pm 0,96$<br>(2) TPS $4,55 \pm 1,77$<br>(3) Hybride $2,60 \pm 0,96$<br>(4) Sandblasted with Ti-oxide $2,8 \pm 0,41$<br>Distribution, configuration and size of defects in table 2 of paper                                                                                    | -                                                                                                                                                                                                                                                                                     | Intraoperative measurement with periodontal probe, after reflection of soft tissues. Mean value of 4 sites around each implant. | - | -                                                                  | 2 implants in 2 animals lost during ligature phase:<br>(1) cpTi (Turned) test group<br>(4) (Sanblasted Ti-oxide) control group |
| 81. Schwarz et al    | 2007 | Ligature, submarginal vs naturally occurring PI in humans                                                          | Cotton         | NA | Every 3w                                  | At approximately.. 30% bone loss (around 3m)   | Ligatures around all implants  | Measurements of bone defect during flap surgery            | -                                                                   | - | -                                        | -                                                                                                 | -                                                                        | - | Approximately 90 | 79% configuration between natural vs experimental PI. Generally a combined supracrestal and intrabony defect.                                                                                                                                                                                  | Distribution, configuration and size of defects in table 2 of paper                                                                                                                                                                                                                   | Open flap surgery                                                                                                               | - | -                                                                  |                                                                                                                                |
| 82. Takasaki et al   | 2007 | Man made buccal defect with silicone later exchanged for stainless steel mesh + ligature                           | Silk           | NA | No                                        | Defect + silicone 3m. Steel mesh + ligature 4w | Same for all implants          |                                                            | PCR – samples from ligature at time of removal for various bacteria |   | -                                        | -                                                                                                 | Area of new bone, % of new bone height, 5 of new bone to implant contact | - | 90+28            | Not relevant since defect was partly man made                                                                                                                                                                                                                                                  | Not relevant since defect was partly man made                                                                                                                                                                                                                                         | -                                                                                                                               | - | -                                                                  | NA                                                                                                                             |
| 83. You et al        | 2007 | Ligature around the implants                                                                                       | Gauze and wire | NA | NA                                        | 2-4m / animal due to different                 | Ligatures around all implans   | -                                                          | -                                                                   | - | IO                                       | -                                                                                                 | -                                                                        | - | 60-120           | 4-6 mm bone loss                                                                                                                                                                                                                                                                               | -                                                                                                                                                                                                                                                                                     | IO radiographs                                                                                                                  | - | -                                                                  | -                                                                                                                              |

|                          |      |                                                                         |                                                   |    |                         |                                                                                                                                                     |                                     |           |                                           |   |                                                                                                                                                                     |                                                                                                                                                                                                                                                                                  |   |   |    |    |                                                                                                                                                                                                            |                     |                                                                                                                     |                                                                                                                                 |                                                                 |                                                                                       |
|--------------------------|------|-------------------------------------------------------------------------|---------------------------------------------------|----|-------------------------|-----------------------------------------------------------------------------------------------------------------------------------------------------|-------------------------------------|-----------|-------------------------------------------|---|---------------------------------------------------------------------------------------------------------------------------------------------------------------------|----------------------------------------------------------------------------------------------------------------------------------------------------------------------------------------------------------------------------------------------------------------------------------|---|---|----|----|------------------------------------------------------------------------------------------------------------------------------------------------------------------------------------------------------------|---------------------|---------------------------------------------------------------------------------------------------------------------|---------------------------------------------------------------------------------------------------------------------------------|-----------------------------------------------------------------|---------------------------------------------------------------------------------------|
| 84.<br>Albouy<br>et al   | 2008 | Ligature (sub-<br>marginal<br>position)<br>+spontaneous<br>accumulation | Cotton                                            | NA | At weeks 3,<br>6, and 9 | rates of<br>bone loss<br>12w (40-<br>50%<br>boneloss)<br>Plaque<br>accumulat<br>ion<br>continued<br>for 24<br>weeks<br>after<br>ligature<br>removal | -                                   |           |                                           |   |                                                                                                                                                                     | IO before<br>ligature<br>placement.<br>At ligature<br>removal. At<br>6, 14 and 24<br>weeks after<br>ligature<br>removal.                                                                                                                                                         | - | - | -  | 84 | Baseline at ligature<br>placement. Bone loss at<br>ligature removal:<br>A: 3.53 ± 1,04<br>B: 4.10±0,63<br>C: 4,69±0,52<br>D: 3,58±0,37                                                                     | -                   | X-ray<br>peripical,<br>customized<br>holder. Mean<br>value of<br>mesial and<br>distal aspect<br>of each<br>implant. | ADDITIONAL<br>bone loss 24 weeks<br>after ligature<br>removal:<br>A: 1,84±1,41<br>B: 1,72±1,25<br>C: 1,55±0,68<br>D: 2,78± 1,91 | -                                                               | A: 1 implant<br>lost at week<br>26.<br>D: 1 lost at<br>week 35.                       |
| 85.<br>Martines<br>et al | 2008 | Ligature,<br>submarginal<br>position                                    | Cotton,<br>(GN<br>Injecta,<br>Diadema,<br>Brazil) | NA | No                      | 90d                                                                                                                                                 | Ligatures<br>around all<br>implants | CAL, PPD, | Periotestu<br>ntil same<br>value<br>twice | - | -                                                                                                                                                                   | -                                                                                                                                                                                                                                                                                | - | - | -  | 90 | Only tables – no specific<br>figures. More bone loss<br>around Straumann<br>implants after 90d. Main<br>loss of CAL during the<br>first 30 days of ligature<br>phase. Mobility<br>increased in both groups | -                   | -                                                                                                                   | -                                                                                                                               | -                                                               | 3 Brånemark<br>and 3<br>Straumann<br>implants lost<br>during implant<br>healing phase |
| 86.<br>Albouy<br>et al   | 2009 | Ligature (sub-<br>marginal<br>position)<br>+spontaneous<br>accumulation | Cotton                                            | NA | At weeks 3,<br>6 and 9  | 12w (40-<br>50%<br>boneloss)<br>Plaque<br>accumulat<br>ion<br>continued<br>for 24<br>weeks<br>after<br>ligature<br>removal                          | -                                   | -         | -                                         | - | LM analysis of ground<br>sections. Localisation,<br>vertical extension and area of<br>ICT. Marginal bone position<br>with abutment/fixture<br>junction as reference | Discussed in general terms                                                                                                                                                                                                                                                       | - | - | 84 | NA | -                                                                                                                                                                                                          | Light<br>microscopy | -                                                                                                                   | -                                                                                                                               | A: 1 implant<br>lost at week<br>26.<br>D: 1 lost at<br>week 35. |                                                                                       |
| 87. Parlar<br>et al.     | 2009 | Ligature                                                                | Cotton                                            | NA | 1m                      | 3m                                                                                                                                                  | -                                   | -         | -                                         | - | IO                                                                                                                                                                  | (1) linear measurement from<br>the coronal-most BIC level<br>to the base of the implant<br>body; (2) linear measurement<br>from the alveolar bone crest<br>level to the base of the<br>implant body; and (3)<br>percentage of BIC on the<br>surface of the basal implant<br>body | - | - | -  | 90 | -                                                                                                                                                                                                          | Histo               | -                                                                                                                   | -                                                                                                                               | None reported                                                   |                                                                                       |
| 88.<br>Albouy<br>et al   | 2011 | Ligature (sub-<br>marginal<br>position)                                 | Cotton                                            | NA | At weeks 3,<br>6 and 9  | 12w (40-<br>50%<br>boneloss)                                                                                                                        | -                                   | -         | -                                         | - | -                                                                                                                                                                   | -                                                                                                                                                                                                                                                                                | - | - | -  | 84 | 3.87 (12 weeks)                                                                                                                                                                                            | -                   | X-ray<br>peripical,<br>customized<br>holder. Mean<br>value of<br>mesial and<br>distal aspect<br>of each<br>implant. | -                                                                                                                               | -                                                               | D: 1 lost 2<br>months after<br>placement.                                             |



|                       |      |                                                                                                        |        |     |                   |                                                                                                    |                                         |                                                         |   |   |                                               |                                                                                                                                                                                                                       |                                                    |                                   |     |                                                                                                                             |            |                                                                                                                |                                                                                                     |                                            |                                                                                                  |
|-----------------------|------|--------------------------------------------------------------------------------------------------------|--------|-----|-------------------|----------------------------------------------------------------------------------------------------|-----------------------------------------|---------------------------------------------------------|---|---|-----------------------------------------------|-----------------------------------------------------------------------------------------------------------------------------------------------------------------------------------------------------------------------|----------------------------------------------------|-----------------------------------|-----|-----------------------------------------------------------------------------------------------------------------------------|------------|----------------------------------------------------------------------------------------------------------------|-----------------------------------------------------------------------------------------------------|--------------------------------------------|--------------------------------------------------------------------------------------------------|
| 89. Levin et al       | 2011 | Ligature retained with cyanoacrylate around all implants                                               | Silk   | NA  | No                | 45d                                                                                                | None. Ligatures around all implants     | -                                                       | - | - | -                                             | -                                                                                                                                                                                                                     | -                                                  | Implants removed and reimplanted. | 45  | -                                                                                                                           | -          | -                                                                                                              | -                                                                                                   | -                                          | Removed implants reimplanted at fresh sites, wider implants at old sites. 10 successful, 6 lost. |
| 90. Schwarz et al     | 2011 | Ligature – submarginal technique                                                                       | Cotton | 4-0 | Every 4w.         | 4 months approx. (until 60% bone loss)                                                             | Ligatures around all implants           | Intra-operative assessment of defects during PI surgery | - | - | CBCT                                          | Ground sections – Implant shoulder to bottom of bone defect and the most coronal level of bone in contact with the implant surface. Percentage linear histological bone fill calculated on buccal and lingual aspect. | -                                                  | -                                 | NA  | NA since ligature period was not specified                                                                                  | In table 1 | Intra-operative measurement                                                                                    | -                                                                                                   | -                                          | No losses                                                                                        |
| 91. Albouy et al      | 2012 | Ligature (sub-marginal position) +spontaneous accumulation                                             | Cotton | NA  | Every 3 weeks     | 10w (12 according to Fig 1 text) Plaque accumulation continued for 26 weeks after ligature removal | -                                       | -                                                       | - | - | IO periapical X-rays                          | LM analysis of ground sections. Localisation, vertical extension and area of ICT. Marginal bone position with abutment/fixture junction as reference                                                                  | -                                                  | -                                 | 70  | Marginal bone loss from IO X-rays: At ligature removal (10 weeks): A: 3,00 ± 0,44 B: 3,47 ± 0,45                            | -          | X-ray peripical, customized holder. Mean value of mesial and distal aspect of each implant.                    | Additional bone loss 16 weeks after ligature removal: A: 0,03 ± 0,50 B: 1,47 ± 0,65                 | -                                          | None reported                                                                                    |
| 92. Golubovic et al   | 2012 | Ligature (submarginal position) + failed regenerative surgery                                          | Cotton | 4-0 | Yes, every 4w     | 4m                                                                                                 | -Ligatures around all implants          | -                                                       | - | - | CBCT                                          | Ground sections.                                                                                                                                                                                                      | -                                                  | -                                 | 120 | NA                                                                                                                          | -          | -                                                                                                              | -                                                                                                   | -                                          | -                                                                                                |
| 93. López-Piriz et al | 2012 | Ligatures, submarginal technique                                                                       | Cotton | NA  | Replaced every 3w | 3m                                                                                                 | Ligatures around all implants           | Assessment of plaque and inflammation weekly            | - | - | Periapical radiographs                        | -                                                                                                                                                                                                                     | -                                                  | -                                 | 90  | (Reduced variable) test<br>Distal test 1,33±1,56<br>Distal ctrl 3,47±3,01<br>Mesial test 2,04±3,72<br>Mesial ctrl 3,73±4,55 | -          | "X-rays, periapical with holder that allowed easy and predictable alignment. Mean of mesial and distal aspect" | -                                                                                                   | 1 case implant lost at abutment connection |                                                                                                  |
| 94. Becker et al      | 2013 | Ligature                                                                                               | Vicryl | 4-0 | No                | 9w                                                                                                 | Same, no ligature.                      | -                                                       | - | - | Micro-CT                                      | LM analysis of ground sections                                                                                                                                                                                        | -                                                  | -                                 | 63  | NA, only vertical measurements provided                                                                                     | -          | Micro-CT                                                                                                       | -                                                                                                   | Bone defect size 0,15±0,015                | 2 from the ligature group; 1 from the control group                                              |
| 95. Carcuac et al     | 2013 | Ligature (Sub-marginal position) at implants and 2 <sup>nd</sup> , 3 <sup>rd</sup> and 4 <sup>th</sup> | Cotton | NA  | At weeks 3 and 6  | 10w + 26w continued plaque accumulation                                                            | Ligatures around all implants and teeth | -                                                       | - | - | Periapical X-rays with customized film-holder | LM analysis of groundsections,                                                                                                                                                                                        | Immunohistochemical analysis of paraffin sections. | -                                 | 70  | "Turned: 2,69±0,57<br>Ti-Unite 3,14±0,69                                                                                    | -          | X-ray peripical, customized holder. Mean value of mesial and                                                   | Additional loss 26 weeks after ligature removal: Teeth: 0,00±0,53<br>A: -0,02±0,66<br>B: -1,34±1,19 | -                                          | None reported                                                                                    |

[illegible]

|                       |      |                                                                   |              |     |                                                                     |                                                                                     |                                            |                                                                                                       |    |                                                                                                    |                                                                                  |                                         |                                                                                                                                                                                 |                                                                          |        |                                                                                                                                                                         |                                               |                                                                                                                                                                                                                                                                                                               |   |   |                                                              |
|-----------------------|------|-------------------------------------------------------------------|--------------|-----|---------------------------------------------------------------------|-------------------------------------------------------------------------------------|--------------------------------------------|-------------------------------------------------------------------------------------------------------|----|----------------------------------------------------------------------------------------------------|----------------------------------------------------------------------------------|-----------------------------------------|---------------------------------------------------------------------------------------------------------------------------------------------------------------------------------|--------------------------------------------------------------------------|--------|-------------------------------------------------------------------------------------------------------------------------------------------------------------------------|-----------------------------------------------|---------------------------------------------------------------------------------------------------------------------------------------------------------------------------------------------------------------------------------------------------------------------------------------------------------------|---|---|--------------------------------------------------------------|
| 102.<br>Pârvu et al.  | 2014 | Ligature                                                          | Cotton       | NA  | -                                                                   | 3w                                                                                  | -                                          | -                                                                                                     | -  | -                                                                                                  | IO                                                                               | -                                       | Counting of neutrophils and mononuclear cells                                                                                                                                   | Blood samples, fractal analysis, serum nitro-oxidative stress evaluation | 21     | NA. Bone loss not specifically measured                                                                                                                                 | -                                             | -                                                                                                                                                                                                                                                                                                             | - | - | None reported                                                |
| 103.<br>Battula et al | 2015 | Ligature (Sub-marginal position, placed during abutment surgery.) | Silk         | 3-0 | No                                                                  | 12w and 26w                                                                         | Daily brushing and rinsing with 0,12% CHX. | PPD                                                                                                   | -  | -                                                                                                  | Periapical X-ray at implant installation.                                        | Blinded LM analysis of ground sections. | Acute inflammation, chronic inflammation and fibrosis evaluated on a 5-point scale. 0=not present, 1=minimal, 2=mild, 3=moderate, 4=marked (according to Loe and Silness index) | -                                                                        | 84+182 | Measurements in pocket depth, not in bone loss                                                                                                                          | -                                             | Clinical                                                                                                                                                                                                                                                                                                      | - | - | None reported                                                |
| 104.<br>Carcuac et al | 2015 | Ligature (sub-marginal position)                                  | Cotton       | NA  | At weeks 3 and 6.                                                   | 9w                                                                                  | Ligatures around all implants              | -                                                                                                     | -  | 4 weeks after ligature removal (hygiene reinstated at ligature removal) DNA-DNA hybridization tech | Periapical X-rays                                                                | -                                       | -                                                                                                                                                                               | -                                                                        | 63     | TiOblast: 3,58±0,76<br>OsseoSpeed: 3,72±0,65<br>At-I: 3,73±0,47<br>TiUnite: 3,57±0,63                                                                                   | -                                             | X-ray peripical, customized holder. Mean value of mesial and distal aspect of each implant. X-rays, periapical with customized film holder. Mean value of mesial and distal aspect of each implant. Clinical measurement of 4 surfaces. Not specified whehter a mean- or max value was used for each implant. | - | - | None during the breakdown phase                              |
| 105.<br>Fickl et al   | 2015 | Ligature (submarginal position)                                   | Silk         | NA  | Additional ligatures every 2w until totally 4 ligatures per implant | 8w followe by 3w of daily hygiene accordnig to table one (2), plaque control method | Ligatures around all implants              | PPD. BoP. Mucosal recession. Depth and width of intrasurgical marginal bone defect to nearest 0,5 mm. | NA | -                                                                                                  | Periapical with customized film-holder. Mesial and distal bone defects measured. | -                                       | -                                                                                                                                                                               | -                                                                        | 56     | Table 1, page e665. Only specifies difference between implants. Radiographic bone level and intra-surgical defect depth displayed in fig. 6 but no numbers are provided | -                                             | X-rays periapical with                                                                                                                                                                                                                                                                                        | - | - | One implant (S) mobile and removed before ligature placement |
| 106.<br>Huang et al   | 2015 | Ligature (submarginal position)                                   | Cotton floss | NA  | No                                                                  | 12w                                                                                 | Ligatures around all implants              | CAL, PPD, PI, BoP at baseline 6w and 12w                                                              | -  | -                                                                                                  | Standardize d periapical radiographs                                             | -                                       | -                                                                                                                                                                               | -                                                                        | 84     | "0,39±0.39 (crestal screwed-in)                                                                                                                                         | Crestal implants: (A) 0,59±0,55 (B) 0,55±0,45 | X-rays periapical with                                                                                                                                                                                                                                                                                        | - | - | None                                                         |

|                        |       |                                                                       |                                      |                |                                                 |                                            |                               |   |   |                        |                                               |                                                                                                                                                                                                                                                                                                                                                                                                                                                                                                                                                                                                                         |   |          |       |                                                                                                                                                                                                                                                                                                                                                                                                                                                                      |                                                        |                                                                                                              |   |              |                              |
|------------------------|-------|-----------------------------------------------------------------------|--------------------------------------|----------------|-------------------------------------------------|--------------------------------------------|-------------------------------|---|---|------------------------|-----------------------------------------------|-------------------------------------------------------------------------------------------------------------------------------------------------------------------------------------------------------------------------------------------------------------------------------------------------------------------------------------------------------------------------------------------------------------------------------------------------------------------------------------------------------------------------------------------------------------------------------------------------------------------------|---|----------|-------|----------------------------------------------------------------------------------------------------------------------------------------------------------------------------------------------------------------------------------------------------------------------------------------------------------------------------------------------------------------------------------------------------------------------------------------------------------------------|--------------------------------------------------------|--------------------------------------------------------------------------------------------------------------|---|--------------|------------------------------|
| 107. Ikumi et al       | 2015  | Static compressive load at 0-180 MPa                                  | -                                    | -              | -                                               | 7d                                         | -                             | - | - | -                      | -                                             | Ground sections                                                                                                                                                                                                                                                                                                                                                                                                                                                                                                                                                                                                         | - | -        | 7     | 0,24±0,36 (crestal tapped-in)<br>0.97±0.85 (subcrestal screwed-in)<br>0.73±0.47 (subcrestal tapped-in)<br><br>No bone loss in any if the implants                                                                                                                                                                                                                                                                                                                    | Subcrestal implants:<br>(A) 0,84±0,91<br>(B) 0,92±0,57 | templates, average of mesial and distal value for each implant<br><br>Light microscopy                       | - | No bone loss | None                         |
| 108. López-Piriz et al | 2015  | 12w spontaneous accumulation followed by 10w of submarginal ligatures | Cotton                               | NA             | Replaced every 3w                               | 10w (preceded by 12 w spont. Accumulation) | Same procedure on both sides. | - | - | CFU/ml and cultivation | Periapical radiographs                        | -                                                                                                                                                                                                                                                                                                                                                                                                                                                                                                                                                                                                                       | - | -        | 84+70 | See fig 8<br>After spontaneous accumulation (84d):<br>Control 0,5±0,44<br>G3 0,45±0,39<br>ZnO35 0,8±0,77<br>G1n-Ag 1,2±0,47<br>Total bone loss after ligature (84d+70d):<br>Control 2,21 ± 0,46<br>G3 1,64±0,43<br>ZnO35 1,42±0,40<br>G1n-Ag 1,45±0,56<br>Bone loss during ligature phase<br>total bone loss - spontaneous accumulation loss<br>Turned: 2.4 ± 1.0 (XR)<br>2.7±1.2 (H) SA/HA: 2.7 ± 0.6 (XR) 3.5±1.2 (H) SA: 2.3 ± 1.0 (XR)<br>3.2±1.4 (H) (23 weeks) | -                                                      | X-rays, periapical with holder that allowed easy and predictable alignment. Mean of mesial and distal aspect | - | -            | 1 G1n-Ag lost at sec surgery |
| 109. Namgoong et al.   | 2015  | Ligature                                                              | Stainless steel                      | NA             | NP                                              | 23w                                        | -                             | - | - | -                      | IO (5, 8, 12, 18, 23w), after GBR (4, 8, 12w) | PPDD, BRH, BRA, BIC                                                                                                                                                                                                                                                                                                                                                                                                                                                                                                                                                                                                     | - | -        | 161   | NA, but approx. 40% of bone was lost after 120 days.                                                                                                                                                                                                                                                                                                                                                                                                                 | -                                                      | IO X-ray and histometric analysis                                                                            | - | -            | None reported                |
| 110. Park et al.       | 2015a | Ligature                                                              | Orthodontic ligature wire + 3-0 silk | 0.254 mm + 3-0 | Additional ligature every 4 weeks (no exchange) | 4m                                         | -                             | - | - | -                      | IO                                            | (a) linear measurement from the alveolar crest to the apex of the implant, (b) linear measurement from the most coronal bone-to-implant contact (first BIC) level to the apex of the implant, (c) linear measurement from the most coronal BIC to the bottom of the defect (height of reosseointegration), (d) linear measurement from the implant shoulder to the bottom of the bone defect (defect depths), (e) vertical bone fill, (f) BIC ratio (1) mineralized tissue area (mm2) including the newly formed bone and bone graft material; (2) alveolar bone height (mm) measured from the apex to the most coronal | - | SEM, EDS | 120   | NA, but approx. 40% of bone was lost after 120 days.                                                                                                                                                                                                                                                                                                                                                                                                                 | -                                                      | x-rays                                                                                                       | - | -            | None reported                |
| 111. Park et al.       | 2015b | Ligature                                                              | Braided cotton                       | 1.58 mm        | No                                              | 4m                                         | -                             | - | - | -                      | -                                             |                                                                                                                                                                                                                                                                                                                                                                                                                                                                                                                                                                                                                         | - | -        | 120   | NA, but approx. 40% of bone was lost after 120 days.                                                                                                                                                                                                                                                                                                                                                                                                                 | -                                                      | Histometric analysis                                                                                         | - | -            | None reported                |

|  |  |  |  |  |  |  |  |  |  |  |                                                                                                                                                                                                                                                                                                                                                                                                                                                                                                                                                                                                                                                                                                                                   |  |  |  |  |  |  |  |  |  |  |  |  |  |  |  |  |  |  |  |  |  |  |  |  |  |  |  |  |  |  |  |  |  |  |  |  |  |  |  |  |  |  |  |  |  |  |  |  |  |  |  |  |  |  |  |  |  |  |  |  |  |  |  |  |  |  |  |  |  |  |  |  |  |  |  |  |  |  |  |  |  |  |  |  |  |  |  |  |  |  |  |  |  |  |  |  |  |  |  |  |  |  |  |  |  |  |  |  |  |  |  |  |  |  |  |  |  |  |  |  |  |  |  |  |  |  |  |  |  |  |  |  |  |  |  |  |  |  |  |  |  |  |  |  |  |  |  |  |  |  |  |  |  |  |  |  |  |  |  |  |  |  |  |  |  |  |  |  |  |  |  |  |  |  |  |  |  |  |  |  |  |  |  |  |  |  |  |  |  |  |  |  |  |  |  |  |  |  |  |  |  |  |  |  |  |  |  |  |  |  |  |  |  |  |  |  |  |  |  |  |  |  |  |  |  |  |  |  |  |  |  |  |  |  |  |  |  |  |  |  |  |  |  |  |  |  |  |  |  |  |  |  |  |  |  |  |  |  |  |  |  |  |  |  |  |  |  |  |  |  |  |  |  |  |  |  |  |  |  |  |  |  |  |  |  |  |  |  |  |  |  |  |  |  |  |  |  |  |  |  |  |  |  |  |  |  |  |  |  |  |  |  |  |  |  |  |  |  |  |  |  |  |  |  |  |  |  |  |  |  |  |  |  |  |  |  |  |  |  |  |  |  |  |  |  |  |  |  |  |  |  |  |  |  |  |  |  |  |  |  |  |  |  |  |  |  |  |  |  |  |  |  |  |  |  |  |  |  |  |  |  |  |  |  |  |  |  |  |  |  |  |  |  |  |  |  |  |  |  |  |  |  |  |  |  |  |  |  |  |  |  |  |  |  |  |  |  |  |  |  |  |  |  |  |  |  |  |  |  |  |  |  |  |  |  |  |  |  |  |  |  |  |  |  |  |  |  |  |  |  |  |  |  |  |  |  |  |  |  |  |  |  |  |  |  |  |  |  |  |  |  |  |  |  |  |  |  |  |  |  |  |  |  |  |  |  |  |  |  |  |  |  |  |  |  |  |  |  |  |  |  |  |  |  |  |  |  |  |  |  |  |  |  |  |  |  |  |  |  |  |  |  |  |  |  |  |  |  |  |  |  |  |  |  |  |  |  |  |  |  |  |  |  |  |  |  |  |  |  |  |  |  |  |  |  |  |  |  |  |  |  |  |  |  |  |  |  |  |  |  |  |  |  |  |  |  |  |  |  |  |  |  |  |  |  |  |  |  |  |  |  |  |  |  |  |  |  |  |  |  |  |  |  |  |  |  |  |  |  |  |  |  |  |  |  |  |  |  |  |  |  |  |  |  |  |  |  |  |  |  |  |  |  |  |  |  |  |  |  |  |  |  |  |  |  |  |  |  |  |  |  |  |  |  |  |  |  |  |  |  |  |  |  |  |  |  |  |  |  |  |  |  |  |  |  |  |  |  |  |  |  |  |  |  |  |  |  |  |  |  |  |  |  |  |  |  |  |  |  |  |  |  |  |  |  |  |  |  |  |  |  |  |  |  |  |  |  |  |  |  |  |  |  |  |  |  |  |  |  |  |  |  |  |  |  |  |  |  |  |  |  |  |  |  |  |  |  |  |  |  |  |  |  |  |  |  |  |  |  |  |  |  |  |  |  |  |  |  |  |  |  |  |  |  |  |  |  |  |  |  |  |  |  |  |  |  |  |  |  |  |  |  |  |  |  |  |  |  |  |  |  |  |  |  |  |  |  |  |  |  |  |  |  |  |  |  |  |  |  |  |  |  |  |  |  |  |  |  |  |  |  |  |  |  |  |  |  |  |  |  |  |  |  |  |  |  |  |  |  |  |  |  |  |  |  |  |  |  |  |  |  |  |  |  |  |  |  |  |  |  |  |  |  |  |  |  |  |  |  |  |  |  |  |  |  |  |  |  |  |  |  |  |  |  |  |  |  |  |  |  |  |  |  |  |  |  |  |  |  |  |  |  |  |  |  |  |  |  |  |  |  |  |  |  |  |  |  |  |  |  |  |  |  |  |  |  |  |  |  |  |  |  |  |  |  |  |  |  |  |  |  |  |  |  |  |  |  |  |  |  |  |  |  |  |  |  |  |  |  |  |  |  |  |  |  |  |  |  |  |  |  |  |  |  |  |  |  |  |  |  |  |  |  |  |  |  |  |  |  |  |  |  |  |  |  |  |  |  |  |  |  |  |  |  |  |  |  |  |  |  |  |  |  |  |  |  |  |  |  |  |  |  |  |  |  |  |  |  |  |  |  |  |  |  |  |  |  |  |  |  |  |  |  |  |  |  |  |  |  |  |  |  |  |  |  |  |  |  |  |  |  |  |  |  |  |  |  |  |  |  |  |  |  |  |  |  |  |  |  |  |  |  |  |  |  |  |  |  |  |  |  |  |  |  |  |  |  |  |  |  |  |  |  |  |  |  |  |  |  |  |  |  |  |  |  |  |  |  |  |  |  |  |  |  |  |  |  |  |  |  |  |  |  |  |  |  |  |  |  |  |  |  |  |  |  |  |  |  |  |  |  |  |  |  |  |  |  |  |  |  |  |  |  |  |  |  |  |  |  |  |  |  |  |  |  |  |  |  |  |  |  |  |  |  |  |  |  |  |  |  |  |  |  |  |  |  |  |  |  |  |  |  |  |  |  |  |  |  |  |  |  |  |  |  |  |  |  |  |  |  |  |  |  |  |  |  |  |  |  |  |  |  |  |  |  |  |  |  |  |  |  |  |  |  |  |  |  |  |  |  |  |  |  |  |  |  |  |  |  |  |  |  |  |  |  |  |  |  |  |  |  |  |  |  |  |  |  |  |  |  |  |  |  |  |  |  |  |  |  |  |  |  |  |  |  |  |  |  |  |  |  |  |  |  |  |  |  |  |  |  |  |  |  |  |  |  |  |  |  |  |  |  |  |  |  |  |  |  |  |  |  |  |  |  |  |  |  |  |  |  |  |  |  |  |  |  |  |  |  |  |  |  |  |  |  |  |  |  |  |  |  |  |  |  |  |  |  |  |  |  |  |  |  |  |  |  |  |  |  |  |  |  |  |  |  |  |  |  |  |  |  |  |  |  |  |  |  |  |  |  |  |  |  |  |  |  |  |  |  |  |  |  |  |  |  |  |  |  |  |  |  |  |  |  |  |  |  |  |  |  |  |  |  |  |  |  |  |  |  |  |  |  |  |  |  |  |  |  |  |  |  |  |  |  |  |  |  |  |  |  |  |  |  |  |  |  |  |  |  |  |  |  |  |  |  |  |  |  |  |  |  |  |  |  |  |  |  |  |  |  |  |  |  |  |  |  |  |  |  |  |  |  |  |  |  |  |  |  |  |  |  |  |  |  |  |  |  |  |  |  |  |  |  |  |  |  |  |  |  |  |  |  |  |  |  |  |  |  |  |  |  |  |  |  |  |  |  |  |  |  |  |  |  |  |  |  |  |  |  |  |  |  |  |  |  |  |  |  |  |  |  |  |  |    |
|--|--|--|--|--|--|--|--|--|--|--|-----------------------------------------------------------------------------------------------------------------------------------------------------------------------------------------------------------------------------------------------------------------------------------------------------------------------------------------------------------------------------------------------------------------------------------------------------------------------------------------------------------------------------------------------------------------------------------------------------------------------------------------------------------------------------------------------------------------------------------|--|--|--|--|--|--|--|--|--|--|--|--|--|--|--|--|--|--|--|--|--|--|--|--|--|--|--|--|--|--|--|--|--|--|--|--|--|--|--|--|--|--|--|--|--|--|--|--|--|--|--|--|--|--|--|--|--|--|--|--|--|--|--|--|--|--|--|--|--|--|--|--|--|--|--|--|--|--|--|--|--|--|--|--|--|--|--|--|--|--|--|--|--|--|--|--|--|--|--|--|--|--|--|--|--|--|--|--|--|--|--|--|--|--|--|--|--|--|--|--|--|--|--|--|--|--|--|--|--|--|--|--|--|--|--|--|--|--|--|--|--|--|--|--|--|--|--|--|--|--|--|--|--|--|--|--|--|--|--|--|--|--|--|--|--|--|--|--|--|--|--|--|--|--|--|--|--|--|--|--|--|--|--|--|--|--|--|--|--|--|--|--|--|--|--|--|--|--|--|--|--|--|--|--|--|--|--|--|--|--|--|--|--|--|--|--|--|--|--|--|--|--|--|--|--|--|--|--|--|--|--|--|--|--|--|--|--|--|--|--|--|--|--|--|--|--|--|--|--|--|--|--|--|--|--|--|--|--|--|--|--|--|--|--|--|--|--|--|--|--|--|--|--|--|--|--|--|--|--|--|--|--|--|--|--|--|--|--|--|--|--|--|--|--|--|--|--|--|--|--|--|--|--|--|--|--|--|--|--|--|--|--|--|--|--|--|--|--|--|--|--|--|--|--|--|--|--|--|--|--|--|--|--|--|--|--|--|--|--|--|--|--|--|--|--|--|--|--|--|--|--|--|--|--|--|--|--|--|--|--|--|--|--|--|--|--|--|--|--|--|--|--|--|--|--|--|--|--|--|--|--|--|--|--|--|--|--|--|--|--|--|--|--|--|--|--|--|--|--|--|--|--|--|--|--|--|--|--|--|--|--|--|--|--|--|--|--|--|--|--|--|--|--|--|--|--|--|--|--|--|--|--|--|--|--|--|--|--|--|--|--|--|--|--|--|--|--|--|--|--|--|--|--|--|--|--|--|--|--|--|--|--|--|--|--|--|--|--|--|--|--|--|--|--|--|--|--|--|--|--|--|--|--|--|--|--|--|--|--|--|--|--|--|--|--|--|--|--|--|--|--|--|--|--|--|--|--|--|--|--|--|--|--|--|--|--|--|--|--|--|--|--|--|--|--|--|--|--|--|--|--|--|--|--|--|--|--|--|--|--|--|--|--|--|--|--|--|--|--|--|--|--|--|--|--|--|--|--|--|--|--|--|--|--|--|--|--|--|--|--|--|--|--|--|--|--|--|--|--|--|--|--|--|--|--|--|--|--|--|--|--|--|--|--|--|--|--|--|--|--|--|--|--|--|--|--|--|--|--|--|--|--|--|--|--|--|--|--|--|--|--|--|--|--|--|--|--|--|--|--|--|--|--|--|--|--|--|--|--|--|--|--|--|--|--|--|--|--|--|--|--|--|--|--|--|--|--|--|--|--|--|--|--|--|--|--|--|--|--|--|--|--|--|--|--|--|--|--|--|--|--|--|--|--|--|--|--|--|--|--|--|--|--|--|--|--|--|--|--|--|--|--|--|--|--|--|--|--|--|--|--|--|--|--|--|--|--|--|--|--|--|--|--|--|--|--|--|--|--|--|--|--|--|--|--|--|--|--|--|--|--|--|--|--|--|--|--|--|--|--|--|--|--|--|--|--|--|--|--|--|--|--|--|--|--|--|--|--|--|--|--|--|--|--|--|--|--|--|--|--|--|--|--|--|--|--|--|--|--|--|--|--|--|--|--|--|--|--|--|--|--|--|--|--|--|--|--|--|--|--|--|--|--|--|--|--|--|--|--|--|--|--|--|--|--|--|--|--|--|--|--|--|--|--|--|--|--|--|--|--|--|--|--|--|--|--|--|--|--|--|--|--|--|--|--|--|--|--|--|--|--|--|--|--|--|--|--|--|--|--|--|--|--|--|--|--|--|--|--|--|--|--|--|--|--|--|--|--|--|--|--|--|--|--|--|--|--|--|--|--|--|--|--|--|--|--|--|--|--|--|--|--|--|--|--|--|--|--|--|--|--|--|--|--|--|--|--|--|--|--|--|--|--|--|--|--|--|--|--|--|--|--|--|--|--|--|--|--|--|--|--|--|--|--|--|--|--|--|--|--|--|--|--|--|--|--|--|--|--|--|--|--|--|--|--|--|--|--|--|--|--|--|--|--|--|--|--|--|--|--|--|--|--|--|--|--|--|--|--|--|--|--|--|--|--|--|--|--|--|--|--|--|--|--|--|--|--|--|--|--|--|--|--|--|--|--|--|--|--|--|--|--|--|--|--|--|--|--|--|--|--|--|--|--|--|--|--|--|--|--|--|--|--|--|--|--|--|--|--|--|--|--|--|--|--|--|--|--|--|--|--|--|--|--|--|--|--|--|--|--|--|--|--|--|--|--|--|--|--|--|--|--|--|--|--|--|--|--|--|--|--|--|--|--|--|--|--|--|--|--|--|--|--|--|--|--|--|--|--|--|--|--|--|--|--|--|--|--|--|--|--|--|--|--|--|--|--|--|--|--|--|--|--|--|--|--|--|--|--|--|--|--|--|--|--|--|--|--|--|--|--|--|--|--|--|--|--|--|--|--|--|--|--|--|--|--|--|--|--|--|--|--|--|--|--|--|--|--|--|--|--|--|--|--|--|--|--|--|--|--|--|--|--|--|--|--|--|--|--|--|--|--|--|--|--|--|--|--|--|--|--|--|--|--|--|--|--|--|--|--|--|--|--|--|--|--|--|--|--|--|--|--|--|--|--|--|--|--|--|--|--|--|--|--|--|--|--|--|--|--|--|--|--|--|--|--|--|--|--|--|--|--|--|--|--|--|--|--|--|--|--|--|--|--|--|--|--|--|--|--|--|--|--|--|--|--|--|--|--|--|--|--|--|--|--|--|--|--|--|--|--|--|--|--|--|--|--|--|--|--|--|--|--|--|--|--|--|--|--|--|--|--|--|--|--|--|--|--|--|--|--|--|--|--|--|--|--|--|--|--|--|--|--|--|--|--|--|--|--|--|--|--|--|--|--|--|--|--|--|--|--|--|--|--|--|--|--|--|--|--|--|--|--|--|--|--|--|--|--|--|--|--|--|--|--|--|--|--|--|--|--|--|--|--|--|--|--|--|--|--|--|--|--|--|--|--|--|--|--|--|--|--|--|--|--|--|--|--|--|--|--|--|--|--|--|--|--|--|--|--|--|--|--|--|--|--|--|--|--|--|--|--|--|--|--|--|--|--|--|--|--|--|--|--|--|--|--|--|--|--|--|--|--|--|--|--|--|--|--|--|--|--|--|--|--|--|--|--|--|--|--|--|--|--|--|--|--|--|--|--|--|--|--|--|--|--|--|--|--|--|--|--|--|--|--|--|--|--|--|--|--|--|--|--|--|--|--|--|--|--|--|--|--|--|--|--|--|--|--|--|--|--|--|--|--|--|--|--|--|--|--|--|--|--|--|--|--|--|--|--|--|--|--|--|--|--|--|--|--|--|--|--|--|--|--|--|--|--|--|--|--|--|--|----|
|  |  |  |  |  |  |  |  |  |  |  | position of the alveolar bone; (3) first bone-to-implant contact (first BIC) height (mm) measured from the apex of the implants to the first BIC position; (4) re-osseointegration height (mm) as the first BIC height from the bottom of the defect; (5) ratio of linear re-osseointegration calculated as the ratio of re-osseointegration height to defect depth; (6) BIC (%) within re-osseointegrated bone as the ratio of total perimeter of bone contact to the whole thread perimeter (mm) between the bottom of the defect and the first BIC position; and (7) BIC ratio (%) in the residual bone as the ratio of the total perimeter of bone contact to the whole thread perimeter (mm) below the bottom of the defect. |  |  |  |  |  |  |  |  |  |  |  |  |  |  |  |  |  |  |  |  |  |  |  |  |  |  |  |  |  |  |  |  |  |  |  |  |  |  |  |  |  |  |  |  |  |  |  |  |  |  |  |  |  |  |  |  |  |  |  |  |  |  |  |  |  |  |  |  |  |  |  |  |  |  |  |  |  |  |  |  |  |  |  |  |  |  |  |  |  |  |  |  |  |  |  |  |  |  |  |  |  |  |  |  |  |  |  |  |  |  |  |  |  |  |  |  |  |  |  |  |  |  |  |  |  |  |  |  |  |  |  |  |  |  |  |  |  |  |  |  |  |  |  |  |  |  |  |  |  |  |  |  |  |  |  |  |  |  |  |  |  |  |  |  |  |  |  |  |  |  |  |  |  |  |  |  |  |  |  |  |  |  |  |  |  |  |  |  |  |  |  |  |  |  |  |  |  |  |  |  |  |  |  |  |  |  |  |  |  |  |  |  |  |  |  |  |  |  |  |  |  |  |  |  |  |  |  |  |  |  |  |  |  |  |  |  |  |  |  |  |  |  |  |  |  |  |  |  |  |  |  |  |  |  |  |  |  |  |  |  |  |  |  |  |  |  |  |  |  |  |  |  |  |  |  |  |  |  |  |  |  |  |  |  |  |  |  |  |  |  |  |  |  |  |  |  |  |  |  |  |  |  |  |  |  |  |  |  |  |  |  |  |  |  |  |  |  |  |  |  |  |  |  |  |  |  |  |  |  |  |  |  |  |  |  |  |  |  |  |  |  |  |  |  |  |  |  |  |  |  |  |  |  |  |  |  |  |  |  |  |  |  |  |  |  |  |  |  |  |  |  |  |  |  |  |  |  |  |  |  |  |  |  |  |  |  |  |  |  |  |  |  |  |  |  |  |  |  |  |  |  |  |  |  |  |  |  |  |  |  |  |  |  |  |  |  |  |  |  |  |  |  |  |  |  |  |  |  |  |  |  |  |  |  |  |  |  |  |  |  |  |  |  |  |  |  |  |  |  |  |  |  |  |  |  |  |  |  |  |  |  |  |  |  |  |  |  |  |  |  |  |  |  |  |  |  |  |  |  |  |  |  |  |  |  |  |  |  |  |  |  |  |  |  |  |  |  |  |  |  |  |  |  |  |  |  |  |  |  |  |  |  |  |  |  |  |  |  |  |  |  |  |  |  |  |  |  |  |  |  |  |  |  |  |  |  |  |  |  |  |  |  |  |  |  |  |  |  |  |  |  |  |  |  |  |  |  |  |  |  |  |  |  |  |  |  |  |  |  |  |  |  |  |  |  |  |  |  |  |  |  |  |  |  |  |  |  |  |  |  |  |  |  |  |  |  |  |  |  |  |  |  |  |  |  |  |  |  |  |  |  |  |  |  |  |  |  |  |  |  |  |  |  |  |  |  |  |  |  |  |  |  |  |  |  |  |  |  |  |  |  |  |  |  |  |  |  |  |  |  |  |  |  |  |  |  |  |  |  |  |  |  |  |  |  |  |  |  |  |  |  |  |  |  |  |  |  |  |  |  |  |  |  |  |  |  |  |  |  |  |  |  |  |  |  |  |  |  |  |  |  |  |  |  |  |  |  |  |  |  |  |  |  |  |  |  |  |  |  |  |  |  |  |  |  |  |  |  |  |  |  |  |  |  |  |  |  |  |  |  |  |  |  |  |  |  |  |  |  |  |  |  |  |  |  |  |  |  |  |  |  |  |  |  |  |  |  |  |  |  |  |  |  |  |  |  |  |  |  |  |  |  |  |  |  |  |  |  |  |  |  |  |  |  |  |  |  |  |  |  |  |  |  |  |  |  |  |  |  |  |  |  |  |  |  |  |  |  |  |  |  |  |  |  |  |  |  |  |  |  |  |  |  |  |  |  |  |  |  |  |  |  |  |  |  |  |  |  |  |  |  |  |  |  |  |  |  |  |  |  |  |  |  |  |  |  |  |  |  |  |  |  |  |  |  |  |  |  |  |  |  |  |  |  |  |  |  |  |  |  |  |  |  |  |  |  |  |  |  |  |  |  |  |  |  |  |  |  |  |  |  |  |  |  |  |  |  |  |  |  |  |  |  |  |  |  |  |  |  |  |  |  |  |  |  |  |  |  |  |  |  |  |  |  |  |  |  |  |  |  |  |  |  |  |  |  |  |  |  |  |  |  |  |  |  |  |  |  |  |  |  |  |  |  |  |  |  |  |  |  |  |  |  |  |  |  |  |  |  |  |  |  |  |  |  |  |  |  |  |  |  |  |  |  |  |  |  |  |  |  |  |  |  |  |  |  |  |  |  |  |  |  |  |  |  |  |  |  |  |  |  |  |  |  |  |  |  |  |  |  |  |  |  |  |  |  |  |  |  |  |  |  |  |  |  |  |  |  |  |  |  |  |  |  |  |  |  |  |  |  |  |  |  |  |  |  |  |  |  |  |  |  |  |  |  |  |  |  |  |  |  |  |  |  |  |  |  |  |  |  |  |  |  |  |  |  |  |  |  |  |  |  |  |  |  |  |  |  |  |  |  |  |  |  |  |  |  |  |  |  |  |  |  |  |  |  |  |  |  |  |  |  |  |  |  |  |  |  |  |  |  |  |  |  |  |  |  |  |  |  |  |  |  |  |  |  |  |  |  |  |  |  |  |  |  |  |  |  |  |  |  |  |  |  |  |  |  |  |  |  |  |  |  |  |  |  |  |  |  |  |  |  |  |  |  |  |  |  |  |  |  |  |  |  |  |  |  |  |  |  |  |  |  |  |  |  |  |  |  |  |  |  |  |  |  |  |  |  |  |  |  |  |  |  |  |  |  |  |  |  |  |  |  |  |  |  |  |  |  |  |  |  |  |  |  |  |  |  |  |  |  |  |  |  |  |  |  |  |  |  |  |  |  |  |  |  |  |  |  |  |  |  |  |  |  |  |  |  |  |  |  |  |  |  |  |  |  |  |  |  |  |  |  |  |  |  |  |  |  |  |  |  |  |  |  |  |  |  |  |  |  |  |  |  |  |  |  |  |  |  |  |  |  |  |  |  |  |  |  |  |  |  |  |  |  |  |  |  |  |  |  |  |  |  |  |  |  |  |  |  |  |  |  |  |  |  |  |  |  |  |  |  |  |  |  |  |  |  |  |  |  |  |  |  |  |  |  |  |  |  |  |  |  |  |  |  |  |  |  |  |  |  |  |  |  |  |  |  |  |  |  |  |  |  |  |  |  |  |  |  |  |  |  |  |  |  |  |  |  |  |  |  |  |  |  |  |  |  |  |  |  |  |  |  |  |  |  |  |  |  |  |  |  |  |  |  |  |  |  |  |  |  |  |  |  |  |  |  |  |  |  |  |  |  |  |  |  |  |  |  |  |  |  |  |  |  |  |  |  |  |  |  |  |  |  |  |  |  |  |  |  |  |  |  |  |  |  |  |  |  |  |  |  |  |  |  |  |  |  |  |  |  |  |  |  |  |  |  |  |  |  |  |  |  |  |  |  |  |  |  |  |  |  |  |  |  |  |  |  |  |  |  |  |  |  |  |  |  |  |  |  |  |  |  |  |  |  |  |  |  |  |  |  | </ |
|--|--|--|--|--|--|--|--|--|--|--|-----------------------------------------------------------------------------------------------------------------------------------------------------------------------------------------------------------------------------------------------------------------------------------------------------------------------------------------------------------------------------------------------------------------------------------------------------------------------------------------------------------------------------------------------------------------------------------------------------------------------------------------------------------------------------------------------------------------------------------|--|--|--|--|--|--|--|--|--|--|--|--|--|--|--|--|--|--|--|--|--|--|--|--|--|--|--|--|--|--|--|--|--|--|--|--|--|--|--|--|--|--|--|--|--|--|--|--|--|--|--|--|--|--|--|--|--|--|--|--|--|--|--|--|--|--|--|--|--|--|--|--|--|--|--|--|--|--|--|--|--|--|--|--|--|--|--|--|--|--|--|--|--|--|--|--|--|--|--|--|--|--|--|--|--|--|--|--|--|--|--|--|--|--|--|--|--|--|--|--|--|--|--|--|--|--|--|--|--|--|--|--|--|--|--|--|--|--|--|--|--|--|--|--|--|--|--|--|--|--|--|--|--|--|--|--|--|--|--|--|--|--|--|--|--|--|--|--|--|--|--|--|--|--|--|--|--|--|--|--|--|--|--|--|--|--|--|--|--|--|--|--|--|--|--|--|--|--|--|--|--|--|--|--|--|--|--|--|--|--|--|--|--|--|--|--|--|--|--|--|--|--|--|--|--|--|--|--|--|--|--|--|--|--|--|--|--|--|--|--|--|--|--|--|--|--|--|--|--|--|--|--|--|--|--|--|--|--|--|--|--|--|--|--|--|--|--|--|--|--|--|--|--|--|--|--|--|--|--|--|--|--|--|--|--|--|--|--|--|--|--|--|--|--|--|--|--|--|--|--|--|--|--|--|--|--|--|--|--|--|--|--|--|--|--|--|--|--|--|--|--|--|--|--|--|--|--|--|--|--|--|--|--|--|--|--|--|--|--|--|--|--|--|--|--|--|--|--|--|--|--|--|--|--|--|--|--|--|--|--|--|--|--|--|--|--|--|--|--|--|--|--|--|--|--|--|--|--|--|--|--|--|--|--|--|--|--|--|--|--|--|--|--|--|--|--|--|--|--|--|--|--|--|--|--|--|--|--|--|--|--|--|--|--|--|--|--|--|--|--|--|--|--|--|--|--|--|--|--|--|--|--|--|--|--|--|--|--|--|--|--|--|--|--|--|--|--|--|--|--|--|--|--|--|--|--|--|--|--|--|--|--|--|--|--|--|--|--|--|--|--|--|--|--|--|--|--|--|--|--|--|--|--|--|--|--|--|--|--|--|--|--|--|--|--|--|--|--|--|--|--|--|--|--|--|--|--|--|--|--|--|--|--|--|--|--|--|--|--|--|--|--|--|--|--|--|--|--|--|--|--|--|--|--|--|--|--|--|--|--|--|--|--|--|--|--|--|--|--|--|--|--|--|--|--|--|--|--|--|--|--|--|--|--|--|--|--|--|--|--|--|--|--|--|--|--|--|--|--|--|--|--|--|--|--|--|--|--|--|--|--|--|--|--|--|--|--|--|--|--|--|--|--|--|--|--|--|--|--|--|--|--|--|--|--|--|--|--|--|--|--|--|--|--|--|--|--|--|--|--|--|--|--|--|--|--|--|--|--|--|--|--|--|--|--|--|--|--|--|--|--|--|--|--|--|--|--|--|--|--|--|--|--|--|--|--|--|--|--|--|--|--|--|--|--|--|--|--|--|--|--|--|--|--|--|--|--|--|--|--|--|--|--|--|--|--|--|--|--|--|--|--|--|--|--|--|--|--|--|--|--|--|--|--|--|--|--|--|--|--|--|--|--|--|--|--|--|--|--|--|--|--|--|--|--|--|--|--|--|--|--|--|--|--|--|--|--|--|--|--|--|--|--|--|--|--|--|--|--|--|--|--|--|--|--|--|--|--|--|--|--|--|--|--|--|--|--|--|--|--|--|--|--|--|--|--|--|--|--|--|--|--|--|--|--|--|--|--|--|--|--|--|--|--|--|--|--|--|--|--|--|--|--|--|--|--|--|--|--|--|--|--|--|--|--|--|--|--|--|--|--|--|--|--|--|--|--|--|--|--|--|--|--|--|--|--|--|--|--|--|--|--|--|--|--|--|--|--|--|--|--|--|--|--|--|--|--|--|--|--|--|--|--|--|--|--|--|--|--|--|--|--|--|--|--|--|--|--|--|--|--|--|--|--|--|--|--|--|--|--|--|--|--|--|--|--|--|--|--|--|--|--|--|--|--|--|--|--|--|--|--|--|--|--|--|--|--|--|--|--|--|--|--|--|--|--|--|--|--|--|--|--|--|--|--|--|--|--|--|--|--|--|--|--|--|--|--|--|--|--|--|--|--|--|--|--|--|--|--|--|--|--|--|--|--|--|--|--|--|--|--|--|--|--|--|--|--|--|--|--|--|--|--|--|--|--|--|--|--|--|--|--|--|--|--|--|--|--|--|--|--|--|--|--|--|--|--|--|--|--|--|--|--|--|--|--|--|--|--|--|--|--|--|--|--|--|--|--|--|--|--|--|--|--|--|--|--|--|--|--|--|--|--|--|--|--|--|--|--|--|--|--|--|--|--|--|--|--|--|--|--|--|--|--|--|--|--|--|--|--|--|--|--|--|--|--|--|--|--|--|--|--|--|--|--|--|--|--|--|--|--|--|--|--|--|--|--|--|--|--|--|--|--|--|--|--|--|--|--|--|--|--|--|--|--|--|--|--|--|--|--|--|--|--|--|--|--|--|--|--|--|--|--|--|--|--|--|--|--|--|--|--|--|--|--|--|--|--|--|--|--|--|--|--|--|--|--|--|--|--|--|--|--|--|--|--|--|--|--|--|--|--|--|--|--|--|--|--|--|--|--|--|--|--|--|--|--|--|--|--|--|--|--|--|--|--|--|--|--|--|--|--|--|--|--|--|--|--|--|--|--|--|--|--|--|--|--|--|--|--|--|--|--|--|--|--|--|--|--|--|--|--|--|--|--|--|--|--|--|--|--|--|--|--|--|--|--|--|--|--|--|--|--|--|--|--|--|--|--|--|--|--|--|--|--|--|--|--|--|--|--|--|--|--|--|--|--|--|--|--|--|--|--|--|--|--|--|--|--|--|--|--|--|--|--|--|--|--|--|--|--|--|--|--|--|--|--|--|--|--|--|--|--|--|--|--|--|--|--|--|--|--|--|--|--|--|--|--|--|--|--|--|--|--|--|--|--|--|--|--|--|--|--|--|--|--|--|--|--|--|--|--|--|--|--|--|--|--|--|--|--|--|--|--|--|--|--|--|--|--|--|--|--|--|--|--|--|--|--|--|--|--|--|--|--|--|--|--|--|--|--|--|--|--|--|--|--|--|--|--|--|--|--|--|--|--|--|--|--|--|--|--|--|--|--|--|--|--|--|--|--|--|--|--|--|--|--|--|--|--|--|--|--|--|--|--|--|--|--|--|--|--|--|--|--|--|--|--|--|--|--|--|--|--|--|--|--|--|--|--|--|--|--|--|--|--|--|--|--|--|--|--|--|--|--|--|--|--|--|--|--|--|--|--|--|--|--|--|--|--|--|--|--|--|--|--|--|--|--|--|--|--|--|--|--|--|--|--|--|--|--|--|--|--|--|--|--|--|--|--|--|--|--|--|--|--|--|--|--|--|--|--|--|--|--|--|--|--|--|--|--|--|--|--|--|--|--|--|--|--|--|--|--|--|--|--|--|--|--|--|--|--|--|--|--|--|--|--|--|--|--|--|--|----|

|                     |      |                                                                                                                                                               |                                                                  |    |                                 |                                         |                                                                                                               |                                                                            |   |                                                                                                                    |                                                                       |                                                                                                                 |                                                                                                                    |   |     |                                                                                                                                                                                  |                                                                        |                                                                                                                                                   |   |             |                                                          |
|---------------------|------|---------------------------------------------------------------------------------------------------------------------------------------------------------------|------------------------------------------------------------------|----|---------------------------------|-----------------------------------------|---------------------------------------------------------------------------------------------------------------|----------------------------------------------------------------------------|---|--------------------------------------------------------------------------------------------------------------------|-----------------------------------------------------------------------|-----------------------------------------------------------------------------------------------------------------|--------------------------------------------------------------------------------------------------------------------|---|-----|----------------------------------------------------------------------------------------------------------------------------------------------------------------------------------|------------------------------------------------------------------------|---------------------------------------------------------------------------------------------------------------------------------------------------|---|-------------|----------------------------------------------------------|
| 114. Shi et al      | 2015 | Ligature, submarginal                                                                                                                                         | Cotton with intertwined stainless steel wire of 0,25 mm diameter | NA | Every 3w                        | At approximately 40% bone loss          | Ligatures around all implants                                                                                 | At baseline (ligature removal)+ 1, 2, 3 m after ligature removal: BOP, PPD | - | At baseline (ligature removal) and 1, 2, 3 m: samples from 4 sites per implant. 1 positive site = positive implant | CT and micro-CT at baseline (ligature removal) and 3m                 | Ground sections. 4 buccal-lingual sections per implant. Distance rom first bone-implant contact to implant apex | -                                                                                                                  | - | NA  | NA, ligatures removed at different time points                                                                                                                                   | -                                                                      | -                                                                                                                                                 | - | -           | No losses                                                |
| 115. Takamori et al | 2017 | Immunization (I) and then palatal injection of Lippolysaccharide (LPS) in I vs non-immunized (nI) rats vs PBS injection in I rats vs PBS injection in nI rats | -                                                                | -  | -                               | 34d total                               | 5 implant groups + 5 tooth groups<br>(1) Baseline group<br>(2) nI-PBS<br>(3) I-PBS<br>(4) nI-LPS<br>(5) I-LPS | -                                                                          | - | -                                                                                                                  | -                                                                     | No of inflammatory cells, osteoclasts etc                                                                       | Distance from first implant thread to 1. gingival crest, 2. Apical end of junctional epithelium and 3. Bone crest. | - | 34  | See fig 9 in paper. Significantly longer distance from first thread to bone crest in immunized LPS group compared to other groups. No attachment loss around teeth in any group. | -                                                                      | -                                                                                                                                                 | - | -           | -                                                        |
| 116. Htet           | 2016 | Ligature (submarginal position) 3X3 MM BUCCAL DEFECT MADE ATT IMPLANT INSERTION                                                                               | Cotton with silk                                                 | NA | New ligatures inserted every 2w | 4w (until approx. 40% bone resorption ) | -                                                                                                             | -                                                                          | - | -                                                                                                                  | Long cone with custom made paralleling device                         | -                                                                                                               | -                                                                                                                  | - | 28  | NA, not measured                                                                                                                                                                 | -                                                                      | -                                                                                                                                                 | - | -           | 4 implants lost after 3w of experimental periimplantitis |
| 117. Ishii et al    | 2016 | Ligature                                                                                                                                                      | Dental floss                                                     | NA | -                               | 90d                                     | Same as experimental side                                                                                     | -                                                                          | - | -                                                                                                                  | (1) Standardized dental radiographs (70kv, 15mA, 0,25s). (2) Micro-CT | Ground sections                                                                                                 | -                                                                                                                  | - | 90  | (1) UV-group: 2,0±0,5 mm Controls: 2,7±0,4 mm                                                                                                                                    | (2) Area of bone resorption mm2 UV-group: 45,7±9,6 Controls: 64,4±10,6 | (1) Dental x-rays Dental X-rays, standardized technique with silicone bite block mean of mesial and distal aspect of each implant<br>(2) Micro-CT | - | (1) 2,7±0,4 | -                                                        |
| 118. Machtei et al  | 2016 | Ligature, submarginal retained with cyanoacrylate around all implants                                                                                         | NA (retraction cords)                                            | NA | No                              | 2m                                      | Ligatures around all implats                                                                                  | -                                                                          | - | -                                                                                                                  | -                                                                     | -                                                                                                               | -                                                                                                                  | - | 90  | NA. not measured                                                                                                                                                                 | 2-4 mm wide (not further specified)                                    | -                                                                                                                                                 | - | -           | -                                                        |
| 119. Madi et al     | 2016 | Ligature, submarginal position                                                                                                                                | Silk                                                             | NA | No                              | 4m                                      | Ligatures around all implants                                                                                 | -                                                                          | - | Yes – during ligature phase to confirm presence of                                                                 | -                                                                     | Yes, implant shoulder to first bone contact. BIC etc.                                                           | SEM to investigate residual HA coating.                                                                            | - | 120 | Marginal bone loss extending to the coronal or middle third of all implats. Not further specified.                                                                               | -                                                                      | -                                                                                                                                                 | - | -           | -                                                        |

| periodontopathic bacteria. |      |                        |                |         |                                                 |                               |                               |                                                            |   |                                |                             |                                                                                                                                                                                                                                                                                                                                                                                                                                                                                                                                                                                                                                                    |                 |   |                  |                                                                                                                                                                                                                                                                                                                                                                                                                                                                                                                                                                                                                                                                                                   |   |                                                                  |   |   |                              |
|----------------------------|------|------------------------|----------------|---------|-------------------------------------------------|-------------------------------|-------------------------------|------------------------------------------------------------|---|--------------------------------|-----------------------------|----------------------------------------------------------------------------------------------------------------------------------------------------------------------------------------------------------------------------------------------------------------------------------------------------------------------------------------------------------------------------------------------------------------------------------------------------------------------------------------------------------------------------------------------------------------------------------------------------------------------------------------------------|-----------------|---|------------------|---------------------------------------------------------------------------------------------------------------------------------------------------------------------------------------------------------------------------------------------------------------------------------------------------------------------------------------------------------------------------------------------------------------------------------------------------------------------------------------------------------------------------------------------------------------------------------------------------------------------------------------------------------------------------------------------------|---|------------------------------------------------------------------|---|---|------------------------------|
| 120. Nguyen Vo et al.      | 2016 | Ligature               | Silk           | 5-0     | NP                                              | 0, 1, 2, 3, 4w                | -                             | -                                                          | - | IL-1<br>TNF- $\alpha$<br>GAPDH | Micro-CT scans              | Bone level                                                                                                                                                                                                                                                                                                                                                                                                                                                                                                                                                                                                                                         | -               | - | 0, 7, 14, 21, 28 | <b>Bone height (Micro-CT)</b><br>0: 0.81±0.04 (mesial)<br>0: 0.84±0.03 (distal)<br>4w: 0.37±0.03 (mesial)<br>4w: 0.37±0.07 (distal)<br><b>Bone height (histo)</b><br>0: 0.9±0.06 (buccal)<br>0: 0.84±0.09 (palatal)<br>4w: 0.53±0.03 (buccal)<br>4w: 0.45±0.04 (palatal)                                                                                                                                                                                                                                                                                                                                                                                                                          | - | Micro-CT scans and histometric measurements                      | - | - | None reported                |
| 121. Xu et al              | 2016 | Ligature – submarginal | Cotton         | NA      | Ligatures repositioned monthly                  | 3m (at approx. 40% bone loss) | Ligatures around all implants | PD, CAL                                                    | - | -                              | IO at baseline, ligature    |                                                                                                                                                                                                                                                                                                                                                                                                                                                                                                                                                                                                                                                    |                 |   | 90               | 4.6 mm mean bone loss                                                                                                                                                                                                                                                                                                                                                                                                                                                                                                                                                                                                                                                                             | - | X-ray, paralleling technique                                     | - | - | 2 lost during ligature phase |
| 122. Godoy-Gallardo et al  | 2016 | Ligature, submarginal  | Silk           | 4-0     | NA                                              | 2m                            | Ligatures around all implants | PPD, mucosal recession, keratinized ginigiva, CAL, PI, BoP | - | -                              | Periapical X-rays, micro-ct | Bone and tissue resorption with light microscopy. SEM also used.                                                                                                                                                                                                                                                                                                                                                                                                                                                                                                                                                                                   | Ground sections | - | 30, 60           | 30 days<br>Ti_Ag: 3,5±0,4<br>Ti_TSP: 3,6±0,5<br>Ti: 3,9±0,7<br><br>60 days<br>Ti_Ag: 4,1±0,5<br>Ti_TSP: 4,0±0,5<br>Ti: 4,6±0,7<br><b>IS-BD (clinical)</b><br>Immediate model<br>3.88±0.99 (mesial)<br>3.88±0.99 (distal)<br>5.38±1.30 (buccal)<br>3.38±0.52 (lingual)<br>Conventional model<br>3.50±0.53 (mesial)<br>3.13±0.35 (distal)<br>4.00±0.53 (buccal)<br>3.13±0.35 (lingual)<br><b>IS-BD (histological)</b><br>Immediate model<br>6.02±1.20 (buccal)<br>4.41±1.07 (lingual)<br>Conventional model<br>4.34±0.86 (buccal)<br>3.81±0.61 (lingual)<br><b>BC-BD (histological)</b><br>Immediate model<br>0.01±0.00 (buccal)<br>1.06±0.73 (lingual)<br>Conventional model<br>0.11±0.20 (buccal) | - | X-ray, periapical, standardized mean of mesial and distal aspect | - | - | No losses                    |
| 123. Park et al.           | 2017 | Ligature               | Braided cotton | 1.58 mm | Additional ligature every 4 weeks (no exchange) | 4m                            | -                             | IS-BD                                                      | - | -                              | IO                          | (1) the mineralized tissue area (mm2), including the newly formed bone and bone graft material; (2) coronal bone loss (IS-BD) from the implant shoulder (IS) to the bottom of the defect (BD); (3) defect depth (BC-BD) from the bone crest (BC) to BD; (4) the re-osseointegration height (mm) as the most coronal BIC level from BD; (5) vertical bone fill (%) as the ratio of the re-osseointegration height to IS-BD; (6) total perimeter of BIC (mm) within the re-osseointegrated bone, and (7) the BIC ratio (%) within re-osseointegrated bone as the ratio of (1) the mineralized tissue area (mm2), including the newly formed bone and | -               | - | 120              |                                                                                                                                                                                                                                                                                                                                                                                                                                                                                                                                                                                                                                                                                                   | - | Histometric analysis                                             | - | - | None reported                |

|  |  |  |  |  |  |  |  |  |  |  |  |  |  |  |  |  |  |  |  |  |  |  |  |  |  |  |  |  |  |  |  |  |  |  |  |  |  |  |  |  |  |  |  |  |  |  |  |  |  |  |  |  |  |  |  |  |  |  |  |  |  |  |  |  |  |  |  |  |  |  |  |  |  |  |  |  |  |  |  |  |  |  |  |  |  |  |  |  |  |  |  |  |  |  |  |  |  |  |  |  |  |  |  |  |  |  |  |  |  |  |  |  |  |  |  |  |  |  |  |  |  |  |  |  |  |  |  |  |  |  |  |  |  |  |  |  |  |  |  |  |  |  |  |  |  |  |  |  |  |  |  |  |  |  |  |  |  |  |  |  |  |  |  |  |  |  |  |  |  |  |  |  |  |  |  |  |  |  |  |  |  |  |  |  |  |  |  |  |  |  |  |  |  |  |  |  |  |  |  |  |  |  |  |  |  |  |  |  |  |  |  |  |  |  |  |  |  |  |  |  |  |  |  |  |  |  |  |  |  |  |  |  |  |  |  |  |  |  |  |  |  |  |  |  |  |  |  |  |  |  |  |  |  |  |  |  |  |  |  |  |  |  |  |  |  |  |  |  |  |  |  |  |  |  |  |  |  |  |  |  |  |  |  |  |  |  |  |  |  |  |  |  |  |  |  |  |  |  |  |  |  |  |  |  |  |  |  |  |  |  |  |  |  |  |  |  |  |  |  |  |  |  |  |  |  |  |  |  |  |  |  |  |  |  |  |  |  |  |  |  |  |  |  |  |  |  |  |  |  |  |  |  |  |  |  |  |  |  |  |  |  |  |  |  |  |  |  |  |  |  |  |  |  |  |  |  |  |  |  |  |  |  |  |  |  |  |  |  |  |  |  |  |  |  |  |  |  |  |  |  |  |  |  |  |  |  |  |  |  |  |  |  |  |  |  |  |  |  |  |  |  |  |  |  |  |  |  |  |  |  |  |  |  |  |  |  |  |  |  |  |  |  |  |  |  |  |  |  |  |  |  |  |  |  |  |  |  |  |  |  |  |  |  |  |  |  |  |  |  |  |  |  |  |  |  |  |  |  |  |  |  |  |  |  |  |  |  |  |  |  |  |  |  |  |  |  |  |  |  |  |  |  |  |  |  |  |  |  |  |  |  |  |  |  |  |  |  |  |  |  |  |  |  |  |  |  |  |  |  |  |  |  |  |  |  |  |  |  |  |  |  |  |  |  |  |  |  |  |  |  |  |  |  |  |  |  |  |  |  |  |  |  |  |  |  |  |  |  |  |  |  |  |  |  |  |  |  |  |  |  |  |  |  |  |  |  |  |  |  |  |  |  |  |  |  |  |  |  |  |  |  |  |  |  |  |  |  |  |  |  |  |  |  |  |  |  |  |  |  |  |  |  |  |  |  |  |  |  |  |  |  |  |  |  |  |  |  |  |  |  |  |  |  |  |  |  |  |  |  |  |  |  |  |  |  |  |  |  |  |  |  |  |  |  |  |  |  |  |  |  |  |  |  |  |  |  |  |  |  |  |  |  |  |  |  |  |  |  |  |  |  |  |  |  |  |  |  |  |  |  |  |  |  |  |  |  |  |  |  |  |  |  |  |  |  |  |  |  |  |  |  |  |  |  |  |  |  |  |  |  |  |  |  |  |  |  |  |  |  |  |  |  |  |  |  |  |  |  |  |  |  |  |  |  |  |  |  |  |  |  |  |  |  |  |  |  |  |  |  |  |  |  |  |  |  |  |  |  |  |  |  |  |  |  |  |  |  |  |  |  |  |  |  |  |  |  |  |  |  |  |  |  |  |  |  |  |  |  |  |  |  |  |  |  |  |  |  |  |  |  |  |  |  |  |  |  |  |  |  |  |  |  |  |  |  |  |  |  |  |  |  |  |  |  |  |  |  |  |  |  |  |  |  |  |  |  |  |  |  |  |  |  |  |  |  |  |  |  |  |  |  |  |  |  |  |  |  |  |  |  |  |  |  |  |  |  |  |  |  |  |  |  |  |  |  |  |  |  |  |  |  |  |  |  |  |  |  |  |  |  |  |  |  |  |  |  |  |  |  |  |  |  |  |  |  |  |  |  |  |  |  |  |  |  |  |  |  |  |  |  |  |  |  |  |  |  |  |  |  |  |  |  |  |  |  |  |  |  |  |  |  |  |  |  |  |  |  |  |  |  |  |  |  |  |  |  |  |  |  |  |  |  |  |  |  |  |  |  |  |  |  |  |  |  |  |  |  |  |  |  |  |  |  |  |  |  |  |  |  |  |  |  |  |  |  |  |  |  |  |  |  |  |  |  |  |  |  |  |  |  |  |  |  |  |  |  |  |  |  |  |  |  |  |  |  |  |  |  |  |  |  |  |  |  |  |  |  |  |  |  |  |  |  |  |  |  |  |  |  |  |  |  |  |  |  |  |  |  |  |  |  |  |  |  |  |  |  |  |  |  |  |  |  |  |  |  |  |  |  |  |  |  |  |  |  |  |  |  |  |  |  |  |  |  |  |  |  |  |  |  |  |  |  |  |  |  |  |  |  |  |  |  |  |  |  |  |  |  |  |  |  |  |  |  |  |  |  |  |  |  |  |  |  |  |  |  |  |  |  |  |  |  |  |  |  |  |  |  |  |  |  |  |  |  |  |  |  |  |  |  |  |  |  |  |  |  |  |  |  |  |  |  |  |  |  |  |  |  |  |  |  |  |  |  |  |  |  |  |  |  |  |  |  |  |  |  |  |  |  |  |  |  |  |  |  |  |  |  |  |  |  |  |  |  |  |  |  |  |  |  |  |  |  |  |  |  |  |  |  |  |  |  |  |  |  |  |  |  |  |  |  |  |  |  |  |  |  |  |  |  |  |  |  |  |  |  |  |  |  |  |  |  |  |  |  |  |  |  |  |  |  |  |  |  |  |  |  |  |  |  |  |  |  |  |  |  |  |  |  |  |  |  |  |  |  |  |  |  |  |  |  |  |  |  |  |  |  |  |  |  |  |  |  |  |  |  |  |  |  |  |  |  |  |  |  |  |  |  |  |  |  |  |  |  |  |  |  |  |  |  |  |  |  |  |  |  |  |  |  |  |  |  |  |  |  |  |  |  |  |  |  |  |  |  |  |  |  |  |  |  |  |  |  |  |  |  |  |  |  |  |  |  |  |  |  |  |  |  |  |  |  |  |  |  |  |  |  |  |  |  |  |  |  |  |  |  |  |  |  |  |  |  |  |  |  |  |  |  |  |  |  |  |  |  |  |  |  |  |  |  |  |  |  |  |  |  |  |  |  |  |  |  |  |  |  |  |  |  |  |  |  |  |  |  |  |  |  |  |  |  |  |  |  |  |  |  |  |  |  |  |  |  |  |  |  |  |  |  |  |  |  |  |  |  |  |  |  |  |  |  |  |  |  |  |  |  |  |  |  |  |  |  |  |  |  |  |  |  |  |  |  |  |  |  |  |  |  |  |  |  |  |  |  |  |  |  |  |  |  |  |  |  |  |  |  |  |  |  |  |  |  |  |  |  |  |  |  |  |  |  |  |  |  |  |  |  |  |  |  |  |  |  |  |  |  |  |  |  |  |  |  |  |  |  |  |  |  |  |  |  |  |  |  |  |  |  |  |  |  |  |  |  |  |  |  |  |  |  |  |  |  |  |  |  |  |  |  |  |  |  |  |  |  |    |
|--|--|--|--|--|--|--|--|--|--|--|--|--|--|--|--|--|--|--|--|--|--|--|--|--|--|--|--|--|--|--|--|--|--|--|--|--|--|--|--|--|--|--|--|--|--|--|--|--|--|--|--|--|--|--|--|--|--|--|--|--|--|--|--|--|--|--|--|--|--|--|--|--|--|--|--|--|--|--|--|--|--|--|--|--|--|--|--|--|--|--|--|--|--|--|--|--|--|--|--|--|--|--|--|--|--|--|--|--|--|--|--|--|--|--|--|--|--|--|--|--|--|--|--|--|--|--|--|--|--|--|--|--|--|--|--|--|--|--|--|--|--|--|--|--|--|--|--|--|--|--|--|--|--|--|--|--|--|--|--|--|--|--|--|--|--|--|--|--|--|--|--|--|--|--|--|--|--|--|--|--|--|--|--|--|--|--|--|--|--|--|--|--|--|--|--|--|--|--|--|--|--|--|--|--|--|--|--|--|--|--|--|--|--|--|--|--|--|--|--|--|--|--|--|--|--|--|--|--|--|--|--|--|--|--|--|--|--|--|--|--|--|--|--|--|--|--|--|--|--|--|--|--|--|--|--|--|--|--|--|--|--|--|--|--|--|--|--|--|--|--|--|--|--|--|--|--|--|--|--|--|--|--|--|--|--|--|--|--|--|--|--|--|--|--|--|--|--|--|--|--|--|--|--|--|--|--|--|--|--|--|--|--|--|--|--|--|--|--|--|--|--|--|--|--|--|--|--|--|--|--|--|--|--|--|--|--|--|--|--|--|--|--|--|--|--|--|--|--|--|--|--|--|--|--|--|--|--|--|--|--|--|--|--|--|--|--|--|--|--|--|--|--|--|--|--|--|--|--|--|--|--|--|--|--|--|--|--|--|--|--|--|--|--|--|--|--|--|--|--|--|--|--|--|--|--|--|--|--|--|--|--|--|--|--|--|--|--|--|--|--|--|--|--|--|--|--|--|--|--|--|--|--|--|--|--|--|--|--|--|--|--|--|--|--|--|--|--|--|--|--|--|--|--|--|--|--|--|--|--|--|--|--|--|--|--|--|--|--|--|--|--|--|--|--|--|--|--|--|--|--|--|--|--|--|--|--|--|--|--|--|--|--|--|--|--|--|--|--|--|--|--|--|--|--|--|--|--|--|--|--|--|--|--|--|--|--|--|--|--|--|--|--|--|--|--|--|--|--|--|--|--|--|--|--|--|--|--|--|--|--|--|--|--|--|--|--|--|--|--|--|--|--|--|--|--|--|--|--|--|--|--|--|--|--|--|--|--|--|--|--|--|--|--|--|--|--|--|--|--|--|--|--|--|--|--|--|--|--|--|--|--|--|--|--|--|--|--|--|--|--|--|--|--|--|--|--|--|--|--|--|--|--|--|--|--|--|--|--|--|--|--|--|--|--|--|--|--|--|--|--|--|--|--|--|--|--|--|--|--|--|--|--|--|--|--|--|--|--|--|--|--|--|--|--|--|--|--|--|--|--|--|--|--|--|--|--|--|--|--|--|--|--|--|--|--|--|--|--|--|--|--|--|--|--|--|--|--|--|--|--|--|--|--|--|--|--|--|--|--|--|--|--|--|--|--|--|--|--|--|--|--|--|--|--|--|--|--|--|--|--|--|--|--|--|--|--|--|--|--|--|--|--|--|--|--|--|--|--|--|--|--|--|--|--|--|--|--|--|--|--|--|--|--|--|--|--|--|--|--|--|--|--|--|--|--|--|--|--|--|--|--|--|--|--|--|--|--|--|--|--|--|--|--|--|--|--|--|--|--|--|--|--|--|--|--|--|--|--|--|--|--|--|--|--|--|--|--|--|--|--|--|--|--|--|--|--|--|--|--|--|--|--|--|--|--|--|--|--|--|--|--|--|--|--|--|--|--|--|--|--|--|--|--|--|--|--|--|--|--|--|--|--|--|--|--|--|--|--|--|--|--|--|--|--|--|--|--|--|--|--|--|--|--|--|--|--|--|--|--|--|--|--|--|--|--|--|--|--|--|--|--|--|--|--|--|--|--|--|--|--|--|--|--|--|--|--|--|--|--|--|--|--|--|--|--|--|--|--|--|--|--|--|--|--|--|--|--|--|--|--|--|--|--|--|--|--|--|--|--|--|--|--|--|--|--|--|--|--|--|--|--|--|--|--|--|--|--|--|--|--|--|--|--|--|--|--|--|--|--|--|--|--|--|--|--|--|--|--|--|--|--|--|--|--|--|--|--|--|--|--|--|--|--|--|--|--|--|--|--|--|--|--|--|--|--|--|--|--|--|--|--|--|--|--|--|--|--|--|--|--|--|--|--|--|--|--|--|--|--|--|--|--|--|--|--|--|--|--|--|--|--|--|--|--|--|--|--|--|--|--|--|--|--|--|--|--|--|--|--|--|--|--|--|--|--|--|--|--|--|--|--|--|--|--|--|--|--|--|--|--|--|--|--|--|--|--|--|--|--|--|--|--|--|--|--|--|--|--|--|--|--|--|--|--|--|--|--|--|--|--|--|--|--|--|--|--|--|--|--|--|--|--|--|--|--|--|--|--|--|--|--|--|--|--|--|--|--|--|--|--|--|--|--|--|--|--|--|--|--|--|--|--|--|--|--|--|--|--|--|--|--|--|--|--|--|--|--|--|--|--|--|--|--|--|--|--|--|--|--|--|--|--|--|--|--|--|--|--|--|--|--|--|--|--|--|--|--|--|--|--|--|--|--|--|--|--|--|--|--|--|--|--|--|--|--|--|--|--|--|--|--|--|--|--|--|--|--|--|--|--|--|--|--|--|--|--|--|--|--|--|--|--|--|--|--|--|--|--|--|--|--|--|--|--|--|--|--|--|--|--|--|--|--|--|--|--|--|--|--|--|--|--|--|--|--|--|--|--|--|--|--|--|--|--|--|--|--|--|--|--|--|--|--|--|--|--|--|--|--|--|--|--|--|--|--|--|--|--|--|--|--|--|--|--|--|--|--|--|--|--|--|--|--|--|--|--|--|--|--|--|--|--|--|--|--|--|--|--|--|--|--|--|--|--|--|--|--|--|--|--|--|--|--|--|--|--|--|--|--|--|--|--|--|--|--|--|--|--|--|--|--|--|--|--|--|--|--|--|--|--|--|--|--|--|--|--|--|--|--|--|--|--|--|--|--|--|--|--|--|--|--|--|--|--|--|--|--|--|--|--|--|--|--|--|--|--|--|--|--|--|--|--|--|--|--|--|--|--|--|--|--|--|--|--|--|--|--|--|--|--|--|--|--|--|--|--|--|--|--|--|--|--|--|--|--|--|--|--|--|--|--|--|--|--|--|--|--|--|--|--|--|--|--|--|--|--|--|--|--|--|--|--|--|--|--|--|--|--|--|--|--|--|--|--|--|--|--|--|--|--|--|--|--|--|--|--|--|--|--|--|--|--|--|--|--|--|--|--|--|--|--|--|--|--|--|--|--|--|--|--|--|--|--|--|--|--|--|--|--|--|--|--|--|--|--|--|--|--|--|--|--|--|--|--|--|--|--|--|--|--|--|--|--|--|--|--|--|--|--|--|--|--|--|--|--|--|--|--|--|--|--|--|--|--|--|--|--|--|--|--|--|--|--|--|--|--|--|--|--|--|--|--|--|--|--|--|--|--|--|--|--|--|--|--|--|--|--|--|--|--|--|--|--|--|--|--|--|--|--|--|--|--|--|----|
|  |  |  |  |  |  |  |  |  |  |  |  |  |  |  |  |  |  |  |  |  |  |  |  |  |  |  |  |  |  |  |  |  |  |  |  |  |  |  |  |  |  |  |  |  |  |  |  |  |  |  |  |  |  |  |  |  |  |  |  |  |  |  |  |  |  |  |  |  |  |  |  |  |  |  |  |  |  |  |  |  |  |  |  |  |  |  |  |  |  |  |  |  |  |  |  |  |  |  |  |  |  |  |  |  |  |  |  |  |  |  |  |  |  |  |  |  |  |  |  |  |  |  |  |  |  |  |  |  |  |  |  |  |  |  |  |  |  |  |  |  |  |  |  |  |  |  |  |  |  |  |  |  |  |  |  |  |  |  |  |  |  |  |  |  |  |  |  |  |  |  |  |  |  |  |  |  |  |  |  |  |  |  |  |  |  |  |  |  |  |  |  |  |  |  |  |  |  |  |  |  |  |  |  |  |  |  |  |  |  |  |  |  |  |  |  |  |  |  |  |  |  |  |  |  |  |  |  |  |  |  |  |  |  |  |  |  |  |  |  |  |  |  |  |  |  |  |  |  |  |  |  |  |  |  |  |  |  |  |  |  |  |  |  |  |  |  |  |  |  |  |  |  |  |  |  |  |  |  |  |  |  |  |  |  |  |  |  |  |  |  |  |  |  |  |  |  |  |  |  |  |  |  |  |  |  |  |  |  |  |  |  |  |  |  |  |  |  |  |  |  |  |  |  |  |  |  |  |  |  |  |  |  |  |  |  |  |  |  |  |  |  |  |  |  |  |  |  |  |  |  |  |  |  |  |  |  |  |  |  |  |  |  |  |  |  |  |  |  |  |  |  |  |  |  |  |  |  |  |  |  |  |  |  |  |  |  |  |  |  |  |  |  |  |  |  |  |  |  |  |  |  |  |  |  |  |  |  |  |  |  |  |  |  |  |  |  |  |  |  |  |  |  |  |  |  |  |  |  |  |  |  |  |  |  |  |  |  |  |  |  |  |  |  |  |  |  |  |  |  |  |  |  |  |  |  |  |  |  |  |  |  |  |  |  |  |  |  |  |  |  |  |  |  |  |  |  |  |  |  |  |  |  |  |  |  |  |  |  |  |  |  |  |  |  |  |  |  |  |  |  |  |  |  |  |  |  |  |  |  |  |  |  |  |  |  |  |  |  |  |  |  |  |  |  |  |  |  |  |  |  |  |  |  |  |  |  |  |  |  |  |  |  |  |  |  |  |  |  |  |  |  |  |  |  |  |  |  |  |  |  |  |  |  |  |  |  |  |  |  |  |  |  |  |  |  |  |  |  |  |  |  |  |  |  |  |  |  |  |  |  |  |  |  |  |  |  |  |  |  |  |  |  |  |  |  |  |  |  |  |  |  |  |  |  |  |  |  |  |  |  |  |  |  |  |  |  |  |  |  |  |  |  |  |  |  |  |  |  |  |  |  |  |  |  |  |  |  |  |  |  |  |  |  |  |  |  |  |  |  |  |  |  |  |  |  |  |  |  |  |  |  |  |  |  |  |  |  |  |  |  |  |  |  |  |  |  |  |  |  |  |  |  |  |  |  |  |  |  |  |  |  |  |  |  |  |  |  |  |  |  |  |  |  |  |  |  |  |  |  |  |  |  |  |  |  |  |  |  |  |  |  |  |  |  |  |  |  |  |  |  |  |  |  |  |  |  |  |  |  |  |  |  |  |  |  |  |  |  |  |  |  |  |  |  |  |  |  |  |  |  |  |  |  |  |  |  |  |  |  |  |  |  |  |  |  |  |  |  |  |  |  |  |  |  |  |  |  |  |  |  |  |  |  |  |  |  |  |  |  |  |  |  |  |  |  |  |  |  |  |  |  |  |  |  |  |  |  |  |  |  |  |  |  |  |  |  |  |  |  |  |  |  |  |  |  |  |  |  |  |  |  |  |  |  |  |  |  |  |  |  |  |  |  |  |  |  |  |  |  |  |  |  |  |  |  |  |  |  |  |  |  |  |  |  |  |  |  |  |  |  |  |  |  |  |  |  |  |  |  |  |  |  |  |  |  |  |  |  |  |  |  |  |  |  |  |  |  |  |  |  |  |  |  |  |  |  |  |  |  |  |  |  |  |  |  |  |  |  |  |  |  |  |  |  |  |  |  |  |  |  |  |  |  |  |  |  |  |  |  |  |  |  |  |  |  |  |  |  |  |  |  |  |  |  |  |  |  |  |  |  |  |  |  |  |  |  |  |  |  |  |  |  |  |  |  |  |  |  |  |  |  |  |  |  |  |  |  |  |  |  |  |  |  |  |  |  |  |  |  |  |  |  |  |  |  |  |  |  |  |  |  |  |  |  |  |  |  |  |  |  |  |  |  |  |  |  |  |  |  |  |  |  |  |  |  |  |  |  |  |  |  |  |  |  |  |  |  |  |  |  |  |  |  |  |  |  |  |  |  |  |  |  |  |  |  |  |  |  |  |  |  |  |  |  |  |  |  |  |  |  |  |  |  |  |  |  |  |  |  |  |  |  |  |  |  |  |  |  |  |  |  |  |  |  |  |  |  |  |  |  |  |  |  |  |  |  |  |  |  |  |  |  |  |  |  |  |  |  |  |  |  |  |  |  |  |  |  |  |  |  |  |  |  |  |  |  |  |  |  |  |  |  |  |  |  |  |  |  |  |  |  |  |  |  |  |  |  |  |  |  |  |  |  |  |  |  |  |  |  |  |  |  |  |  |  |  |  |  |  |  |  |  |  |  |  |  |  |  |  |  |  |  |  |  |  |  |  |  |  |  |  |  |  |  |  |  |  |  |  |  |  |  |  |  |  |  |  |  |  |  |  |  |  |  |  |  |  |  |  |  |  |  |  |  |  |  |  |  |  |  |  |  |  |  |  |  |  |  |  |  |  |  |  |  |  |  |  |  |  |  |  |  |  |  |  |  |  |  |  |  |  |  |  |  |  |  |  |  |  |  |  |  |  |  |  |  |  |  |  |  |  |  |  |  |  |  |  |  |  |  |  |  |  |  |  |  |  |  |  |  |  |  |  |  |  |  |  |  |  |  |  |  |  |  |  |  |  |  |  |  |  |  |  |  |  |  |  |  |  |  |  |  |  |  |  |  |  |  |  |  |  |  |  |  |  |  |  |  |  |  |  |  |  |  |  |  |  |  |  |  |  |  |  |  |  |  |  |  |  |  |  |  |  |  |  |  |  |  |  |  |  |  |  |  |  |  |  |  |  |  |  |  |  |  |  |  |  |  |  |  |  |  |  |  |  |  |  |  |  |  |  |  |  |  |  |  |  |  |  |  |  |  |  |  |  |  |  |  |  |  |  |  |  |  |  |  |  |  |  |  |  |  |  |  |  |  |  |  |  |  |  |  |  |  |  |  |  |  |  |  |  |  |  |  |  |  |  |  |  |  |  |  |  |  |  |  |  |  |  |  |  |  |  |  |  |  |  |  |  |  |  |  |  |  |  |  |  |  |  |  |  |  |  |  |  |  |  |  |  |  |  |  |  |  |  |  |  |  |  |  |  |  |  |  |  |  |  |  |  |  |  |  |  |  |  |  |  |  |  |  |  |  |  |  |  |  |  |  |  |  |  |  |  |  |  |  |  |  |  |  |  |  |  |  |  |  |  |  |  |  |  |  |  |  |  |  |  |  |  |  |  |  |  |  |  |  |  |  |  |  |  |  |  | </ |
|--|--|--|--|--|--|--|--|--|--|--|--|--|--|--|--|--|--|--|--|--|--|--|--|--|--|--|--|--|--|--|--|--|--|--|--|--|--|--|--|--|--|--|--|--|--|--|--|--|--|--|--|--|--|--|--|--|--|--|--|--|--|--|--|--|--|--|--|--|--|--|--|--|--|--|--|--|--|--|--|--|--|--|--|--|--|--|--|--|--|--|--|--|--|--|--|--|--|--|--|--|--|--|--|--|--|--|--|--|--|--|--|--|--|--|--|--|--|--|--|--|--|--|--|--|--|--|--|--|--|--|--|--|--|--|--|--|--|--|--|--|--|--|--|--|--|--|--|--|--|--|--|--|--|--|--|--|--|--|--|--|--|--|--|--|--|--|--|--|--|--|--|--|--|--|--|--|--|--|--|--|--|--|--|--|--|--|--|--|--|--|--|--|--|--|--|--|--|--|--|--|--|--|--|--|--|--|--|--|--|--|--|--|--|--|--|--|--|--|--|--|--|--|--|--|--|--|--|--|--|--|--|--|--|--|--|--|--|--|--|--|--|--|--|--|--|--|--|--|--|--|--|--|--|--|--|--|--|--|--|--|--|--|--|--|--|--|--|--|--|--|--|--|--|--|--|--|--|--|--|--|--|--|--|--|--|--|--|--|--|--|--|--|--|--|--|--|--|--|--|--|--|--|--|--|--|--|--|--|--|--|--|--|--|--|--|--|--|--|--|--|--|--|--|--|--|--|--|--|--|--|--|--|--|--|--|--|--|--|--|--|--|--|--|--|--|--|--|--|--|--|--|--|--|--|--|--|--|--|--|--|--|--|--|--|--|--|--|--|--|--|--|--|--|--|--|--|--|--|--|--|--|--|--|--|--|--|--|--|--|--|--|--|--|--|--|--|--|--|--|--|--|--|--|--|--|--|--|--|--|--|--|--|--|--|--|--|--|--|--|--|--|--|--|--|--|--|--|--|--|--|--|--|--|--|--|--|--|--|--|--|--|--|--|--|--|--|--|--|--|--|--|--|--|--|--|--|--|--|--|--|--|--|--|--|--|--|--|--|--|--|--|--|--|--|--|--|--|--|--|--|--|--|--|--|--|--|--|--|--|--|--|--|--|--|--|--|--|--|--|--|--|--|--|--|--|--|--|--|--|--|--|--|--|--|--|--|--|--|--|--|--|--|--|--|--|--|--|--|--|--|--|--|--|--|--|--|--|--|--|--|--|--|--|--|--|--|--|--|--|--|--|--|--|--|--|--|--|--|--|--|--|--|--|--|--|--|--|--|--|--|--|--|--|--|--|--|--|--|--|--|--|--|--|--|--|--|--|--|--|--|--|--|--|--|--|--|--|--|--|--|--|--|--|--|--|--|--|--|--|--|--|--|--|--|--|--|--|--|--|--|--|--|--|--|--|--|--|--|--|--|--|--|--|--|--|--|--|--|--|--|--|--|--|--|--|--|--|--|--|--|--|--|--|--|--|--|--|--|--|--|--|--|--|--|--|--|--|--|--|--|--|--|--|--|--|--|--|--|--|--|--|--|--|--|--|--|--|--|--|--|--|--|--|--|--|--|--|--|--|--|--|--|--|--|--|--|--|--|--|--|--|--|--|--|--|--|--|--|--|--|--|--|--|--|--|--|--|--|--|--|--|--|--|--|--|--|--|--|--|--|--|--|--|--|--|--|--|--|--|--|--|--|--|--|--|--|--|--|--|--|--|--|--|--|--|--|--|--|--|--|--|--|--|--|--|--|--|--|--|--|--|--|--|--|--|--|--|--|--|--|--|--|--|--|--|--|--|--|--|--|--|--|--|--|--|--|--|--|--|--|--|--|--|--|--|--|--|--|--|--|--|--|--|--|--|--|--|--|--|--|--|--|--|--|--|--|--|--|--|--|--|--|--|--|--|--|--|--|--|--|--|--|--|--|--|--|--|--|--|--|--|--|--|--|--|--|--|--|--|--|--|--|--|--|--|--|--|--|--|--|--|--|--|--|--|--|--|--|--|--|--|--|--|--|--|--|--|--|--|--|--|--|--|--|--|--|--|--|--|--|--|--|--|--|--|--|--|--|--|--|--|--|--|--|--|--|--|--|--|--|--|--|--|--|--|--|--|--|--|--|--|--|--|--|--|--|--|--|--|--|--|--|--|--|--|--|--|--|--|--|--|--|--|--|--|--|--|--|--|--|--|--|--|--|--|--|--|--|--|--|--|--|--|--|--|--|--|--|--|--|--|--|--|--|--|--|--|--|--|--|--|--|--|--|--|--|--|--|--|--|--|--|--|--|--|--|--|--|--|--|--|--|--|--|--|--|--|--|--|--|--|--|--|--|--|--|--|--|--|--|--|--|--|--|--|--|--|--|--|--|--|--|--|--|--|--|--|--|--|--|--|--|--|--|--|--|--|--|--|--|--|--|--|--|--|--|--|--|--|--|--|--|--|--|--|--|--|--|--|--|--|--|--|--|--|--|--|--|--|--|--|--|--|--|--|--|--|--|--|--|--|--|--|--|--|--|--|--|--|--|--|--|--|--|--|--|--|--|--|--|--|--|--|--|--|--|--|--|--|--|--|--|--|--|--|--|--|--|--|--|--|--|--|--|--|--|--|--|--|--|--|--|--|--|--|--|--|--|--|--|--|--|--|--|--|--|--|--|--|--|--|--|--|--|--|--|--|--|--|--|--|--|--|--|--|--|--|--|--|--|--|--|--|--|--|--|--|--|--|--|--|--|--|--|--|--|--|--|--|--|--|--|--|--|--|--|--|--|--|--|--|--|--|--|--|--|--|--|--|--|--|--|--|--|--|--|--|--|--|--|--|--|--|--|--|--|--|--|--|--|--|--|--|--|--|--|--|--|--|--|--|--|--|--|--|--|--|--|--|--|--|--|--|--|--|--|--|--|--|--|--|--|--|--|--|--|--|--|--|--|--|--|--|--|--|--|--|--|--|--|--|--|--|--|--|--|--|--|--|--|--|--|--|--|--|--|--|--|--|--|--|--|--|--|--|--|--|--|--|--|--|--|--|--|--|--|--|--|--|--|--|--|--|--|--|--|--|--|--|--|--|--|--|--|--|--|--|--|--|--|--|--|--|--|--|--|--|--|--|--|--|--|--|--|--|--|--|--|--|--|--|--|--|--|--|--|--|--|--|--|--|--|--|--|--|--|--|--|--|--|--|--|--|--|--|--|--|--|--|--|--|--|--|--|--|--|--|--|--|--|--|--|--|--|--|--|--|--|--|--|--|--|--|--|--|--|--|--|--|--|--|--|--|--|--|--|--|--|--|--|--|--|--|--|--|--|--|--|--|--|--|--|--|--|--|--|--|--|--|--|--|--|--|--|--|--|--|--|--|--|--|--|--|--|--|--|--|--|--|--|--|--|--|--|--|--|--|--|--|--|--|--|--|--|--|--|--|--|--|--|--|--|--|--|--|--|--|--|--|--|--|--|--|--|--|--|--|--|--|--|--|--|--|--|--|--|--|--|--|--|--|--|--|--|--|--|--|--|--|--|--|--|--|--|--|--|--|--|--|--|--|--|--|--|--|--|--|--|--|--|--|--|--|--|--|--|--|--|--|--|--|--|--|--|--|--|--|--|--|--|--|--|--|--|--|--|--|--|--|--|--|--|--|--|--|--|--|--|--|--|--|--|--|--|--|--|--|--|--|--|--|--|--|----|



|                         |      |                                   |                                             |     |                                               |                         |                                                                                                                                     |                                                                         |   |   |   |                                                 |                                                                                 |                                                              |                                      |                                                                                        |                                                                                                                                                                                                    |                                               |                                                           |   |                                                                                                                                                                              |
|-------------------------|------|-----------------------------------|---------------------------------------------|-----|-----------------------------------------------|-------------------------|-------------------------------------------------------------------------------------------------------------------------------------|-------------------------------------------------------------------------|---|---|---|-------------------------------------------------|---------------------------------------------------------------------------------|--------------------------------------------------------------|--------------------------------------|----------------------------------------------------------------------------------------|----------------------------------------------------------------------------------------------------------------------------------------------------------------------------------------------------|-----------------------------------------------|-----------------------------------------------------------|---|------------------------------------------------------------------------------------------------------------------------------------------------------------------------------|
| 126.<br>Moest et al     | 2017 | Ligature, sub-marginal            | Cotton                                      | NA  | Every 3w                                      | 2m                      | Ligatures around all implants                                                                                                       | -                                                                       | - | - | - | -                                               | -                                                                               | -                                                            | 60                                   | Not measured                                                                           | -                                                                                                                                                                                                  | -                                             | -                                                         | - | No implants lost                                                                                                                                                             |
| 127.<br>Ramos et al     | 2017 | Ligature, around healing abutment | Silk, Ethicon                               | 3-0 | Only replaced when missing at weekly controls | 8w                      | Ligatures around all implants                                                                                                       | -                                                                       | - | - | - | -                                               | -                                                                               | -                                                            | 56                                   | Not measured at ligature removal, but first after 6w of additional plaque accumulation | -                                                                                                                                                                                                  | -                                             | -                                                         | - | 3 implants failed to osseointegrate, 5 lost during PI induction, 1 lost during histological processing 3 RBT and 1 LM implants lost due to instability at abutment placement |
| 128.<br>Rodriguez et al | 2017 | Ligature, sub-marginal            | Metal wire                                  | NA  | No                                            | 12w                     | Ligatures around all implants                                                                                                       | -                                                                       | - | - | - | Crestal bone loss and histological pocket depth | Ground sections. Light microscopy. Inflammatory infiltrate, CT fiber attachment | -                                                            | 84                                   | Laser-microtextured implants: 1,95<br>Resorbable blast textured implants: 2,72         | -                                                                                                                                                                                                  | Histo. Mean of mesial and distal measurements | -                                                         | - | -                                                                                                                                                                            |
| 129.<br>Wong et al      | 2017 | Ligature, sub-marginal            | Silk (P:B:N: Medical, Støløse, Denmark)     | 6-0 | No                                            | 4w                      | No ligature                                                                                                                         | General description of degree of soft tissue edema.                     | - | - | - | Micro-CT                                        | -                                                                               | Decalcified sections. Osteoclasts counted, collagen assessed | -                                    | 14                                                                                     | "ligature Implants: 0,431±0,019<br>non-ligature implant: 0,218±0,012"                                                                                                                              | -                                             | Micro-ct. Average of 4 measurements per implant           | - | -                                                                                                                                                                            |
| 130. Yu et al           | 2017 | Ligature, sub-marginal            | Silk (Fischer Scientific, Waltham, MA, USA) | 7-0 | No                                            | 2w                      | 5 wild type mice killed directly after implantation, another 5 after 4w healing and 5 + 2 Tlr2-knock out after 6w post implantation | -                                                                       | - | - | - | Micro-CT                                        | -                                                                               | Decalcified sections                                         | PCR analysis of palatal soft tissues | 14                                                                                     | "Wild type (n = 41 implants) lost: 15<br>Loose: 4<br>Integrated: 22 see Fig 2b<br>bone loss vol. Toll like 2 receptor knock out (n=21 implants) Lost: 3<br>Loose: 0<br>Integrated: 18 see fig 2b." | -                                             | Micro-CT                                                  | - | -                                                                                                                                                                            |
| 131.<br>Hiyari et al    | 2018 | Ligature, sub-marginal            | Silk                                        | 6-0 | No                                            | 1w and 4w respectively  | No ligature                                                                                                                         | Presence or absence of implants, mobility. No difference between groups | - | - | - | Micro-CT                                        | -                                                                               | Undecalcified ground sections and decalcified sections       | -                                    | 7 and 28                                                                               | Volume of circumferential bone loss in fig 1 D and E. Significant difference between strains                                                                                                       | -                                             | Micro-CT                                                  | - | -                                                                                                                                                                            |
| 132.<br>Hiyari et al    | 2018 | Ligature, sub-marginal            | Silk                                        | 6-0 | No                                            | 1w, 1m, 3m respectively | No ligature                                                                                                                         | General description of degree of soft tissue edema.                     | - | - | - | Micro-CT                                        | -                                                                               | Undecalcified and decalcified sections                       | -                                    | 7, 30, 90                                                                              | Figure 2c in paper                                                                                                                                                                                 | -                                             | Histological sections, average of mesial and distal sites | - | -                                                                                                                                                                            |
|                         |      |                                   |                                             |     |                                               |                         |                                                                                                                                     |                                                                         |   |   |   |                                                 |                                                                                 |                                                              |                                      |                                                                                        |                                                                                                                                                                                                    |                                               |                                                           |   | Fig. 3<br>Volymetric bone loss less in 3m compared to 1m in implants and in teeth at 1m and 3m                                                                               |



|                       |      |                         |                                                                                                                             |    |                                  |                                                                                                                                                |     |                                                            |                                                                                                  |                                           |    |                                                   |                                     |                                                                                                                                            |                                                      |    |         |                                             |                                                     |                                                             |                                                                                    |                                       |                                                                                                                                                                                          |                  |
|-----------------------|------|-------------------------|-----------------------------------------------------------------------------------------------------------------------------|----|----------------------------------|------------------------------------------------------------------------------------------------------------------------------------------------|-----|------------------------------------------------------------|--------------------------------------------------------------------------------------------------|-------------------------------------------|----|---------------------------------------------------|-------------------------------------|--------------------------------------------------------------------------------------------------------------------------------------------|------------------------------------------------------|----|---------|---------------------------------------------|-----------------------------------------------------|-------------------------------------------------------------|------------------------------------------------------------------------------------|---------------------------------------|------------------------------------------------------------------------------------------------------------------------------------------------------------------------------------------|------------------|
| 3. Cook et al         | 1995 | Dog, Mongrel            | 2 implant surfaces                                                                                                          | 14 | Mandible, implants on both sides | 4 premolars on each side of the mandible                                                                                                       | 2m  | Interquadrant                                              | Cylindrical (Calitec implants)                                                                   | 4x10                                      | Ti | A: Cancellous-structured titanium<br>B: HA-coated | Bone level                          | 6 (3 on each side. 2 implants were not inserted due to anatomical reasons)                                                                 | 2-stage                                              | NA | 8w+0    | NA                                          | NA (although no suprastructure was used)            | 5 days postoperatively                                      | None at the test side. At the time of abutment connection on the control side.     | From abutment surgery to end of study | Weekly brushing                                                                                                                                                                          | d plaque control |
| 4. Persson et al.     | 1996 | Dog, Labrador           | TREATMENT STUDY                                                                                                             | 5  | Mandible                         | PM3, PM4, M1 on both sides of the mandible                                                                                                     | 3m  | Split mouth                                                | Screw type, Brånemark, Nobel Biocare, Göteborg, Sweden                                           | 3,75x10 mm                                | Ti | U                                                 | Bonelevel                           | 6: 3 on each side                                                                                                                          | 2 stage                                              | -  | 3m+3m   | No                                          | -                                                   | 1 month after ligature removal: Amoxicillin 375mg x2 for 3w | (1) After abutment surgery                                                         | (1) 3m                                | (1) tooth and abutment cleaning 3t /w. Monthly cleaning, polishing of implants and teeth and implant scaling with plastic scaler (A) Brushch + 2% CHX daily (B) Brushch+ 2% CHX 3times/w |                  |
| 5. Fritz et al        | 1997 | Monkey (Macaca mulatta) | Plate-from vs root-form implants vs natural teeth                                                                           | 36 | Mandible, both sides             | All mandibular molars                                                                                                                          | 6m  | Comparison between animals                                 | Plate-form Screw-shaped (Osseodent. Collagen Corporation, Palo Alto CA. According to Fritz 1994) | Screw-shaped: 3,75x7 Plate form: 14x7x1,6 | Ti | Na                                                | Bone level                          | 12 natural teeth (2 <sup>nd</sup> molar), 11 plate-form (2 <sup>nd</sup> molar region, 12 root form implants (2 <sup>nd</sup> molar egion) | 2-stage                                              | -  | 6m+12m  | Yes.                                        | Yes, Fixed bridge placed min 3 m after implantation | Penicillin G procaine, 300,000 post operatively             | At the time of suprastructure connection, min 6 months after implant installation  | 12m                                   |                                                                                                                                                                                          |                  |
| 6. Hanisch et al      | 1997 | Monkey, Macaca Mulatta  | Experimental peri-implantitis                                                                                               | 4  | Maxilla and mandible             | All premolars                                                                                                                                  | 3m  | Maxilla vs mandible                                        | Cylindrical                                                                                      | NAx10 Bio-vent Dentsply                   | Ti | HA-coated                                         | Bone level                          | 8: 2 in each quadrant                                                                                                                      | 2-stage                                              | NA | 12m+5m  | No                                          | NA (no suprastructure)                              | NA                                                          | (A) 2m after abutment connection (B) 11m after baseline (1m afterligature removal) | (A) 3m (B) 4w                         |                                                                                                                                                                                          |                  |
| 7. Abrahamsson et al. | 1998 | Dog, Beagle             | 3 implant systems: 1. Astra tech Implants, Dental System. 2. Nobel biocare, Brånemark System. 3. ITI dental implants system | 5  | Mandible                         | All mandibular premolars. (1 <sup>st</sup> 2 <sup>nd</sup> and 3 <sup>rd</sup> maxillary molars also extracted to avoid occlusal interference) | 3m  | One of each fixture in each quadrant in a randomized order | Screw-type                                                                                       | 1: 3,5x8<br>2: 3,75x7<br>3: 4x8           | Ti | 1: NA (TiOblast?)<br>2: NA (TiUnite?)<br>3: TPS   | 1 and 2: Bonelvel<br>3: Tissuelevel | 6                                                                                                                                          | 1-2: 2-stage (submerged)<br>3: 1-stage (tissuelevel) | NA | 3m + 1m | Yes                                         | No                                                  | NA                                                          | After implant installation                                                         | 4m                                    | Daily brushing and dentifrice                                                                                                                                                            |                  |
| 8. Hürzeler et al     | 1998 | Monkey, cynomolgus      | Repetitive mechanical trauma ± ligature                                                                                     | 5  | Mandible                         | All mandibular PM:s and                                                                                                                        | 12w | Ligatures on one side of the mandible                      | Screw shaped                                                                                     | 3,75x7 mm Brånemark                       | Ti | U                                                 | Bone level                          | 8:4 on each side of the mandible                                                                                                           | 2-stage                                              | NA | 16w+4w  | Yes ligature side chosen by flipping a coin | Yes, single crowns                                  | -                                                           | (A) First week after abutment (B) Second week after abutment                       | (A) 1w (B) 3w                         | (A) 2% CHX swabbing 3 times/w                                                                                                                                                            |                  |

|                            |       |                 |                                                                                           |    |                         |                                                    |     |                                                                     |                                                                                                                                               |                                                             |                       |                                                                                                                                                                                                       |             |                       |         |    |           |                                                                                                                                    |                                                                                                     |                                                                                            |                                                                      |                                                                                          |                                                                                                                                                                                                                                                                                                               |
|----------------------------|-------|-----------------|-------------------------------------------------------------------------------------------|----|-------------------------|----------------------------------------------------|-----|---------------------------------------------------------------------|-----------------------------------------------------------------------------------------------------------------------------------------------|-------------------------------------------------------------|-----------------------|-------------------------------------------------------------------------------------------------------------------------------------------------------------------------------------------------------|-------------|-----------------------|---------|----|-----------|------------------------------------------------------------------------------------------------------------------------------------|-----------------------------------------------------------------------------------------------------|--------------------------------------------------------------------------------------------|----------------------------------------------------------------------|------------------------------------------------------------------------------------------|---------------------------------------------------------------------------------------------------------------------------------------------------------------------------------------------------------------------------------------------------------------------------------------------------------------|
|                            |       |                 |                                                                                           |    |                         | M1,<br>M2                                          |     |                                                                     |                                                                                                                                               |                                                             |                       |                                                                                                                                                                                                       |             |                       |         |    |           |                                                                                                                                    |                                                                                                     |                                                                                            |                                                                      |                                                                                          | (B) Brush<br>+ flour of<br>pumice<br>and 2%<br>CHX<br>spray 3<br>times/ w.<br>(A)<br>Brushing,<br>interprox<br>mal<br>brushin<br>and<br>scaling<br>with<br>graphite<br>scaler<br>3t/w. With<br>sedation<br>every 2w<br>when<br>necessary<br>Tooth and<br>abutment<br>cleaning<br>every 2 <sup>nd</sup><br>day |
| 9.<br>Tillman<br>ns et al  | 1998  | Dog,<br>Beagle  | Bone loss<br>around 3<br>different<br>implant<br>systems with<br>and without<br>ligatures | 16 | Mandible                | PM2,<br>PM3,<br>PM4<br>On both<br>sides            | 3m  | Inter-<br>quarant – 1<br>of each<br>implant<br>type on<br>each side | (a) cylindrical<br>(b) cylindrical<br>(c) screw-form                                                                                          | (a)-(c) 4x<br>10 mm                                         | (a)-(c) Ti-<br>6Al-4V | (a) Calcitite HA<br>coating (Sulzer<br>Calcitek, Carlsbad,<br>CA)<br>(b) Commercially<br>pure TPS coating<br>(APS Materials,<br>Dayton OH)<br>(c) Machined Ti-<br>alloy surface<br>(Sulzer, Calcitek) | Bone level  | 6: 3 on each<br>side  | 2-stage | NA | 3m+4w     | YES, one implant of<br>each type randomly<br>placed on each side of<br>the mandible<br><br>Ligature side also<br>randomly selected | No –<br>suprastruct<br>ure on<br>neighbourin<br>g teeth<br>used to<br>prevent<br>implant<br>loading | NA                                                                                         | (A) After<br>abutment surgery                                        | (A) 1m on<br>ligature side.<br>4m on<br>control side<br>(until<br>sacrifice)             |                                                                                                                                                                                                                                                                                                               |
| 10.<br>Persson<br>et al.   | 1999  | Dog,<br>Beagle  | TREATMEN<br>T STUDY                                                                       | 4  | Mandible                | PM1,<br>PM2,<br>PM3,<br>PM4 on<br>each side        | 4m  | Different<br>positions<br>(inter-<br>quadrant)                      | Screw type,<br>Brånemark,<br>Nobel Biocare,<br>Göteborg,<br>Sweden                                                                            | 7 mm<br>leangth                                             | Ti                    | U                                                                                                                                                                                                     | Bonelevel   | 6: 3 on each<br>side  | 2 stage | -  | 4m+2m     | No                                                                                                                                 | -                                                                                                   | 1m after<br>ligature<br>removal,(Ima<br>cillin 250 mg<br>x2) for 3w                        | (1) After<br>abutment surgery                                        | (1) 2m                                                                                   |                                                                                                                                                                                                                                                                                                               |
| 11.<br>Deppe<br>et al      | 2001  | Dog,<br>Beagle  | TREATMEN<br>T STUDY                                                                       | 6  | Mandible,<br>both sides | NS                                                 | NA  | 1 of 3<br>treatment<br>methods in<br>each<br>hemimandib<br>le       | Cylindrical<br>(Frialt 2)                                                                                                                     | 3,8x11                                                      | Ti                    | Ti plasma spray<br>coated                                                                                                                                                                             | Bone Level  | 10 5 on each<br>side) | 2-stage | NA | 3m+4w     | No                                                                                                                                 | NA (no<br>suprastruct<br>ure                                                                        | NA                                                                                         | At abutment<br>connection                                            | 4w                                                                                       | Oral<br>hygiene                                                                                                                                                                                                                                                                                               |
| 12.<br>Persson<br>et al.   | 2001a | Beague<br>dogs  | Turned x SLA<br>surface                                                                   | 4  | Mandible                | 8: 4 each<br>side (1°M,<br>2°PM,<br>3°PM,<br>4°PM) | 12m | Split-mouth                                                         | Screw-type (ITI<br>Straumann,<br>Waldenburg,<br>Switzerland)                                                                                  | 3.3x8.0                                                     | Ti                    | U (left side)<br>SA (right side)                                                                                                                                                                      | Tissuelevel | 6                     | 1 stage | -  | 3m + 0    | No                                                                                                                                 | -                                                                                                   | 5 weeks after<br>removal of<br>ligatures, for<br>17 days                                   | (1) After implant<br>installation; (2) 1<br>month after<br>treatment | (1) 3m<br>(2x/week);<br>(2) 6m                                                           | (1) and (2)<br>Tooth and<br>implant<br>cleaning                                                                                                                                                                                                                                                               |
| 13.<br>Shibuta<br>ni et al | 2001  | Dog,<br>Beagle  | Ligature<br>induced bone<br>loss with-<br>out IV<br>Pamidronate                           | 10 | Mandible                | PM2,<br>PM3 on<br>the left<br>side                 | 6m  | Comparison<br>between<br>animals                                    | Screw shape<br>(TiOblast, Astra<br>Tech AB,<br>Mölnadal,<br>Sweden)<br>Screw-shape<br>(1)                                                     | 3,5x 11<br>mm                                               | Ti                    | TiOblast                                                                                                                                                                                              | Bone-level  | 2 per animal          | 2-stage | NA | 4,5m+3w   | NA                                                                                                                                 | No                                                                                                  | NA                                                                                         | (A) After<br>abutment<br>connection                                  | (A) 3w                                                                                   | (A) Brush<br>and 0,12%<br>CHX rinse<br>1t/ w.                                                                                                                                                                                                                                                                 |
| 14.<br>Shibli et<br>al     | 2003  | Dog,<br>Mongrel | Microbiology<br>and bone loss<br>after ligatures<br>around 4<br>different<br>implants     | 6  | Mandible                | All<br>mandibula<br>r and<br>maxillary<br>PMs      | 3m  | Inter-<br>quadrant                                                  | Commercially<br>pure Ti (3i)<br>(2) TPS (ITI/<br>Straumann,<br>Esthetic plus<br>(3) HA-coated<br>(Calcitek)<br>(4) Hybrid: first<br>3 threads | (1), (3),<br>(4): 3,75 x<br>10 mm<br><br>(2) 4,1 x<br>10 mm | Ti                    | (1) Turned (3i)<br>(2) TPS (ITI/<br>Straumann, Esthetic<br>plus<br>(3) HA-coated<br>(Calcitek)<br>(4) Hybrid: first 3<br>threads machined,<br>the rest acid etched<br>(Osseotite, 3i)                 | Bone-level  | 6: 3 on each<br>side  | 2-stage | NA | 90d + 45d | Yes, at least one<br>implant of each kind<br>in each animal                                                                        | No                                                                                                  | Potassium<br>and sodium<br>benzyl<br>penicillin<br>once/w for<br>2w<br>postoperative<br>ly | (A) 2w before<br>extraction<br><br>(B) After tooth<br>extraction     | (A) at one<br>time<br><br>(B) 225d<br>(until 45<br>days after<br>abutment<br>connection) | (A) Oral<br>hygiene<br><br>(B)<br>Scrubbing<br>with 0,12<br>% CHX<br>daily and<br>scaling<br>and root                                                                                                                                                                                                         |

|                          |      |                 |                                                                                   |   |                                          |                                                                                                                    |    |                                                                                |                                                      |                            |        |                                                                            |                           |                                         |                        |         |                                |                               |                                                                                                 |                                                                                                                                                                                                                                    |                                  |                                                                                   |                                                                                                                     |                 |                   |
|--------------------------|------|-----------------|-----------------------------------------------------------------------------------|---|------------------------------------------|--------------------------------------------------------------------------------------------------------------------|----|--------------------------------------------------------------------------------|------------------------------------------------------|----------------------------|--------|----------------------------------------------------------------------------|---------------------------|-----------------------------------------|------------------------|---------|--------------------------------|-------------------------------|-------------------------------------------------------------------------------------------------|------------------------------------------------------------------------------------------------------------------------------------------------------------------------------------------------------------------------------------|----------------------------------|-----------------------------------------------------------------------------------|---------------------------------------------------------------------------------------------------------------------|-----------------|-------------------|
| 15.<br>Deppe<br>et al    | 2004 | Dog,<br>Beagle  | Assessment of<br>reliability of 3<br>bone<br>attachment<br>measurement<br>methods | 6 | Mandible,<br>both sides                  | NS                                                                                                                 | 3m | Reliability<br>of 2 X-ray<br>methods<br>and<br>pressure-<br>forced<br>probing, | machined, the<br>rest acid etched<br>(Osseotite, 3i) | Cylindrical<br>(Frialit 2) | 3,8x11 | Ti                                                                         | Ti plasma spray<br>coated | Bone level                              | 10 (5 on<br>each side) | 2-stage | NA                             | 12w+4w                        | NA                                                                                              | NA (no<br>suprastruct<br>ure)                                                                                                                                                                                                      | NA                               | At abutment<br>connection                                                         | 4w                                                                                                                  | Oral<br>hygiene | planning<br>1t/m. |
| 16.<br>Martins<br>et al. | 2004 | Dog,<br>Mongrel | 4 surfaces                                                                        | 6 | Mandible                                 | 8<br>premolars<br>(4/side).<br>(maxillary<br>also<br>extracted to avoid<br>occlusal<br>trauma<br>interferen<br>ce) | 3m | ≥ one of<br>each<br>implant in<br>each animal                                  | Screw-type                                           | 3,75x10<br>4,1x10          | Ti     | TPS, HA, U + AE<br>(U in 3 first threads<br>and AE in other<br>threads), U | Bone level                | 6: 3 on each<br>side of the<br>mandible | 2 stage<br>(submerged) | 10      | 3m + 45d                       | No                            | No                                                                                              | 24000 IU/kg<br>benzylpenicil<br>lum 1x/week<br>for 2 weeks<br>after implant<br>placement                                                                                                                                           | Before PI                        | 9,5 (2 weeks<br>before<br>extraction to<br>ligature<br>placement.)                | Daily<br>chlorhexid<br>ine<br>scrubbing<br>+<br>Scaling<br>and root<br>planning<br>1x/month                         |                 |                   |
| 17.<br>Martins<br>et al  | 2005 | Dog,<br>Mongrel | 4 surfaces                                                                        | 6 | Mandible                                 | 8<br>premolars<br>(4/side).<br>(maxillary<br>also<br>extracted to avoid<br>occlusal<br>trauma<br>interferen<br>ce) | 3m | ≥ one of<br>each<br>implant in<br>each animal                                  | Screw-type                                           | 3,75x10<br>4,1x10          | Ti     | TPS, HA, U + AE<br>(U in 3 first threads<br>and AE in other<br>threads), U | Bone level                | 6: 3 on each<br>side of the<br>mandible | 2 stage<br>(submerged) | 10      | 3m + 45d                       | No                            | No                                                                                              | 24000 IU/kg<br>benzylpenicil<br>lum 1x/week<br>for 2 weeks<br>post op (after<br>implant<br>placement –<br><u>OTHERWISE, POST-OP.<br/>OF WHICH SURGERY?<br/>THIS MIGHT BE<br/>CONFUSING FOR THE<br/>READER IF NOT<br/>INDICATED</u> | (A) Before PI<br>(B) After PI    | (A) 9,5 (2<br>weeks before<br>extraction to<br>ligature<br>placement.)<br>(B) 12m | (A) Daily<br>chlorhexid<br>ine<br>scrubbing<br>+<br>Scaling<br>and root<br>planning<br>1x/month<br>(B) same<br>as A |                 |                   |
| 18.<br>Berglund<br>et al | 2007 | Dog,<br>Beagle  | 2 surfaces                                                                        | 5 | Mandible,<br>both<br>premolar<br>regions | All<br>mandibular<br>premolars                                                                                     | 3m | Split mouth                                                                    | Screw shaped.<br>Straumann SP                        | 3,3x8                      | Ti     | Sandblasted Acid<br>Etched<br>Vs<br>Polished                               | Tissue level              | 6                                       | 1-stage                | NA      | 3 months<br>and 2 weeks<br>+ 0 | No                            | No (Not<br>specifically<br>stated, no<br>extraktion<br>of<br>antagonizing<br>teeth<br>reported) | NA                                                                                                                                                                                                                                 | 2w after implant<br>installation | 3m minus 2w                                                                       | Daily<br>cleaning<br>of<br>implants<br>and teeth<br>with<br>toothbrush<br>and 0,12%<br>CHX gel.                     |                 |                   |
| 19.<br>Shibli et<br>al   | 2006 | Dog,<br>Mongrel | TREATMENT<br>STUDY:<br>Lethal<br>photosensitization<br>and GBR                    | 5 | Mandible                                 | All PMs<br>and M1<br>on both<br>sides of                                                                           | 3m | Split mouth                                                                    | Screw shape<br>(1) CpTi<br>Sterngold<br>Implantmed,  | 3,75x10<br>mm              | Ti     | (1)Turned<br>(2) TPS,                                                      | Bone level                | 8: 4 on each<br>side                    | 2-stage                | NA      | 3m+2m                          | Yes according to<br>treatment | No – upper<br>PMs<br>extracted<br>to avoid<br>loading                                           | potassium and<br>sodium<br>benzyl<br>penicillin<br>once/w for                                                                                                                                                                      | (A) After tooth<br>extraction    | (A) until<br>ligature<br>placement                                                | (A)<br>Scrubbing<br>with 0,12<br>% CHX<br>daily and                                                                 |                 |                   |

|     |                   |      |                                                       |                                                 |                                                             |                                                         |                                                                                                                                                                                      |    |                                                               |                                                                                                                                                                                                                                                                                                                                                     |                                                   |    |                                                        |                                    |                                       |         |    |        |                          |                        |    |                               |             |                                            |
|-----|-------------------|------|-------------------------------------------------------|-------------------------------------------------|-------------------------------------------------------------|---------------------------------------------------------|--------------------------------------------------------------------------------------------------------------------------------------------------------------------------------------|----|---------------------------------------------------------------|-----------------------------------------------------------------------------------------------------------------------------------------------------------------------------------------------------------------------------------------------------------------------------------------------------------------------------------------------------|---------------------------------------------------|----|--------------------------------------------------------|------------------------------------|---------------------------------------|---------|----|--------|--------------------------|------------------------|----|-------------------------------|-------------|--------------------------------------------|
| 20. | Albouy et al      | 2008 | Dog, Labrador (same animals as study 6 in this table) | 4 implants/ - surfaces (A, B, C, D)             | 6                                                           | Mandible, right side                                    | 12 (All mandibular premolars and the three anterior premolars in the maxilla on both sides)<br>6 (All mandibular premolars and the 3 anterior premolars in the maxilla on one side.) | 3m | Interquadrant: One of each implant type in the same quadrant  | Attleboro, MA, USA)<br>(2) TPS, Sterngold...<br>(3) Hybrid – machined in first 3 screws and then acid etched (3i Osseotite, Implants Innovations<br>(4) Sandblasted with ti oxide Porous, Conexao Implants...<br>Screw type<br>A: Biomet 3i ICE Micro miniimplant<br>B: Astra Tech MicroThreaded<br>C: Straumann SP NN<br>D: Nobel Biocare MKIII NP | A: 2,35x10<br>B: 3,5x11<br>C: 3,3x10<br>D: 3,3x10 | Ti | A: U<br>B: TiOblast<br>C: Sandblasted AE<br>D: TiUnite | A,B,D: Bonelevel<br>C: Tissuelevel | 4 (all in 1 quadrant)                 | 1-stage | NA | 3m + 0 | Yes                      | No                     | NA | 2w after implant installation | 3m minus 2w | Daily cleaning of implants                 |
| 21. | Albouy et al      | 2012 | Dog, Labrador                                         | 2 surfaces                                      | 5 according to abstract, 6 according to material and method | Mandible, one side                                      | PM1<br>PM2<br>PM3<br>PM4<br>M1<br>On both sides of the mandible                                                                                                                      | 3m | Interquadrant: One of each in one side of the mandible        | Screw type (Brånemark MKIII narrow platform)                                                                                                                                                                                                                                                                                                        | 3,3x10                                            | Ti | Turned, TiUnite                                        | Bone level                         | 2                                     | 1-stage | NA | 3m + 0 | Yes                      | No                     | NA | 2w after implant installation | 3m minus 2w | Daily cleaning of implants                 |
| 22. | López-Piriz et al | 2012 | Dog, Beagle                                           | Soda-lime-glass/ Ag abutment coating vs control | 5                                                           | Mandible                                                | PM1<br>PM2<br>PM3<br>PM4<br>M1<br>On both sides of the mandible                                                                                                                      | 3m | Interquadrant: Test implants at all central and distal sites. | Screw shaped Phibo dental solutions                                                                                                                                                                                                                                                                                                                 | NA                                                | Ti | ?                                                      | Bone level                         | 6: 3 on each side of the mandible     | 2-stage | NA | 2m+    | No                       | NA (no suprastructure) | No | (A) After abutment connection | (A)4w       | (A) Toothbrush and dentifrice 5d/w         |
| 23. | Carcuac et al     | 2013 | Dog, Labrador (same animals as study                  | Teeth vs implants/ 2 implant surfaces           | 6 according to material and method, 5                       | Mandible, implants on the right side, teeth on the left | Right mandibular premolars and first                                                                                                                                                 | 3m | Split mouth (IMPLANTS VS TEETH)                               | Screw shaped Nobel Biocare MKIII, NP                                                                                                                                                                                                                                                                                                                | 3,3x10                                            | Ti | A: Turned<br>B: TiUnite                                | Bone level                         | 4 (On the right side of the mandible) | 1-stage | NA | 3+0    | Yes – Pairwise placement | No                     | NA | 2w after implant installation | 3m minus 2w | Tooth and abutment cleaning 3 times a week |

|     |                 |      |               |                                                                                 |   |                      |                                                                                                     |     |                                                                                                                         |                                                                                             |                                                       |    |                                                                                                          |                                         |                                                      |                     |    |          |                                                                                      |    |                                                      |                                                                                             |                                      |                                                                                                                                                  |
|-----|-----------------|------|---------------|---------------------------------------------------------------------------------|---|----------------------|-----------------------------------------------------------------------------------------------------|-----|-------------------------------------------------------------------------------------------------------------------------|---------------------------------------------------------------------------------------------|-------------------------------------------------------|----|----------------------------------------------------------------------------------------------------------|-----------------------------------------|------------------------------------------------------|---------------------|----|----------|--------------------------------------------------------------------------------------|----|------------------------------------------------------|---------------------------------------------------------------------------------------------|--------------------------------------|--------------------------------------------------------------------------------------------------------------------------------------------------|
| 24. | Madi et al      | 2013 | Dog, Beagle   | Experimental PI at different implant surfaces                                   | 6 | Mandible             | PM1<br>PM2<br>PM3<br>PM4<br>On both sides of the mandible                                           | 3m  | Interquadrant, anterior-posterior randomized fashion                                                                    | 3 screw shaped and 1 cylindrical - the (4) HA plasma-sprayed+pressurized                    | 3,3x10 mm (screw shaped) and 3,25x10 mm (cylindrical) | Ti | (1) Machined<br>(2) Sandblasted, acid-etched<br>(3) Sputter HA-coat<br>(4) HA plasma-sprayed+pressurized | Bone level                              | 8: 4 on each side of the mandible                    | 1-stage             | NA | 0+3m     | YES, implants placed in a randomized order                                           | No | Metronidazole 11mg/kg postoperatively for three days | (A) 2w after implant placement                                                              | (A) 3m                               | (A) 2% CHX rinse 3t/w+scaling 1t/m                                                                                                               |
| 25. | Martinez et al  | 2014 | Dog, Beagle   | Soda lime glass coated abutments with silver Nano-particles                     | 5 | Mandible             | PM1<br>PM2<br>PM3<br>PM4<br>M1<br>On both sides of the mandible                                     | 12w | Inter-quadrant: Mesial implant as control, 2 distal ones as test                                                        | Screw shaped (Phibo dental solutions, Barcelona, Spain)                                     | 3,75x11,5                                             | Ti | NA                                                                                                       | Bone level                              | 6: 3 on each side of the mandible                    | 2-stage             | NA | 2m+4w    | No                                                                                   | No | No                                                   | (A) After abutment connection                                                               | (A) 4w                               | (A) brush and dentifrice 5d/w                                                                                                                    |
| 26. | Carcuac et al   | 2015 | Dog, labrador | TREATMENT STUDY 4 implants/ surfaces. CHX vs Saline                             | 6 | Mandible, both sides | All mandibular premolars. 1 <sup>st</sup> , 2 <sup>nd</sup> and 3 <sup>rd</sup> maxillary premolars | 3m  | Split mouth (CHX vs SALINE) Inter-quadrant (4 surfaces)                                                                 | Screw shaped. A, B, and C: Astra Tech Implant system. D: Nobel Biocare.                     | A,B,C: 3,5x11 D: 3,3x11,5                             | Ti | A: TiOblast<br>B: Osseospeed<br>C: AT-I<br>D: TiUnite                                                    | Bone level                              | 8 (4 on each side of the mandible)                   | 1-stage             | NA | 3+0      | Yes – identical placementsequence on both sides but randomized sequence between dogs | No | NA                                                   | 2w after implant installation                                                               | 3m minus 2w                          | Plaque control 3 times a week                                                                                                                    |
| 27. | Huang et al     | 2015 | Dog, Beagle   | Bone defect configuration depending on implant placement depth and implant type | 6 | Mandible             | PM2, PM3, PM4, M1 on both sides of the mandible                                                     | 8w  | Interquadrant: 2 of each implant type. 1 of each implant type placed 1,5 mm sub-crestally and the other 2 at bone level | Screw-type (OsseoSpeed, (A) Astra, Mölndal, Sweden and (B) Integra-CP. Bicon, Boston, USA I | (A)&(B) 3,5x8                                         | Ti | (A) Fluoride modified TiOblast<br>(B) Plasma-sprayed calcium-phosphate                                   | Bone level and 1,5 mm sub-crestal level | 4 on the left side, total of 24 implant in the study | 2-stage             | NA | 12w+4w   | Yes                                                                                  | No | For 7d after extractions.                            | (1) After tooth extraction<br>(2) After implant insertion<br>(3) 10d after abutment surgery | (1) 1w<br>(2) 1w<br>(3) 4w minus 10d | (1) & (2) Cleaning with 0,12% CHX solution<br>(3) 0,12% CHX irrigation every 2 <sup>nd</sup> day initially, then brush every 2 <sup>nd</sup> day |
| 28. | Namgoong et al. | 2015 | Beagle dogs   | 3 surfaces: U, SA, SA/HA                                                        | 5 | Mandible             | 10: 5 each side (1°PM, 2°PM, 3°PM, 4°PM, 1°M)                                                       | 12w | Split-mouth                                                                                                             | Screw-type (Osstem, Busan, Korea)                                                           | 3.0x8.5                                               | Ti | U, SA, SA/HA                                                                                             | Bonelevel (1 mm subcrestally)           | 3                                                    | 2 stage (submerged) | NA | 12w + 2w | Yes                                                                                  | No | NP                                                   | During implant healing: toothbrush 2x/w for 12w. Post-op.: NP                               | 12w pre-op.                          | toothbrush                                                                                                                                       |

|                          |      |                      |                                                                                             |                      |          |                                                                           |                                           |                                                                                              |                                                                 |                       |    |                                                                                                                       |              |                                    |                                  |                           |                               |                               |                           |                                                                                       |                                                                 |                   |                                                              |
|--------------------------|------|----------------------|---------------------------------------------------------------------------------------------|----------------------|----------|---------------------------------------------------------------------------|-------------------------------------------|----------------------------------------------------------------------------------------------|-----------------------------------------------------------------|-----------------------|----|-----------------------------------------------------------------------------------------------------------------------|--------------|------------------------------------|----------------------------------|---------------------------|-------------------------------|-------------------------------|---------------------------|---------------------------------------------------------------------------------------|-----------------------------------------------------------------|-------------------|--------------------------------------------------------------|
| 29. López-Piriz et al    | 2015 | Dog, Beagle          | 3 different antimicrobial glassy coated abutments effect on bacteria, biofilm and bone loss | 5                    | Mandible | All Ms and PMs on both sides of the mandible                              | 3m                                        | Inter-quadrant:<br>(1)control<br>(2) ZnO-glassy<br>(3) G3 glassy coating<br>(4) n-Ag coating | Screw shaped SEVEN, MIS                                         | NA                    | Ti | ?                                                                                                                     | Bone level   | 8; 4 on each side of the mandible  | 2-stage                          | NA                        | 8w+                           | No                            | NA (No suprastructure)    | NA                                                                                    | (A) After abutment connection                                   | (A)4w             | (A) Toothbrush and dentifrice 5d/w                           |
| 30. Pirih et al          | 2015 | Mice, C57BL/6 J male | Ligature (10 mice) vs control (8 mice)                                                      | 18                   | Maxilla  | 3: M1, M2, M3 on the left side                                            | 8w                                        | Comparison between animals                                                                   | Screw type (G. Hartzell and Son, Concord, CA, USA)              | 0,5x1                 | Ti | U                                                                                                                     | Tissuelevel  | 1                                  | 1 stage                          | -                         | 4w+0                          | Yes, toss of a coin           | No                        | For 4w aft tooth extractions/ implant surgery respectively. Diluted in drinking water | No                                                              | No                | No                                                           |
| 31. Ishii et al          | 2016 | Dog, Beagle          | UV-light irradiated SLA-surface vs conventional SLA-surface                                 | 3                    | Mandible | PM2, PM3, PM4 on both sides                                               | 0m immediate post extraction implantation | Split mouth                                                                                  | Screw shaped                                                    | 3,3x8 mm Straumann SP | Ti | SLA (sandblasted + AE)                                                                                                | Bone level   | 4: 2 on each side of the mandible  | 1-stage                          | NA                        | 90d+0d                        | No                            | No                        | -                                                                                     | (A) After implant surgery                                       | (A) 90d           | (A) 0,12% CHX                                                |
| 32. Godoy-Gallardo et al | 2016 | Dog, Beagle          | Implants with 3 surfaces: Ti, Ti_Ag Ti-TSP                                                  | 5                    | Mandible | All PMs on both sides of the mandible                                     | 3m                                        | Inter-quadrant                                                                               | Screw-type (Soadco S.A., Escaldes-Engordany, Andorra)           | 3,5x8 mm              | Ti | Ti-group: Sandblasted and acid etched<br>Ti-Ag: same + silver electrodeposition<br>Ti-Tsp: same + TESPA sinlanisation | Tissue level | 6: 3 on each side                  | 1-stage                          | Min 3 mm between implants | 2m+0                          | Yes, random implant placement | NA-no suprastructure      | Amoxicillin post op.                                                                  | (A) After implant insertion.<br>(B) 10d after implant insertion | (A) 10d<br>(B) 2m | (A) cleanin with CHX on gauze.<br>(B) Brusch with CHX 3t/ w. |
| 33. Park et al.          | 2017 | Beagle dogs          | Immediate vs. delayed implantation                                                          | 4                    | Mandible | 6: 3 each side (3°PM, 4°PM, 1°M)<br>All PMs on both sides of the mandible | 0 (3°PM) and 3m (4°PM)                    | Split-mouth                                                                                  | Screw-type (TSIII SA fixture; Osstem, Seoul, Republic of Korea) | 3.5x8.5               | Ti | SB/AE                                                                                                                 | Tissuelevel  | 4                                  | 1 stage (3°PM)<br>2 stage (4°PM) | NA                        | 0 + 0 (3°PM)<br>3m + 0 (4°PM) | No                            | No                        | After GBR (3d)                                                                        | 2w after ligature removal                                       | Only once         | Dental water jet + flossing                                  |
| 34. Lin et al            | 2017 | Dog, Beagle          | Stainless steel ligature investigated                                                       | 6                    | Mandible | All PMs on both sides of the mandible                                     | 4w                                        | Ligatures around all implants                                                                | Screw-type (Straumann tissue levele)                            | 3,3x8 mm              | Ti | Sand blasted and acid etched (SLA)                                                                                    | Tissue level | 6: 3 on each side, tot 36          | 1-stage                          | NA                        | 12w+0                         | No                            | NA-no suprastructure used | 30 min before all surgical treatment                                                  | (A) after abutment connection                                   | (A) 12w           | (A) brusch 2t/w                                              |
| 35. Koutouzis et al      | 2017 | Rat, Wistar          | Polymicrobial inocula by gingival lavage vs sham                                            | 12 (5 were analyzed) | Maxilla  | M1, on both sides                                                         | 1m                                        | Comparison between animals                                                                   | Screw-type custom made                                          | 1,5x2                 | Ti | Turned                                                                                                                | Bone level   | 2: one on each side of the maxilla | 2-stage                          | -                         | 2m+1w                         | No                            | No                        | Yes, before for 4 consecutive days prior to inoculation                               | (A) Prior to inoculation                                        | (A) 4d            | (A) CHX swabbing                                             |

Ti = titanium; TPS = titanium plasma sprayed; HA = hydroxyapatite, U = uncoated turned/machined, AE – acid-etched, Before PI = prior to induction of experimental peri implantitis; After PI = following induction of experimental peri-implantitis; NA = Not available; CHX = Chlorhexidine

**Table S4.** Induction and outcome of experimentally induced peri-implant bone loss in studies included in the quantitative synthesis.



| Author           | Published | Induction of peri-implant bone loss                                                           |                   |               |                                               |                                      |                                                                                                                        | Diagnostic markers                               |                                                         |                                                              |                                                   |                                                                                                                              |                                                                                                  |       |                                                                    | Peri-implant bone defect                                                                                                                                  |                                                   |                                                                                                            |                                                           |                                                                                                      |               |  |
|------------------|-----------|-----------------------------------------------------------------------------------------------|-------------------|---------------|-----------------------------------------------|--------------------------------------|------------------------------------------------------------------------------------------------------------------------|--------------------------------------------------|---------------------------------------------------------|--------------------------------------------------------------|---------------------------------------------------|------------------------------------------------------------------------------------------------------------------------------|--------------------------------------------------------------------------------------------------|-------|--------------------------------------------------------------------|-----------------------------------------------------------------------------------------------------------------------------------------------------------|---------------------------------------------------|------------------------------------------------------------------------------------------------------------|-----------------------------------------------------------|------------------------------------------------------------------------------------------------------|---------------|--|
|                  |           | Method (ligature/ overload/other)                                                             | Ligature material | Ligature size | Ligature exchange                             | Duration                             | Control side protocol                                                                                                  | Clinical measurements (BoP/ PPD etc)             | Mobility                                                | Microbiological sampling (cultivation/ PCR)                  | X-ray                                             | Histometric measurements                                                                                                     | Histologic evaluation                                                                            | Other | Registration (days from baseline/ ligature placement)              | Vertical Bone loss Mean ± SD (mm)                                                                                                                         | Horizontal Bone loss Mean ± SD (mm)               | Measuring method                                                                                           | Development after ligature removal (progression/ healing) | Bone loss ± SD (mm) at control side                                                                  | Lost implants |  |
| 1. Lindhe et al  | 1992      | Ligature, submarginal<br>Followed by 1 month plaque accumulation after removal                | Silk              | NA            | Replaced after 3w                             | 6w                                   | Ligatures around 2 teeth                                                                                               | PI, BoP,                                         | All teeth and implantsclinically stable at end of study | In Leonhardt et al, 1992                                     | Periapical radiographs                            | Size and content of ICT reported in Morphometric measurements                                                                | Size and content of ICT reported in Morphometric measurements                                    | -     | 32 with ligature + 30 with spontaneous accumulations               | Implant 3,2±0,3<br>Tooth 1,1±0,6                                                                                                                          | -                                                 | X-rays, periapical with eggen holder. Not specified whehter a mean- or max value was used for each implant | -                                                         | -                                                                                                    | None          |  |
| 2. Lang et al    | 1993      | (A) Ligature implant<br>(B) Spontaneous plaque accumulation implant<br>(C) Natural tooth (M3) | Silk              | NA            | New ligatures on top of old ones at 3m and 6m | 8m                                   | None                                                                                                                   | PI, GI, CAL                                      | -                                                       | -                                                            | Periapical radiographs                            | Supposed to have benn reported in subsequent study that couldn't be retrieved.                                               | Supposed to have benn reported in subsequent study that couldn't be retrieved.                   | -     | 240 (baseline at ligature placement after 30d plaque accumulation) | Radiographic loss (240 days)<br>(A) 1,01 ±0,74<br>(B) 0,36 ±0,31<br>(C) 0,64 ±0,67<br>Data from 30, 60, 150, 180 days also available in table 2 on page 8 | -                                                 | Periapical x-rays, standardized with oral bite block. Mean of mesial and distal values.                    | -                                                         | Registered in vertical bone loss box                                                                 | None reported |  |
| 3. Cook et al    | 1995      | Ligature (tightened between fixture and abutment, suture ends extended to oral cavity)        | Silk              | 4-0           | No                                            | 4w, 8w, 16w and 26w                  | Weekly brushing. No ligature                                                                                           | -                                                | -                                                       | -                                                            | Routine dental radiographs                        | Ground sections - Bone and tissue apposition, porosity of coating on experimental implants, HA thickness on contral implants | Degree of inflammatory response (0-5): Minimal in both CSTi and HA at all time periods examined. | -     | 28+56+112+182                                                      | Histology results at 182d (5 animals):<br>14x CSTi: 1,96±0,94<br>28x HA: 2,69±1,27                                                                        | -                                                 | Histo. Mean + SD                                                                                           | -                                                         | 2 lost: One prior to abutment surgery, the other removed at 2 <sup>nd</sup> surgery due to infection |               |  |
| 4. Persson et al | 1996      | Ligature, submarginal                                                                         | Cotton            | NA            | -                                             | About 6w/ 20% radiographic bone loss | Ligatures on both sides                                                                                                | Bone loss measured with probe during PI-surgery. | -                                                       | -                                                            | IO                                                | Marginal bone loss after GBR.                                                                                                | Cell composition and localisation of ICT                                                         | -     | 42                                                                 | Implant shoulder to bottom of defect: 1,8±0,45<br>(30 days after ligature removal)                                                                        | -                                                 | Periodontal probe, mean value of 4 sides per implant                                                       | -                                                         | -                                                                                                    | -             |  |
| 5. Fritz et al   | 1997      | Ligature                                                                                      | Silk (braided)    | NA            | No                                            | 6m                                   | Ligatures around all implants, contralateral 2 <sup>nd</sup> molar and non-ligated second premolar (anterior abutment) | Plaque score, redness, PPD                       | NA                                                      | -                                                            | Periapical with "quantitative subtraction method" | -                                                                                                                            | -                                                                                                | -     | 90+180                                                             | Root form implants:<br>90d: 1,35±0,24<br>180d: 1,72±0,28<br><br>Plate form:<br>90d: 1,59±0,44<br>180d: 1,89±0,45                                          | -                                                 | "X-ray periapical with standardized technique Quantitative subtraction method"                             | -                                                         | -                                                                                                    | -             |  |
| 6. Hanisch et al | 1997      | Ligature (submarginal)                                                                        | Cotton            | NA            | Yes, every 1m                                 | 10m + 1m additional plaque           | Ligatures around all implants                                                                                          | Modified PI, GI, BOP, PPD, CAL. Calibrated probe | Periotest, Siemens                                      | Submucosal samples from 1 randomly chosen implant in maxilla | -                                                 | -                                                                                                                            | -                                                                                                | -     | 300                                                                | Maxilla: 3,3±1,2<br>Mandible: 3,4±1,4                                                                                                                     | Maxilla: 2,0±0,5<br>Mandible: 2,0±0,4<br>Overall: | Clinical measurement at abutment connection                                                                | -                                                         | -                                                                                                    | 1             |  |



|                     |       |                                                                            |                |    |                                           |     |                                                                                                               |                                                        |   |                                                                                                             |                                                                                                     |                                                                                                                                                                                                                                                                                                                                                        |   |   |    |                                                                                                                                                                                      |    |                                                                                             |   |   |    |
|---------------------|-------|----------------------------------------------------------------------------|----------------|----|-------------------------------------------|-----|---------------------------------------------------------------------------------------------------------------|--------------------------------------------------------|---|-------------------------------------------------------------------------------------------------------------|-----------------------------------------------------------------------------------------------------|--------------------------------------------------------------------------------------------------------------------------------------------------------------------------------------------------------------------------------------------------------------------------------------------------------------------------------------------------------|---|---|----|--------------------------------------------------------------------------------------------------------------------------------------------------------------------------------------|----|---------------------------------------------------------------------------------------------|---|---|----|
| 11. Deppe et al     | 2001  | Ligature                                                                   | Cotton floss   | NA | No                                        | 3m  | Ligatures around all implants                                                                                 | -                                                      | - | -                                                                                                           | Periapical X-rays Long cone technique with custom made film holder                                  | Ground sections – computer assisted histometry: Size of former bone defect and reappositioned bone                                                                                                                                                                                                                                                     | - | - | 90 | Group 1: 1,7±0,8 min 0,00 max 2,90<br>Group 2: 1,7±0,9 min 0,1 max 3,70<br>Group 3: 1,7±0,5 min 0,9 max 3,30<br>(all 3 groups identical in PI but differing in subsequent treatment) | -  | X-ray peripical, customized holder. Mean value of mesial and distal aspect of each implant. | - | - | -  |
| 12. Persson et al.  | 2001a | Ligature                                                                   | Cotton         | NA | (1) 1 mo;<br>(2) 2 mo                     | 3m  | -                                                                                                             | -                                                      | - | -                                                                                                           | IO                                                                                                  | IC-BDc (mm), IC-PM (mm), PM-aJE (mm), aJE-CBI (mm), IC-CBI (mm), IC-BDh (mm)<br>Legends: implant shoulder (IC), bottom of the bone defect (BDc), the marginal level of bone in contact with the implant (CBI), the marginal portion of the periimplant mucosa (PM), the apical termination of the barrier epithelium (aJE), bottom of the defect (BDh) | - | - | 90 | Turned: 3.1±0.5 SLA: 3.2±0.3 (120 days)                                                                                                                                              | -  | X-ray                                                                                       | - | - | -  |
| 13. Shibutani et al | 2000  | Ligature, submarginal technique                                            | Silk           | NA | NA                                        | 12w | Ligaures around all implants. IM bisphosphonate injection (Pamidronate 0,6 mg/ kg IM every 3 days) vs control | -                                                      | - | -                                                                                                           | Pariapical                                                                                          | -                                                                                                                                                                                                                                                                                                                                                      | - | - | 84 | Clinical bone loss (mm) in:<br><br>Pamidronate group 1,59±0,55<br><br>Control group 2,41±0,48                                                                                        | NA | Clinical measurement with periodontal probe on the buccal side at center of the implant     | - | - | -  |
| 14. Shibli et al    | 2003  | Ligature, submarginal and sutured in the peri-implant mucosa for retention | Cotton floss   | NA | Further ligatures on top of old every 20d | 60d | Ligatures around all implants                                                                                 | -                                                      | - | Before ligature placement and at 20d, 40d and 60d after ligature placement. Cultivation of various bacteria | Periapical, long cone technique at ligature placement and 20d, 40d and 60d after ligature placement | -                                                                                                                                                                                                                                                                                                                                                      | - | - | 60 | (1) cpTi 2,09±1,70<br><br>(2) TPS 1,70±1,52<br><br>(3) HA-coated 1,94±1,59<br><br>(4) hybrid turned+acid etched 1,62±1,32                                                            | NA | X-ray, periapical. Average of mesial and distal aspect of each implant                      | - | - | NA |
| 15. Deppe et al     | 2004  | Ligature                                                                   | Cotton (floss) | NA | No                                        | 3m  | Ligatures around all implants                                                                                 | Pressure-froced pocket probing in anesthetized animals | - | -                                                                                                           | Periapical X-rays, long cone technique.                                                             | Ground sections – computer assisted histometry                                                                                                                                                                                                                                                                                                         | - | - | 90 | Conventional X-ray: 2,92±0,51<br>Digital X-ray: 2,97±0,44                                                                                                                            | -  | Conventional X-ray with individuaal template                                                | - | - | -  |

|                         |      |                                                                                                      |                 |    |                                                |                                   |                                     |                           |           |   |                                                   |   |   |   |                                          |                                                                                                                                                                                                                                                                                                                                                                                                      |                    |   |   |                                                                        |
|-------------------------|------|------------------------------------------------------------------------------------------------------|-----------------|----|------------------------------------------------|-----------------------------------|-------------------------------------|---------------------------|-----------|---|---------------------------------------------------|---|---|---|------------------------------------------|------------------------------------------------------------------------------------------------------------------------------------------------------------------------------------------------------------------------------------------------------------------------------------------------------------------------------------------------------------------------------------------------------|--------------------|---|---|------------------------------------------------------------------------|
| 16.<br>Martins<br>et al | 2004 | Ligature<br>(submarginal<br>position)<br>followed by 1<br>year of<br>supragingival<br>plaque control | Cotton<br>floss | NA | Further<br>ligatures at<br>20 day<br>intervals | 60 days or<br>at 40%<br>bone loss | Ligatures<br>around all<br>implants | Pi, GR, BoP,<br>PPD, CAL, | Periotest | - | IO for<br>vertical and<br>horizontal<br>bone loss | - | - | - | Baseline to<br>20d<br>40d<br>60d         | Histology:<br>3,29±0,50<br><br>Baseline<br>TPS: 2,50 ± 0,61<br>HA: 2,01 ± 0,46<br>AE: 2,36 ± 0,54<br>cpTi: 2,40 ± 0,51<br>20 days<br>TPS: 3,85 ± 0,95<br>HA: 3,62 ± 0,29<br>AE: 3,64 ± 0,17<br>cpTi: 4,12 ± 0,72<br>40 days<br>TPS: 4,62 ± 0,90<br>HA: 4,65 ± 0,84<br>AE: 5,19 ± 0,51<br>cpTi: 5,20 ± 0,71<br>60 days<br>TPS: 6,00 ± 0,70<br>HA: 6,22 ± 0,50<br>AE: 6,06 ± 0,27<br>cpTi: 6,32 ± 0,00 | Available in paper | - | - | None reported                                                          |
| 17.<br>Martins<br>et al | 2005 | Ligature<br>(Submarginal<br>position) + 1 year<br>passive phase<br>with daily<br>cleaning            | Cotton<br>floss | NA | Further<br>ligatures at<br>20 day<br>intervals | 60 days                           | Ligatures<br>around all<br>implants | PD, CAL                   | Periotest | - | IO for<br>vertical and<br>horizontal<br>bone loss | - | - | - | Baseline to<br>20d<br>40d<br>60d<br>425d | Baseline<br>cpTi: 2,32 ± 0,53<br>TPS: 2,50 ± 0,61<br>HA: 2,01 ± 0,46<br>Acid: 2,36 ± 0,54<br>20 days<br>cpTi: 4,12 ± 0,72<br>TPS: 3,85 ± 0,95<br>HA: 3,62 ± 0,29<br>Acid: 3,64 ± 0,17<br>40 days<br>cpTi: 5,20 ± 0,71<br>TPS: 4,61 ± 0,90<br>HA: 4,65 ± 0,84<br>Acid: 5,19 ± 0,51<br>60 days<br>cpTi: 6,32 ± 0,33<br>TPS: 6,00 ± 0,70                                                                | Available in paper | - | - | None during<br>ligature phase,<br>17 during the<br>1 year follow<br>up |

|                      |      |                                                                            |              |    |                                           |                                                                                                                                                                                                      |                               |   |   |   |                                                                                                  |                                                                                                                                                      |   |   |     |                                                                                                                                  |                                                                                                                                 |                                                                                                                        |                                                                                                                                |                                                        |
|----------------------|------|----------------------------------------------------------------------------|--------------|----|-------------------------------------------|------------------------------------------------------------------------------------------------------------------------------------------------------------------------------------------------------|-------------------------------|---|---|---|--------------------------------------------------------------------------------------------------|------------------------------------------------------------------------------------------------------------------------------------------------------|---|---|-----|----------------------------------------------------------------------------------------------------------------------------------|---------------------------------------------------------------------------------------------------------------------------------|------------------------------------------------------------------------------------------------------------------------|--------------------------------------------------------------------------------------------------------------------------------|--------------------------------------------------------|
|                      |      |                                                                            |              |    |                                           |                                                                                                                                                                                                      |                               |   |   |   |                                                                                                  |                                                                                                                                                      |   |   |     |                                                                                                                                  | HA: 6,22 ± 0,50<br>Acid: 6,06 ± 0,27                                                                                            | of baseline value from reseptive measurement values will give amount of bone loss                                      |                                                                                                                                |                                                        |
| 18. Berglund h et al | 2006 | Ligature (sub-marginal position) +spontaneous accumulation                 | Cotton       | NA | Every 2 weeks                             | 4m with ligature and 5m with additional plaque accumulation                                                                                                                                          | -                             | - | - | - | Periapical X-rays                                                                                | LM analysis of ground sections. Greater amount of bone loss at the SLA sites than at Polished sites. (7,34 vs 5,95 mm)                               | - | - | 120 | SLA: 2,51± 0,55<br>Polished: 2,27±1,05                                                                                           | X-ray periapical, customized film holder. Mean values for each variable                                                         | Additional loss 5 months after ligature removal: SLA: 1,12±1,07<br>Polished: 0,07±0,72                                 | -                                                                                                                              | None reported                                          |
| 19. Shibli et al     | 2006 | Ligature, submarginal and sutured in the peri-implant mucosa for retention | Cotton floss | NA | Further ligatures on top of old every 20d | 90d                                                                                                                                                                                                  | Ligatures around all implants | - | - | - | -                                                                                                | -                                                                                                                                                    | - | - | 90  | (1) Turned 2,43±0,96<br>(2) TPS 4,55±1,77<br>(3) Hybride 2,60±0,96<br>(4) Sandblasted with Ti-oxide 2,8±0,41                     | Intraoperative measurement with periodontal probe, after reflection of soft tissues. Mean value of 4 sites around each implant. | -                                                                                                                      | 2 implants in 2 animals lost during ligature phase:<br>(1) cpTi (Turned) test group<br>(4) (Sanblasted Ti-oxide) control group |                                                        |
| 20. Albouy et al     | 2008 | Ligature (sub-marginal position) +spontaneous accumulation                 | Cotton       | NA | At weeks 3, 6, and 9                      | 12w (40-50% bone loss)<br>Plaque accumulation continued for 24 weeks after ligature removal<br>10w (12 according to Fig 1 text)<br>Plaque accumulation continued for 26 weeks after ligature removal | -                             |   |   |   | IO before ligature placement. At ligature removal. At 6, 14 and 24 weeks after ligature removal. | -                                                                                                                                                    | - | - | 84  | Baseline at ligature placement. Bone loss at ligature removal:<br>A: 3.53 ± 1,04<br>B: 4.10±0,63<br>C: 4,69±0,52<br>D: 3,58±0,37 | X-ray peripical, customized holder. Mean value of mesial and distal aspect of each implant.                                     | ADDITIONAL bone loss 24 weeks after ligature removal:<br>A: 1,84±1,41<br>B: 1,72±1,25<br>C: 1,55±0,68<br>D: 2,78± 1,91 | -                                                                                                                              | A: 1 implant lost at week 26.<br>D: 1 lost at week 35. |
| 21. Albouy et al     | 2012 | Ligature (sub-marginal position) +spontaneous accumulation                 | Cotton       | NA | Every 3 weeks                             |                                                                                                                                                                                                      | -                             | - | - | - | IO periapical X-rays                                                                             | LM analysis of ground sections. Localisation, vertical extension and area of ICT. Marginal bone position with abutment/fixture junction as reference | - | - | 70  | Marginal bone loss from IO X-rays:<br>At ligature removal (10 weeks):<br>A: 3,00 ± 0,44<br>B: 3,47 ± 0,45                        | X-ray peripical, customized holder. Mean value of mesial and distal aspect of each implant.                                     | Additional bone loss 16 weeks after ligature removal:<br>A: 0,03 ± 0,50<br>B: 1,47 ± 0,65                              | -                                                                                                                              | None reported                                          |

|                              |      |                                                                                                                                                      |        |    |                      |                                                                                                       |                                                  |                                                                                                                              |   |                                                                                                                       |                                                             |                                                                                                                                                               |                                                             |   |         |                                                                                                                                                                                                         |                  |                                                                                                                                                 |                                                                                                                   |   |                                                     |
|------------------------------|------|------------------------------------------------------------------------------------------------------------------------------------------------------|--------|----|----------------------|-------------------------------------------------------------------------------------------------------|--------------------------------------------------|------------------------------------------------------------------------------------------------------------------------------|---|-----------------------------------------------------------------------------------------------------------------------|-------------------------------------------------------------|---------------------------------------------------------------------------------------------------------------------------------------------------------------|-------------------------------------------------------------|---|---------|---------------------------------------------------------------------------------------------------------------------------------------------------------------------------------------------------------|------------------|-------------------------------------------------------------------------------------------------------------------------------------------------|-------------------------------------------------------------------------------------------------------------------|---|-----------------------------------------------------|
| 22.<br>López-<br>Piriz et al | 2012 | Ligatures,<br>submarginal<br>technique                                                                                                               | Cotton | NA | Replaced<br>every 3w | 3m                                                                                                    | Ligatures<br>around all<br>implants              | Assessment of<br>plaque and<br>inflammation<br>weekly                                                                        | - | -                                                                                                                     | Periapical<br>radiographs                                   | -                                                                                                                                                             | -                                                           | - | 90      | (Redcued variable)<br>test<br>Distal test 1,33±1,56<br>Distal ctrl 3,47±3,01<br>Mesial test 2,04±3,72<br>Mesial ctrl 3,73±4,55                                                                          | -                | "X-rays,<br>periapical<br>with holder<br>that allowed<br>easy and<br>predictable<br>alignment.<br>Mean of<br>mesial and<br>distal aspect"       | -                                                                                                                 | - | 1 case implant<br>lost at<br>abutment<br>connection |
| 23.<br>Carcuac<br>et al      | 2013 | Ligature (Sub-<br>marginal<br>position) at<br>implants and 2 <sup>nd</sup> ,<br>3 <sup>rd</sup> and 4 <sup>th</sup><br>premolars in left<br>mandible | Cotton | NA | At weeks 3<br>and 6  | 10w +<br>26w<br>continued<br>plaque<br>accumulat<br>ion                                               | Ligatures<br>around all<br>implants<br>and teeth | -                                                                                                                            | - | -                                                                                                                     | Periapical<br>X-rays with<br>customized<br>film-holder      | LM analysis of<br>groundsections,                                                                                                                             | Immunohistochemical analysis of<br>paraffin sections.       | - | 70      | "Turned: 2,69±0,57<br>Ti-Unite 3,14±0,69                                                                                                                                                                | -                | X-ray<br>peripical,<br>customized<br>holder. Mean<br>value of<br>mesial and<br>distal aspect<br>of each<br>implant.                             | Additional loss 26<br>weeks after ligature<br>removal:<br>Teeth: 0,00±0,53<br>A: -0,02±0,66<br>B: -1,34±1,19      | - | None reported                                       |
| 24. Madi<br>et al            | 2013 | Ligature,<br>submarginal<br>position                                                                                                                 | Silk   | NA | Replaced<br>every 3w | 4m with<br>ligature +<br>5m<br>spontaneo<br>us plaque<br>accumlati<br>on after<br>ligature<br>removal | Ligatures<br>around all<br>implants              | PPD, CAL,<br>modified GI at<br>1,2,3,4,5, and 9 m<br>with periodontal<br>probe at fixed<br>points marked on<br>the abutments | - | -                                                                                                                     | Yes, long<br>cone<br>technique at<br>baseline, 4m<br>and 9m | -                                                                                                                                                             | -                                                           | - | 120+150 | Radiograph mesial:<br>(1) 1±0,6<br>(2) 1,1±0,7<br>(3) 1,1±0,5<br>(4) 1,7±0,6<br>Radiograph distal:<br>(1) 0,9±0,6<br>(2) 0,92±0,6<br>(3) 0,83±0,5<br>(4) 1,6±0,6                                        | -                | X-rays,<br>periapical<br>with custom-<br>made long<br>cone<br>parallelling<br>device.<br>Mesial and<br>distal aspects<br>reported<br>separately | Minor changes in<br>CAL and PPD after<br>5 months<br>spontaneous<br>accumulation<br>following ligature<br>removal | - | none                                                |
| 25.<br>Martinez<br>et al     | 2014 | Ligature<br>(submarginal<br>position)                                                                                                                | Cotton | NA | Replaced<br>every 3w | 3m and<br>13w both<br>mentioned                                                                       | Ligatures<br>around all<br>implants              | -                                                                                                                            | - | -                                                                                                                     | -                                                           | Plastic embedded ground<br>sections Abutment fixture<br>junction, Gingival margin,<br>crestal bone margina, coronal<br>position of bone to implant<br>contact | See paper                                                   | - | 90      | Uncoated controls:<br>Lingual 3,2 ± 0,71<br>Buccal 2,8 ± 0,20<br>Coated mesial implant:<br>Lingual 2,8 ± 0,53<br>Buccal 2,5 ± 0,27<br>Coated distal implant:<br>Lingual 2,7 ± 0,56<br>Buccal 2,6 ± 0,19 | -                | Histo.<br>2 central<br>bucco-<br>lingual<br>sections from<br>each implant                                                                       | -                                                                                                                 | - | One distal<br>coated implant<br>lost                |
| 26.<br>Carcuac<br>et al      | 2015 | Ligature (sub-<br>marginal<br>position)                                                                                                              | Cotton | NA | At weeks 3<br>and 6. | 9w                                                                                                    | Ligatures<br>around all<br>implants              | -                                                                                                                            | - | 4 weeks after<br>ligature removal<br>(hygiene reinstated<br>at ligature<br>removal) DNA-<br>DNA hybridization<br>tech | Periapical<br>X-rays                                        | -                                                                                                                                                             | -                                                           | - | 63      | TiOblast: 3,58±0,76<br>OsseoSpeed: 3,72±0,65<br>At-I: 3,73±0,47<br>TiUnite: 3,57±0,63                                                                                                                   | -                | X-ray<br>peripical,<br>customized<br>holder. Mean<br>value of<br>mesial and<br>distal aspect<br>of each<br>implant.                             | -                                                                                                                 | - | None during<br>the breakdown<br>phase               |
| 27.<br>Huang et<br>al        | 2015 | Ligature, sub-<br>marginal                                                                                                                           | Cotton | NA | No                   | 12w                                                                                                   | Ligatures<br>around all<br>implats               | General<br>description                                                                                                       | - | -                                                                                                                     | Yes but<br>method not<br>specified.                         | Assessment of supra-alveolar<br>bone loss, infrabony defects,<br>marginal bone loss.                                                                          | Undecalcified ground sections in the<br>bucco-lingual plane | - | 84      | "Distance from bone<br>ridge to first bone-to-                                                                                                                                                          | Table 1 in paper | Histo + X-<br>ray: Bucco-<br>lingual                                                                                                            | -                                                                                                                 | - | No losses                                           |

|                              |      |                                                                                   |                    |     |                      |                                                            |                                           |                   |                                                                               |                           | Mesial and<br>distal bone<br>loss<br>assessed<br>radiographic<br>ally |                     |                 |   |       |                                                                                                                                                                                                                                                                                                                                                                                                                                                                                           | implant contact (Ridge-<br>fBIC):<br>Crestal astra implant:<br>0,19±0,25<br>Crestal Bicon implant:<br>0,34±0,30<br>Subcrestal Astra:<br>1,32±0,48<br>Subcrestal Bicon:<br>0,95±0,39" | sections.<br>Average<br>from<br>measurement<br>s on buccal,<br>lingual<br>(histo)<br>mesial and<br>distal (X-ray)<br>aspects.<br>Bone ridge<br>used as ref.<br>point since<br>implants<br>were placed<br>on both<br>crestal and<br>sub-crestal<br>positions. |   |   |   |                                                                      |
|------------------------------|------|-----------------------------------------------------------------------------------|--------------------|-----|----------------------|------------------------------------------------------------|-------------------------------------------|-------------------|-------------------------------------------------------------------------------|---------------------------|-----------------------------------------------------------------------|---------------------|-----------------|---|-------|-------------------------------------------------------------------------------------------------------------------------------------------------------------------------------------------------------------------------------------------------------------------------------------------------------------------------------------------------------------------------------------------------------------------------------------------------------------------------------------------|--------------------------------------------------------------------------------------------------------------------------------------------------------------------------------------|--------------------------------------------------------------------------------------------------------------------------------------------------------------------------------------------------------------------------------------------------------------|---|---|---|----------------------------------------------------------------------|
| 28.<br>Namgong et al.        | 2015 | Ligature                                                                          | Stainless<br>steel | NA  | NP                   | 23w                                                        | -                                         | -                 | -                                                                             | -                         | IO (5, 8, 12,<br>18, 23w),<br>after GBR<br>(4, 8, 12w)                | PPDD, BRH, BRA, BIC | -               | - | 161   | Turned: 2.4 ± 1.0 (XR)<br>2.7±1.2 (H) SA/HA: 2.7<br>± 0.6 (XR) 3.5±1.2 (H)<br>SA: 2.3 ± 1.0 (XR)<br>3.2±1.4 (H) (23 weeks)<br>See fig 8<br>After spontaneous<br>accumulation (84d):<br>Control 0,5±0,44<br>G3 0,45±0,39<br>ZnO35 0,8±0,77<br>G1n-Ag 1,2±0,47<br>Total bone loss after<br>ligature (84d+70d):<br>Control 2,21 ± 0,46<br>G3 1,64±0,43<br>ZnO35 1,42±0,40<br>G1n-Ag 1,45±0,56<br>Bone loss during ligature<br>phase<br>total bone loss -<br>spontaneous<br>accumulation loss | -                                                                                                                                                                                    | IO X-ray and<br>histometric<br>analysis                                                                                                                                                                                                                      | - | - | - | None reported                                                        |
| 29.<br>López-<br>Piriz et al | 2015 | 12w spontaneous<br>accumulation<br>followed by 10w<br>of submarginal<br>ligatures | Cotton             | NA  | Replaced<br>every 3w | 10w<br>(preceded<br>by 12 w<br>spont.<br>Accumula<br>tion) | Same<br>procedure<br>on both<br>sides.    | -                 | -                                                                             | CFU/ml and<br>cultivation | Periapical<br>radiographs                                             | -                   | -               | - | 84+70 | Distance from apical<br>point of implant head to<br>first bone contact, (4 lost<br>ligature implants counted<br>as 1 mm bone loss =<br>total implant leangth):<br><br>Ligature group = n10<br>0,579±0,0490<br><br>Control group = n8                                                                                                                                                                                                                                                      | -                                                                                                                                                                                    | X-rays,<br>periapical<br>with holder<br>that allowed<br>easy and<br>predictable<br>alignment.<br>Mean of<br>mesial and<br>distal aspect                                                                                                                      | - | - | - | 1 G1n-Ag lost<br>at sec surgery                                      |
| 30. Pirih<br>et al           | 2015 | Ligature                                                                          | Silk               | 6-0 | No                   | 12w                                                        | Control<br>animals<br>without<br>ligature | Gingival swelling | Bucco-<br>lingual<br>wiggling<br>forces<br>applied to<br>implants<br>after 4w | -                         | Micro-ct                                                              | Ground sections.    | Ground sections | - | 84    | Distance from apical<br>point of implant head to<br>first bone contact, (4 lost<br>ligature implants counted<br>as 1 mm bone loss =<br>total implant leangth):<br><br>Ligature group = n10<br>0,579±0,0490<br><br>Control group = n8                                                                                                                                                                                                                                                      | NA                                                                                                                                                                                   | Micro CT                                                                                                                                                                                                                                                     | - | - | - | 4 ligature<br>implants lost<br>but included<br>in the<br>statistics. |

|                          |      |                       |                |         |                                                 |     |                               |                                                            |   |   |                                                                       |                                                                                                                                                                                                                                                                                                                                                                                                                                                                                                                                                                                             |                 |   |        |                                                                                                                                                                                                                                                                                                                                                                                                                                                                                                                                                                                                                                                                                                                                        |                                                                              |                                                                                                                                                   |   |             |               |
|--------------------------|------|-----------------------|----------------|---------|-------------------------------------------------|-----|-------------------------------|------------------------------------------------------------|---|---|-----------------------------------------------------------------------|---------------------------------------------------------------------------------------------------------------------------------------------------------------------------------------------------------------------------------------------------------------------------------------------------------------------------------------------------------------------------------------------------------------------------------------------------------------------------------------------------------------------------------------------------------------------------------------------|-----------------|---|--------|----------------------------------------------------------------------------------------------------------------------------------------------------------------------------------------------------------------------------------------------------------------------------------------------------------------------------------------------------------------------------------------------------------------------------------------------------------------------------------------------------------------------------------------------------------------------------------------------------------------------------------------------------------------------------------------------------------------------------------------|------------------------------------------------------------------------------|---------------------------------------------------------------------------------------------------------------------------------------------------|---|-------------|---------------|
| 0,226±0,016              |      |                       |                |         |                                                 |     |                               |                                                            |   |   |                                                                       |                                                                                                                                                                                                                                                                                                                                                                                                                                                                                                                                                                                             |                 |   |        |                                                                                                                                                                                                                                                                                                                                                                                                                                                                                                                                                                                                                                                                                                                                        |                                                                              |                                                                                                                                                   |   |             |               |
| 31. Ishii et al          | 2016 | Ligature              | Dental floss   | NA      | -                                               | 90d | Same as experimental side     | -                                                          | - | - | (1) Standardized dental radiographs (70kv, 15mA, 0,25s). (2) Micro-CT | Ground sections                                                                                                                                                                                                                                                                                                                                                                                                                                                                                                                                                                             | -               | - | 90     | (1) UV-group: 2,0±0,5 mm<br>Controls: 2,7±0,4 mm                                                                                                                                                                                                                                                                                                                                                                                                                                                                                                                                                                                                                                                                                       | (2) Area of bone resorption mm2<br>UV-group: 45,7±9,6<br>Controls: 64,4±10,6 | (1) Dental x-rays Dental X-rays, standardized technique with silicone bite block mean of mesial and distal aspect of each implant<br>(2) Micro-CT | - | (1) 2,7±0,4 | -             |
| 32. Godoy-Gallardo et al | 2016 | Ligature, submarginal | Silk           | 4-0     | NA                                              | 2m  | Ligatures around all implants | PPD, mucosal recession, keratinized ginigiva, CAL, PI, BoP | - | - | Periapical X-rays, micro-ct                                           | Bone and tissue resorption with light microscopy. SEM also used.                                                                                                                                                                                                                                                                                                                                                                                                                                                                                                                            | Ground sections | - | 30, 60 | At ligature placement<br>Ti_Ag: 2,9±0,6<br>Ti_TSP: 2,8±0,5<br>Ti: 3,0±0,6<br><br>30 days<br>Ti_Ag: 3,5±0,4<br>Ti_TSP: 3,6±0,5<br>Ti: 3,9±0,7<br><br>60 days<br>Ti_Ag: 4,1±0,5<br>Ti_TSP: 4,0±0,5<br>Ti: 4,6±0,7<br><b>IS-BD (clinical)</b><br>Immediate model<br>3.88±0.99 (mesial)<br>3.88±0.99 (distal)<br>5.38±1.30 (buccal)<br>3.38±0.52 (lingual)<br>Conventional model<br>3.50±0.53 (mesial)<br>3.13±0.35 (distal)<br>4.00±0.53 (buccal)<br>3.13±0.35 (lingual)<br><b>IS-BD (histological)</b><br>Immediate model<br>6.02±1.20 (buccal)<br>4.41±1.07 (lingual)<br>Conventional model<br>4.34±0.86 (buccal)<br>3.81±0.61 (lingual)<br><b>BC-BD (histological)</b><br>Immediate model<br>0.01±0.00 (buccal)<br>1.06±0.73 (lingual) | X-ray, periapical, standardized mean of mesial and distal aspect             | -                                                                                                                                                 | - | No losses   |               |
| 33. Park et al.          | 2017 | Ligature              | Braided cotton | 1.58 mm | Additional ligature every 4 weeks (no exchange) | 4m  | -                             | IS-BD                                                      | - | - | IO                                                                    | (1) the mineralized tissue area (mm2), including the newly formed bone and bone graft material; (2) coronal bone loss (IS-BD) from the implant shoulder (IS) to the bottom of the defect (BD); (3) defect depth (BC-BD) from the bone crest (BC) to BD; (4) the re-osseointegration height (mm) as the most coronal BIC level from BD; (5) vertical bone fill (%) as the ratio of the re-osseointegration height to IS-BD; (6) total perimeter of BIC (mm) within the re-osseointegrated bone, and (7) the BIC ratio (%) within re-osseointegrated bone as the ratio of (1) the mineralized | -               | - | 120    | -                                                                                                                                                                                                                                                                                                                                                                                                                                                                                                                                                                                                                                                                                                                                      | -                                                                            | Histometric analysis                                                                                                                              | - | -           | None reported |



|                      |      |                                                                                                                              |                 |            |    |                                    |                                   |                                                                                     |   |                        |                                                    |                                                                                                                                                                                                                                                                                                                                                                                                                                                                                                                                                                            |   |   |        |                                                                                                                              |                                                                                                                                                                      |                                                                                              |   |                                                                                                                                                                                                                                 |                                               |  |                                                                 |
|----------------------|------|------------------------------------------------------------------------------------------------------------------------------|-----------------|------------|----|------------------------------------|-----------------------------------|-------------------------------------------------------------------------------------|---|------------------------|----------------------------------------------------|----------------------------------------------------------------------------------------------------------------------------------------------------------------------------------------------------------------------------------------------------------------------------------------------------------------------------------------------------------------------------------------------------------------------------------------------------------------------------------------------------------------------------------------------------------------------------|---|---|--------|------------------------------------------------------------------------------------------------------------------------------|----------------------------------------------------------------------------------------------------------------------------------------------------------------------|----------------------------------------------------------------------------------------------|---|---------------------------------------------------------------------------------------------------------------------------------------------------------------------------------------------------------------------------------|-----------------------------------------------|--|-----------------------------------------------------------------|
|                      |      |                                                                                                                              |                 |            |    |                                    |                                   |                                                                                     |   |                        |                                                    | tissue area (mm2), including the newly formed bone and bone graft material; (2) IS-BD from the IS to the BD; (3) BC-BD from the BC to BD; (4) the re-osseointegration height (mm) as the most coronal BIC level from BD; (5) vertical bone fill (%) as the ratio of the re-osseointegration height to IS-BD; (6) total perimeter of BIC (mm) within the re-osseointegrated bone, and (7) the BIC ratio (%) within re-osseointegrated bone as the ratio of the total perimeter of the bone contact to the whole thread perimeter (mm) between BD and the first BIC position |   |   |        |                                                                                                                              |                                                                                                                                                                      |                                                                                              |   |                                                                                                                                                                                                                                 |                                               |  | Conventional model<br>0.11±0.20 (buccal)<br>1.20±0.58 (lingual) |
| 34. Lin et al        | 2017 | Ligature – Stainless steel ligature wrapped 6 turns around the implant neck and forced as deeply into the pocket as possible | Stainless steel | 0,010 inch | No | 12w                                | Ligatures around all implants     | PPD at 4 aspects per tooth baseline, ligature removal and 4w after ligature removal | - | -                      | Standardize d periapical radiographs at 3w and 12w | -                                                                                                                                                                                                                                                                                                                                                                                                                                                                                                                                                                          | - | - | 21, 84 | 21d (mm)<br>1,6±0,6<br><br>84d<br>4,0±0,8                                                                                    | Width of bone defect mm (linear distance between the 2 peaks of the saucer-shaped defect, minus the diameter of the implant):<br><br>3w: 4,9±1,2<br><br>12w: 6,8±0,8 | X-ray, periapical, film holder connected to tube.<br><br>Average of mesial and distal values | - | -                                                                                                                                                                                                                               | No loose or lost implants at ligature removal |  |                                                                 |
| 35. Koutouzi s et al | 2017 | Bacterial inoculation with P. gingivalis, Treponema Denticola, Tannerella forsythia by means of gingival lavage              | -               | -          | -  | 24 inoculations during a 6w period | 6/12 animals were sham inoculated | -                                                                                   | - | Yes, 16S ribosomal RNA | Micro-ct                                           | -                                                                                                                                                                                                                                                                                                                                                                                                                                                                                                                                                                          | - | - | 42     | Infected (n= 4 implants): 0,80±0,72<br>+2 infected rats had both implants failed<br>Sham-infected (n= 3 implants): 0,48±0,13 |                                                                                                                                                                      | Micro-CT. Distance between implant platform to first BIC.                                    |   | Majority of implants in both groups were excluded before study end, for reasons outside the treatment, such as aspiration: Three rats with 4 implants in the infection group and two rats with 3 implants in the sham-infection |                                               |  |                                                                 |

NA = not available; X = not investigated; Pi = plaque index; GR = gingival redness; BoP = Bleeding in probing; PPD = pocket probing depth; CAL = clinical attachment level; TPS = titanium plasma sprayed; HA = hydroxyapatite, U = ~~uncoated~~ turned/machined; IO – intraoral; ICT = Infiltrated connective tissue; MBL – marginal bone level  
LM: Light microscope, GI = Gingival index
